# Supplementary material for: Quantitative Proteomics Reveal That CB2R Agonist JWH-133 Downregulates NF-κB Activation, Oxidative Stress, and Lysosomal Exocytosis from HIV-Infected Macrophages
Source: MDPI journal article supplement (doi:10.3390/ijms25063246), 2024-03-13
Supplement: s1 [file s1]

**Table S3. TMT Tags Description.** A TMT10-plex kit was used to run each of the 9 samples + 1 pool of uninfected/vehicle controls from all donors.

| TMT Label | Sample ID                                  | Category                        |
|-----------|--------------------------------------------|---------------------------------|
| 126       | <i>Internal Control – Pool of controls</i> | <i>Pool: Uninfected/Vehicle</i> |
| 127N      | D1                                         | (Control)Uninfected/Vehicle     |
| 127C      | D2                                         | (Control)Uninfected/Vehicle     |
| 128N      | D3                                         | (Control)Uninfected/Vehicle     |
| 128C      | D1                                         | HIV+/Vehicle                    |
| 129N      | D2                                         | HIV+/Vehicle                    |
| 129C      | D3                                         | HIV+/Vehicle                    |
| 130N      | D1                                         | HIV+/Agonist                    |
| 130C      | D2                                         | HIV+/Agonist                    |
| 131       | D3                                         | HIV+/Agonist                    |
