# Supplementary material for: Quantitative Proteomics Reveal That CB2R Agonist JWH-133 Downregulates NF-κB Activation, Oxidative Stress, and Lysosomal Exocytosis from HIV-Infected Macrophages
Source: MDPI journal article supplement (doi:10.3390/ijms25063246), 2024-03-13
Supplement: s1 [file s1]

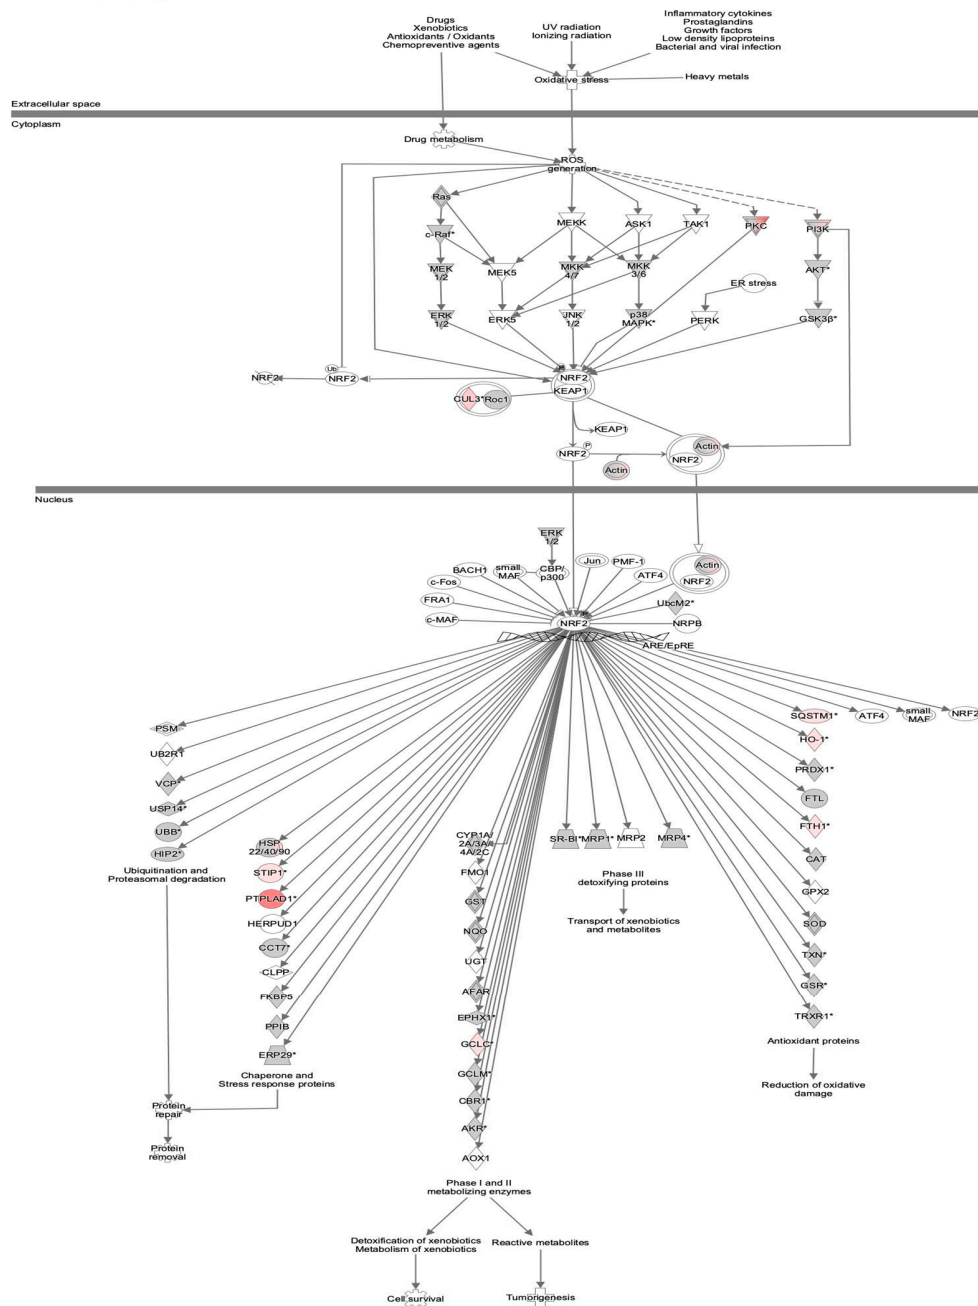

**Figure S1. Canonical Pathway of Nrf2-mediated Oxidative Stress Response of the HIV infected group compared to uninfected controls.** Red symbols represent upregulated proteins. Gray symbols represent unregulated proteins in the dataset. White symbols represent proteins absent in the dataset. Higher color intensity = higher absolute value of fold change expression. This figure was obtained from IPA.

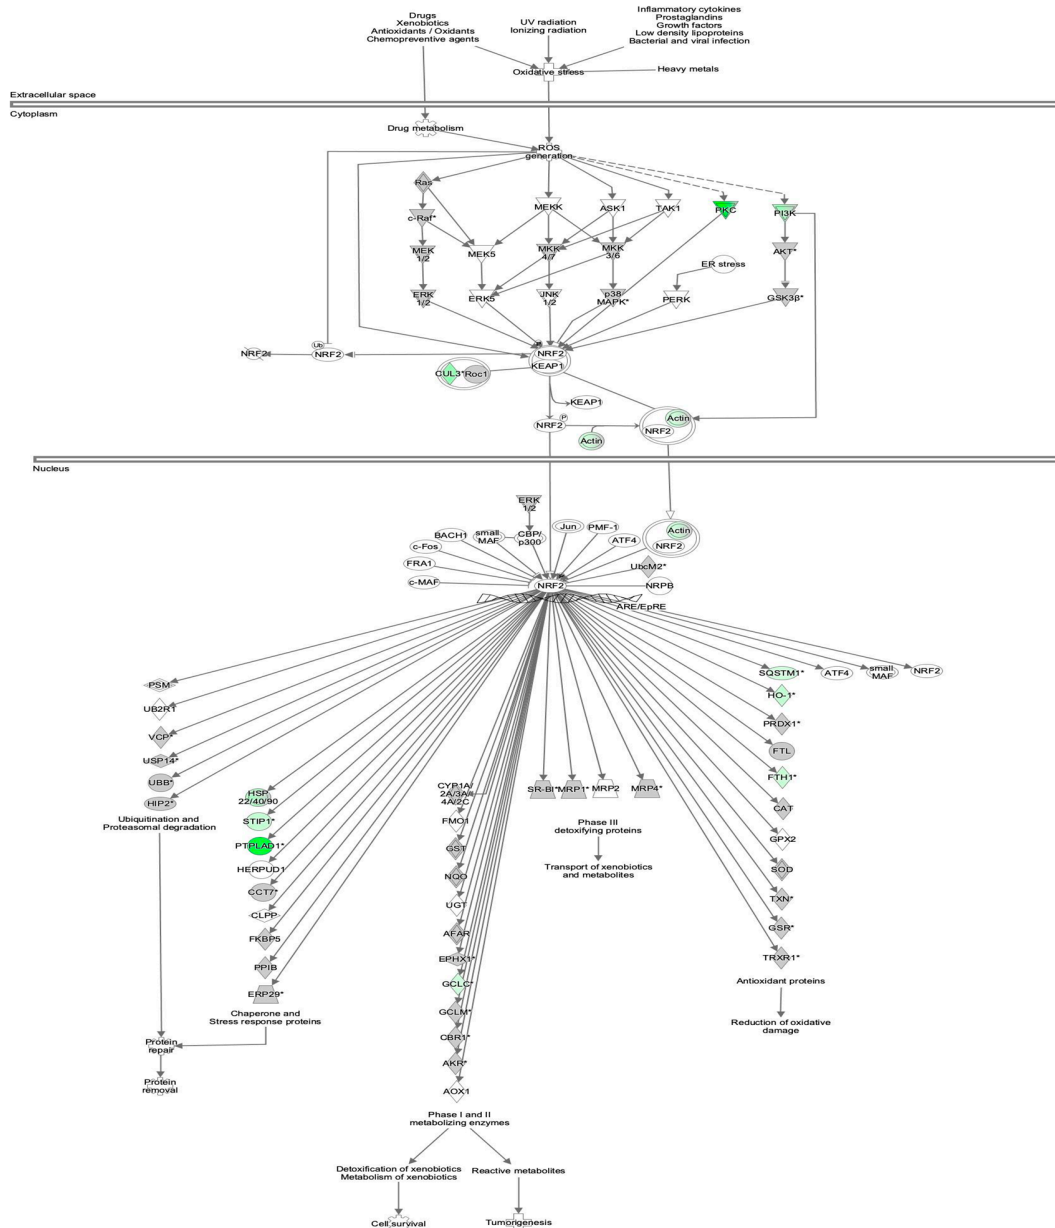

**Figure S2. Canonical pathway of Nrf2-mediated oxidative stress response for the HIV + agonist group compared to untreated HIV.** Green symbols represent downregulated proteins. Gray symbols represent unregulated proteins in the dataset. White symbols represent proteins absent in the dataset. Higher color intensity = higher absolute value of fold change expression. This figure was obtained from IPA.

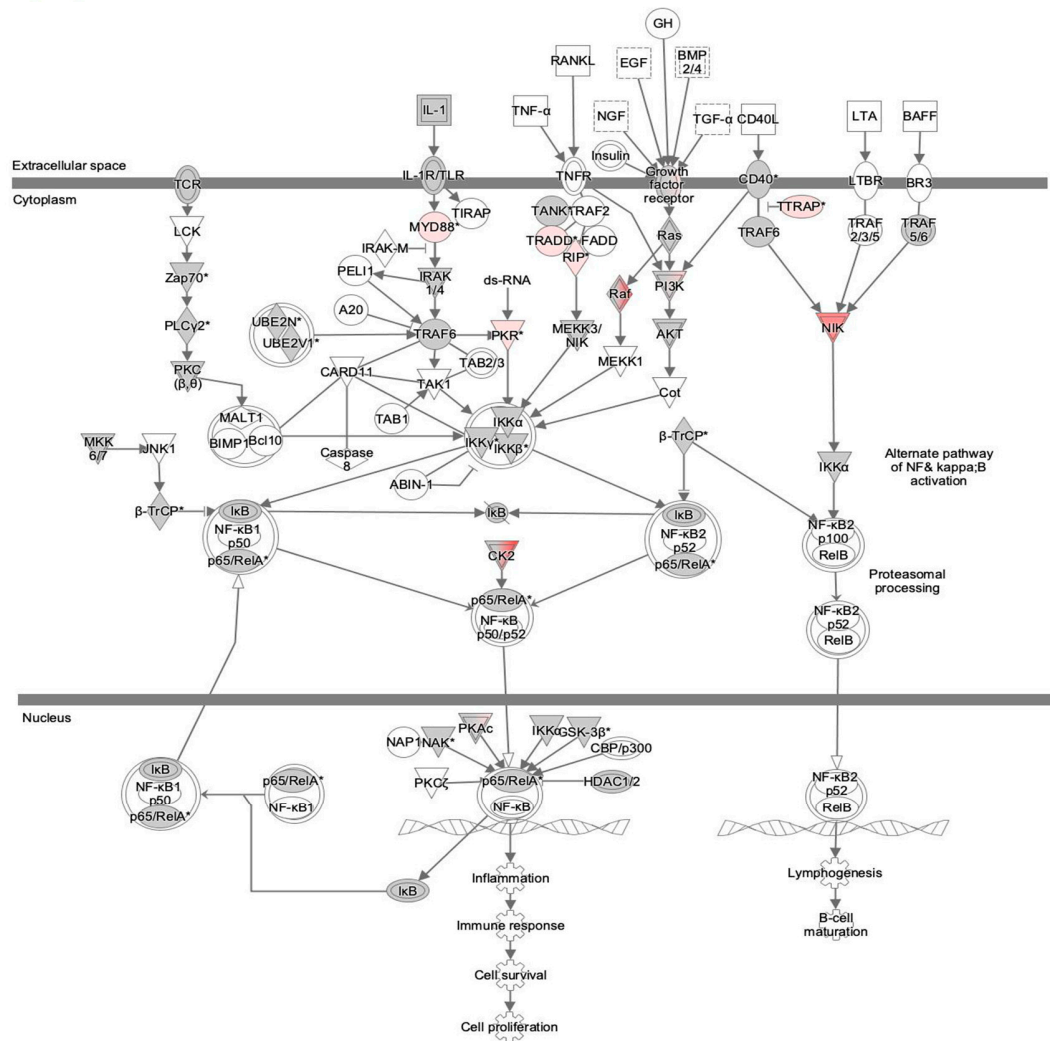

**Figure S3. Canonical pathway of NF- $\kappa$ B signaling for the HIV infected group compared to uninfected controls.** Red symbols represent upregulated proteins. Gray symbols represent unregulated proteins in the dataset. White symbols represent proteins absent in the dataset. Higher color intensity = higher absolute value of fold change expression. This figure was obtained from IPA.

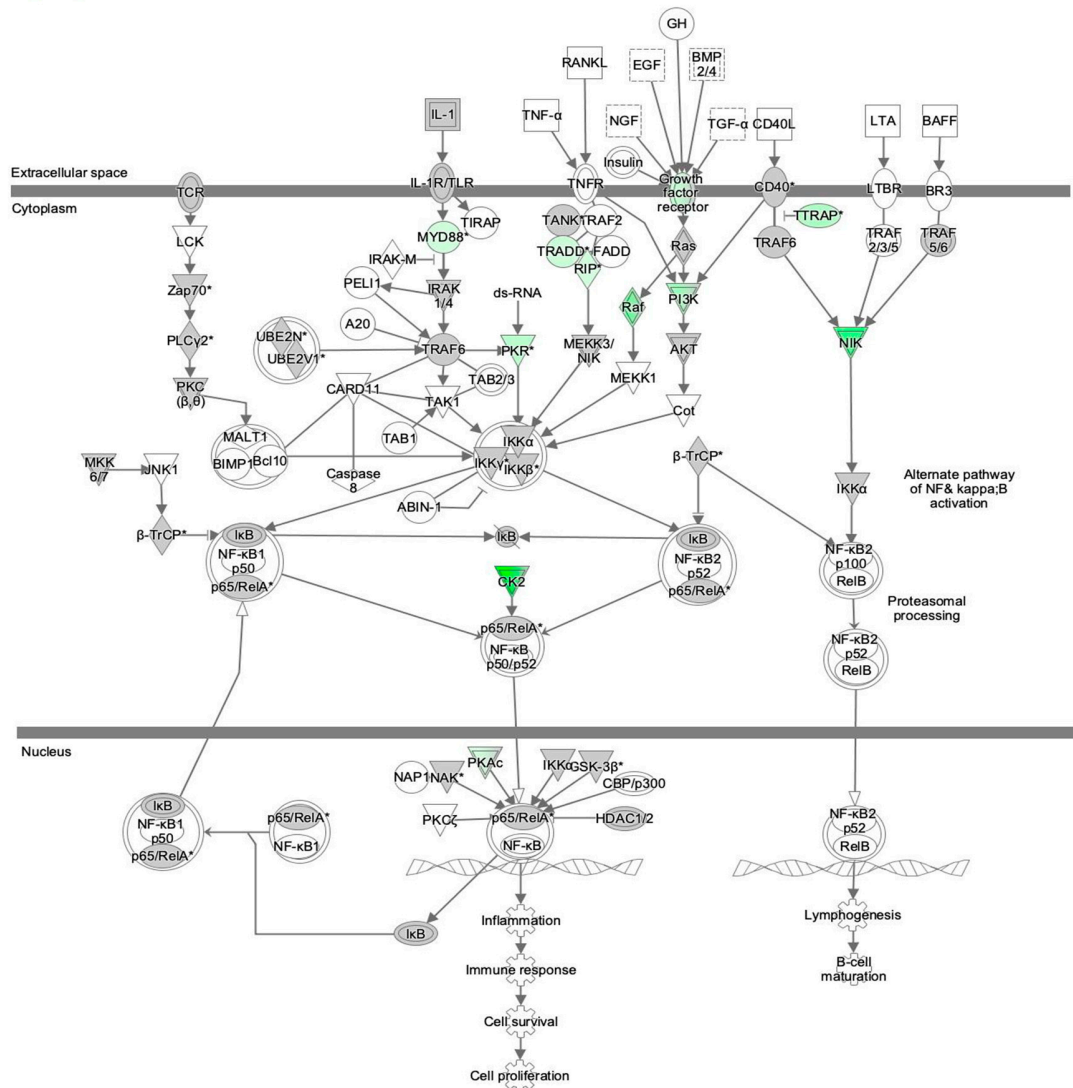

**Figure S4. Canonical pathway of NF- $\kappa$ B signaling for the HIV + agonist group compared to untreated HIV infected group.** Green symbols represent downregulated proteins. Gray symbols represent unregulated proteins in the dataset. White symbols represent proteins absent in the dataset. Higher color intensity = higher absolute value of fold change expression. This figure was obtained from IPA.

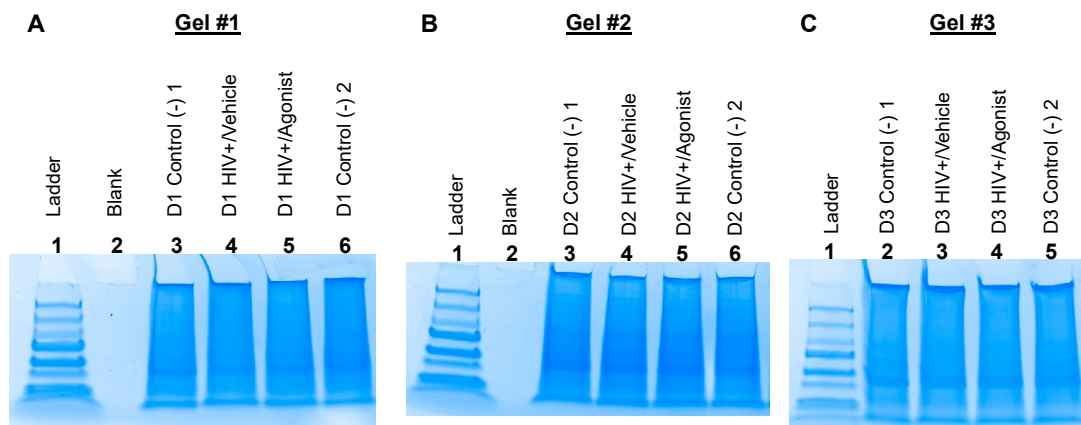

**Figure S5. SDS gels.** 20 µg of each sample was run in SDS gels and stained with Bio-safe Coomassie G-250 Stain. Each donor was run in a separate gel. Two controls (Uninfected/Vehicle) per donor were run in each gel. **A.** Samples of Donor 1. **B.** Samples of donor 2. **C.** Samples of donor 3.
