# Supplementary material for: Quantitative Proteomics Reveal That CB2R Agonist JWH-133 Downregulates NF-κB Activation, Oxidative Stress, and Lysosomal Exocytosis from HIV-Infected Macrophages
Source: Int J Mol Sci. 2024 Mar 13;25(6):3246. doi: 10.3390/ijms25063246 (PMC10970132; doi:10.3390/ijms25063246)
Supplement: Supplementary file 1 [file ijms-25-03246-s001.zip]

Archive with 4 entries (4 files):
- Supplementary Figures S1-S5.pdf
- Table S1-Protein Species HIV vs Uninfected.xlsx
- Table S2-Protein Species HIV-Agonist vs. HIV.xlsx
- Table S3-TMT Tags Description.pdf
