# Supplementary material for: Quantitative Proteomics Reveal That CB2R Agonist JWH-133 Downregulates NF-κB Activation, Oxidative Stress, and Lysosomal Exocytosis from HIV-Infected Macrophages
Source: Int J Mol Sci. 2024 Mar 13;25(6):3246. doi: 10.3390/ijms25063246 (PMC10970132; doi:10.3390/ijms25063246)
Supplement: Supplementary file 1 [file ijms-25-03246-s001.zip › Table S1-Protein Species HIV vs Uninfected.xlsx]

## Sheet: HIV vs Uninfected
Accession	FC	P.Value	adj.P.Val-FDR
A0A3B3ISV4	237.122	6.98486e-09	5.65604e-06
Q8N0U8	237.122	6.98486e-09	5.65604e-06
Q8N0U8-2	237.122	6.98486e-09	5.65604e-06
H3BSE5	228.118	1.57405e-08	6.10335e-06
A0A2R8YCC9	187.779	1.01136e-08	5.84699e-06
Q92851-2	120.481	5.16383e-08	8.19299e-06
Q92851-4	120.481	5.16383e-08	8.19299e-06
Q92851-6	120.481	5.16383e-08	8.19299e-06
A6NIZ0	120.179	1.14881e-07	1.11292e-05
Q5T196	110.673	4.75103e-09	5.65604e-06
Q8NFF5	110.673	4.75103e-09	5.65604e-06
Q8NFF5-2	110.673	4.75103e-09	5.65604e-06
Q8NFF5-3	110.673	4.75103e-09	5.65604e-06
Q8NFF5-4	110.673	4.75103e-09	5.65604e-06
Q8NFF5-5	110.673	4.75103e-09	5.65604e-06
O95486	92.8755	1.7119e-08	6.10335e-06
P10398-2	85.4248	2.27307e-08	6.44347e-06
O96011-2	82.0857	2.46741e-09	5.65604e-06
C9JKC2	79.0665	4.0318e-09	5.65604e-06
P23409	74.6511	5.4705e-07	2.46077e-05
H0Y565	66.229	1.07436e-08	6.01711e-06
H0YL22	61.988	3.90774e-08	7.69609e-06
H0YNB7	61.988	3.90774e-08	7.69609e-06
H0YNN4	61.988	3.90774e-08	7.69609e-06
Q9Y375	61.988	3.90774e-08	7.69609e-06
B4DH23	60.7182	8.9285e-09	5.65604e-06
H3BQH9	60.7182	8.9285e-09	5.65604e-06
H3BRI3	60.7182	8.9285e-09	5.65604e-06
O75864	57.0668	7.75985e-09	5.65604e-06
O96011	56.9722	8.70596e-09	5.65604e-06
Q9NPH2	54.6159	2.06813e-07	1.55736e-05
Q9NPH2-2	54.6159	2.06813e-07	1.55736e-05
Q9NPH2-3	54.6159	2.06813e-07	1.55736e-05
Q8IYB7-2	54.3609	6.99722e-09	5.65604e-06
Q8IYB7-3	54.3609	6.99722e-09	5.65604e-06
A0A2R8Y3W6	50.5312	5.95233e-09	5.65604e-06
A0A2R8Y797	50.5312	5.95233e-09	5.65604e-06
A0A2R8Y7T1	50.5312	5.95233e-09	5.65604e-06
A0A2R8YCK2	50.5312	5.95233e-09	5.65604e-06
A0A2R8YEL7	50.5312	5.95233e-09	5.65604e-06
A0A2R8YF47	50.5312	5.95233e-09	5.65604e-06
V9GY80	50.5312	5.95233e-09	5.65604e-06
H7C059	48.2787	2.79473e-08	6.86126e-06
A0A3B3IRL2	46.0557	6.27172e-09	5.65604e-06
O75629	46.0557	6.27172e-09	5.65604e-06
A0A0C4DH86	45.8102	1.04142e-07	1.01436e-05
C9JME6	41.3583	9.46777e-09	5.65604e-06
Q9UPT5-4	41.3583	9.46777e-09	5.65604e-06
G3V4Q2	41.0083	1.39184e-08	6.10335e-06
G3V5X8	41.0083	1.39184e-08	6.10335e-06
U3KQP4	39.8627	8.85051e-09	5.65604e-06
H7C3V5	39.7792	1.00021e-07	9.91011e-06
G3V4E7	36.1262	2.74106e-08	6.82295e-06
K4DI97	36.0622	1.78908e-08	6.10335e-06
E9PKK0	33.5772	4.30857e-07	2.1937e-05
J3KTH7	32.2696	2.3518e-08	6.48445e-06
J3KRN5	32.1421	4.63111e-08	8.19299e-06
Q96GQ5-2	31.9891	3.52326e-06	6.55019e-05
A0A2R8YDY7	31.5403	1.33583e-08	6.10335e-06
H3BPL6	31.3638	8.04265e-08	8.89426e-06
P0DMM9-2	31.3638	8.04265e-08	8.89426e-06
P0DMM9-3	31.3638	8.04265e-08	8.89426e-06
P0DMN0	31.3638	8.04265e-08	8.89426e-06
G3V3Z4	30.9949	1.25855e-06	3.686e-05
G3V4P5	30.9949	1.25855e-06	3.686e-05
C9IYD3	30.66	8.89391e-07	2.97382e-05
C9JPY2	30.66	8.89391e-07	2.97382e-05
C9JQC9	30.66	8.89391e-07	2.97382e-05
A0A0G2JQ62	30.6013	6.17734e-07	2.52342e-05
A0A0G2JRI7	30.6013	6.17734e-07	2.52342e-05
A0A0A0MRE1	29.1386	1.83897e-08	6.10335e-06
A0A0A0MSB8	29.1386	1.83897e-08	6.10335e-06
B4DJ07	29.1386	1.83897e-08	6.10335e-06
Q9UPT5	29.1386	1.83897e-08	6.10335e-06
Q9UPT5-1	29.1386	1.83897e-08	6.10335e-06
Q9UPT5-2	29.1386	1.83897e-08	6.10335e-06
Q9UPT5-5	29.1386	1.83897e-08	6.10335e-06
Q9UPT5-6	29.1386	1.83897e-08	6.10335e-06
A0A0C4DFS8	28.6146	1.33915e-07	1.15386e-05
Q9NS86	28.1854	8.63643e-08	9.15871e-06
H7C440	28.0897	1.40575e-08	6.10335e-06
Q8IYB7	28.0897	1.40575e-08	6.10335e-06
B4DJ23	28.0652	2.17042e-07	1.59419e-05
B3KNW1	27.7911	2.91435e-08	7.05825e-06
Q13568	27.6569	1.51964e-08	6.10335e-06
Q13568-2	27.6569	1.51964e-08	6.10335e-06
Q13568-3	27.6569	1.51964e-08	6.10335e-06
Q13568-4	27.6569	1.51964e-08	6.10335e-06
Q13568-5	27.6569	1.51964e-08	6.10335e-06
A0A0B4J287	27.2544	4.55902e-08	8.19299e-06
H3BPG2	27.2544	4.55902e-08	8.19299e-06
H7BZC5	27.2014	1.68258e-08	6.10335e-06
A0A0C4DG34	26.6245	3.63584e-08	7.69609e-06
O95081	26.6245	3.63584e-08	7.69609e-06
O95081-2	26.6245	3.63584e-08	7.69609e-06
Q8TDZ2-2	26.203	6.06633e-08	8.62863e-06
H3BPZ1	25.1265	1.51458e-07	1.23087e-05
H3BS72	25.1265	1.51458e-07	1.23087e-05
Q86V21	24.8004	3.41856e-08	7.69609e-06
Q86V21-3	24.8004	3.41856e-08	7.69609e-06
F8WBW1	24.0786	3.69928e-08	7.69609e-06
F8WC41	24.0786	3.69928e-08	7.69609e-06
A0A590UJB9	23.9396	2.30098e-08	6.44347e-06
A0A590UK79	23.9396	2.30098e-08	6.44347e-06
C9JVE2	23.8213	2.29717e-08	6.44347e-06
Q96GG9	23.8213	2.29717e-08	6.44347e-06
C9IZS4	23.7991	2.11161e-08	6.44347e-06
C9JQ02	23.7991	2.11161e-08	6.44347e-06
C9JV99	23.7991	2.11161e-08	6.44347e-06
Q9UKW4	23.3226	4.42092e-07	2.22561e-05
Q9UKW4-2	23.3226	4.42092e-07	2.22561e-05
Q9UKW4-3	23.3226	4.42092e-07	2.22561e-05
Q9UKW4-4	23.3226	4.42092e-07	2.22561e-05
K7EN81	23.2447	2.6429e-08	6.76657e-06
A0A3B3IS23	23.078	5.52806e-08	8.19299e-06
A0A3B3ITX2	23.078	5.52806e-08	8.19299e-06
A0A3B3IRZ4	22.9385	2.12775e-07	1.57576e-05
F6V107	22.9385	2.12775e-07	1.57576e-05
H7C3Z6	22.9385	2.12775e-07	1.57576e-05
Q9NRD5-2	22.9385	2.12775e-07	1.57576e-05
H7C4W6	22.6499	2.14262e-08	6.44347e-06
Q9Y2G3	22.6499	2.14262e-08	6.44347e-06
Q9UDW1	22.4141	6.39884e-06	9.929e-05
A0A2R8Y4D6	22.3643	2.57075e-08	6.67725e-06
A0A2R8Y4H0	22.3643	2.57075e-08	6.67725e-06
A0A2R8YEW1	22.3643	2.57075e-08	6.67725e-06
V9GYA2	22.3643	2.57075e-08	6.67725e-06
F8VRV5	21.9047	1.27959e-07	1.14199e-05
F8VXL2	21.9047	1.27959e-07	1.14199e-05
Q96QW7	21.4825	3.81108e-08	7.69609e-06
A0A494C159	21.3328	2.73694e-08	6.82295e-06
J3QRN6	20.7549	7.04955e-07	2.61578e-05
C9J4I3	20.7513	5.03372e-07	2.37727e-05
P51692	20.7513	5.03372e-07	2.37727e-05
B4E0E3	20.6331	9.93192e-06	0.000139498
G3V1M5	20.6331	9.93192e-06	0.000139498
Q9H6X4	20.6331	9.93192e-06	0.000139498
Q9H6X4-2	20.6331	9.93192e-06	0.000139498
Q9H6X4-3	20.6331	9.93192e-06	0.000139498
Q9P035	20.3406	8.05062e-08	8.89426e-06
Q9NTJ4	20.2847	3.75791e-08	7.69609e-06
Q9NTJ4-2	20.2847	3.75791e-08	7.69609e-06
Q9NTJ4-3	20.2847	3.75791e-08	7.69609e-06
Q9NTJ4-4	20.2847	3.75791e-08	7.69609e-06
A0A0A0MRX3	20.2637	5.23456e-08	8.19299e-06
H0YLE5	20.2602	9.52935e-08	9.83694e-06
Q8TDZ2	20.0276	9.60532e-08	9.83694e-06
Q8TDZ2-4	20.0276	9.60532e-08	9.83694e-06
O43252	19.5246	5.45269e-08	8.19299e-06
H0Y2V6	19.4559	7.73657e-08	8.89426e-06
H0YB92	19.4559	7.73657e-08	8.89426e-06
Q5SW79	19.4559	7.73657e-08	8.89426e-06
Q5SW79-2	19.4559	7.73657e-08	8.89426e-06
Q5SW79-3	19.4559	7.73657e-08	8.89426e-06
J3KRS1	19.4226	1.30522e-06	3.71305e-05
Q8NGD4	19.0698	4.62343e-05	0.000533555
Q9BV20	18.4472	4.1227e-08	7.94484e-06
Q9BV20-2	18.4472	4.1227e-08	7.94484e-06
K7EQ37	18.3103	5.09888e-08	8.19299e-06
Q70J99-2	18.3103	5.09888e-08	8.19299e-06
B4DP72	18.2724	6.31023e-08	8.69492e-06
K7EL17	18.2479	8.3867e-08	8.94681e-06
Q68DZ5	18.2479	8.3867e-08	8.94681e-06
P43490	18.088	2.1688e-07	1.59419e-05
B4DT28	18.0345	1.2481e-07	1.14199e-05
O43390	18.0345	1.2481e-07	1.14199e-05
O43390-2	18.0345	1.2481e-07	1.14199e-05
O43390-3	18.0345	1.2481e-07	1.14199e-05
O43390-4	18.0345	1.2481e-07	1.14199e-05
C9JXZ5	17.7101	3.75365e-07	1.99913e-05
Q9NVQ4	17.6218	8.18855e-08	8.89426e-06
Q9NVQ4-2	17.6218	8.18855e-08	8.89426e-06
Q9NVQ4-3	17.6218	8.18855e-08	8.89426e-06
Q5T2E7	17.6046	3.96025e-07	2.03369e-05
K7EIG7	17.459	9.7503e-07	3.12044e-05
O94832	17.459	9.7503e-07	3.12044e-05
C9J673	17.4172	3.75518e-08	7.69609e-06
A6NIC1	17.247	3.62215e-07	1.99913e-05
C9JCM7	17.1624	1.07122e-06	3.36814e-05
H0Y5G7	17.1624	1.07122e-06	3.36814e-05
P10398	17.1008	5.64479e-08	8.19299e-06
Q96II5	17.1008	5.64479e-08	8.19299e-06
A0A087WTL9	17.0133	5.66862e-08	8.19299e-06
F8VY40	17.0133	5.66862e-08	8.19299e-06
F8W1I4	17.0133	5.66862e-08	8.19299e-06
Q71RC2	17.0133	5.66862e-08	8.19299e-06
Q71RC2-3	17.0133	5.66862e-08	8.19299e-06
Q71RC2-4	17.0133	5.66862e-08	8.19299e-06
Q71RC2-5	17.0133	5.66862e-08	8.19299e-06
Q71RC2-6	17.0133	5.66862e-08	8.19299e-06
Q71RC2-7	17.0133	5.66862e-08	8.19299e-06
Q8TBL5	17.0133	5.66862e-08	8.19299e-06
Q96J85	17.0133	5.66862e-08	8.19299e-06
K7EQ08	16.985	3.85294e-07	2.00497e-05
Q9NQL2	16.9425	3.29443e-07	1.95506e-05
Q9NQL2-2	16.9425	3.29443e-07	1.95506e-05
M0QZ24	16.7401	6.02987e-08	8.62863e-06
Q8NCE2	16.707	6.24659e-08	8.6784e-06
Q8NCE2-2	16.707	6.24659e-08	8.6784e-06
Q8NCE2-3	16.707	6.24659e-08	8.6784e-06
Q9Y608	16.7066	3.81489e-07	1.99913e-05
Q9Y608-2	16.7066	3.81489e-07	1.99913e-05
Q9Y608-3	16.7066	3.81489e-07	1.99913e-05
Q9Y608-4	16.7066	3.81489e-07	1.99913e-05
Q9Y608-5	16.7066	3.81489e-07	1.99913e-05
Q96II8	16.6326	2.92632e-07	1.81843e-05
Q96II8-2	16.6326	2.92632e-07	1.81843e-05
Q96II8-3	16.6326	2.92632e-07	1.81843e-05
Q96II8-4	16.6326	2.92632e-07	1.81843e-05
J3KSP2	16.5573	2.54084e-06	5.27659e-05
H7C3K7	16.3604	6.78508e-08	8.89426e-06
A0A1W2PNU5	16.3584	2.21851e-06	4.77886e-05
A0A3B3IRR1	16.3584	2.21851e-06	4.77886e-05
A0A3B3IU34	16.3584	2.21851e-06	4.77886e-05
A0A3B3IU56	16.3584	2.21851e-06	4.77886e-05
A0A3F2YNY7	16.3584	2.21851e-06	4.77886e-05
F5GY90	16.3584	2.21851e-06	4.77886e-05
F5H0P4	16.3584	2.21851e-06	4.77886e-05
F5H226	16.3584	2.21851e-06	4.77886e-05
F5H345	16.3584	2.21851e-06	4.77886e-05
P08397	16.3584	2.21851e-06	4.77886e-05
P08397-2	16.3584	2.21851e-06	4.77886e-05
P08397-3	16.3584	2.21851e-06	4.77886e-05
P08397-4	16.3584	2.21851e-06	4.77886e-05
A0A2R8Y7C0	16.3239	1.52468e-07	1.23087e-05
P69905	16.3239	1.52468e-07	1.23087e-05
B8ZZY2	16.3028	5.22711e-08	8.19299e-06
C9J2I0	16.3028	5.22711e-08	8.19299e-06
P52594	16.3028	5.22711e-08	8.19299e-06
P52594-2	16.3028	5.22711e-08	8.19299e-06
P52594-3	16.3028	5.22711e-08	8.19299e-06
P52594-4	16.3028	5.22711e-08	8.19299e-06
Q99797	16.1458	1.60573e-06	4.06467e-05
Q8TAF3	15.9644	8.09299e-08	8.89426e-06
Q8TAF3-2	15.9644	8.09299e-08	8.89426e-06
Q8TAF3-3	15.9644	8.09299e-08	8.89426e-06
Q8TAF3-4	15.9644	8.09299e-08	8.89426e-06
Q8TAF3-5	15.9644	8.09299e-08	8.89426e-06
Q8IWT6	15.5685	4.49958e-07	2.25886e-05
H0YMR4	15.5318	7.42818e-08	8.89426e-06
H0YN07	15.5318	7.42818e-08	8.89426e-06
Q8TEX9	15.5318	7.42818e-08	8.89426e-06
Q8TEX9-2	15.5318	7.42818e-08	8.89426e-06
A0A2R8YDP2	15.1402	7.29187e-08	8.89426e-06
A0A2R8YFU2	15.1402	7.29187e-08	8.89426e-06
Q9NSY1	15.1358	1.00906e-07	9.91011e-06
Q9NSY1-2	15.1358	1.00906e-07	9.91011e-06
Q9NSY1-3	15.1358	1.00906e-07	9.91011e-06
Q01518	14.9279	7.41613e-08	8.89426e-06
Q5T0R1	14.9279	7.41613e-08	8.89426e-06
Q5T0R2	14.9279	7.41613e-08	8.89426e-06
Q5T0R3	14.9279	7.41613e-08	8.89426e-06
Q5T0R4	14.9279	7.41613e-08	8.89426e-06
Q5T0R5	14.9279	7.41613e-08	8.89426e-06
Q5T0R6	14.9279	7.41613e-08	8.89426e-06
Q5T0R7	14.9279	7.41613e-08	8.89426e-06
H7C1G6	14.5777	5.8035e-06	9.34316e-05
Q9BYJ9	14.2403	6.35551e-08	8.69492e-06
F2Z3J2	14.0375	8.90092e-08	9.38366e-06
O43719	13.9115	1.30626e-07	1.14199e-05
Q5H918	13.9115	1.30626e-07	1.14199e-05
Q5H919	13.9115	1.30626e-07	1.14199e-05
P36406	13.9099	9.96362e-08	9.91011e-06
P36406-2	13.9099	9.96362e-08	9.91011e-06
P36406-3	13.9099	9.96362e-08	9.91011e-06
A0A1B0GXL9	13.8059	6.39853e-07	2.52342e-05
B0QYS6	13.8059	6.39853e-07	2.52342e-05
B0QYS7	13.8059	6.39853e-07	2.52342e-05
B1AKB4	13.8059	6.39853e-07	2.52342e-05
B1AKB5	13.8059	6.39853e-07	2.52342e-05
B7Z757	13.8059	6.39853e-07	2.52342e-05
C9JBI8	13.8059	6.39853e-07	2.52342e-05
O14948	13.8059	6.39853e-07	2.52342e-05
O14948-2	13.8059	6.39853e-07	2.52342e-05
O14948-3	13.8059	6.39853e-07	2.52342e-05
O14948-4	13.8059	6.39853e-07	2.52342e-05
O75030	13.8059	6.39853e-07	2.52342e-05
O75030-10	13.8059	6.39853e-07	2.52342e-05
O75030-11	13.8059	6.39853e-07	2.52342e-05
O75030-12	13.8059	6.39853e-07	2.52342e-05
O75030-2	13.8059	6.39853e-07	2.52342e-05
O75030-3	13.8059	6.39853e-07	2.52342e-05
O75030-4	13.8059	6.39853e-07	2.52342e-05
O75030-5	13.8059	6.39853e-07	2.52342e-05
O75030-6	13.8059	6.39853e-07	2.52342e-05
O75030-7	13.8059	6.39853e-07	2.52342e-05
O75030-8	13.8059	6.39853e-07	2.52342e-05
O75030-9	13.8059	6.39853e-07	2.52342e-05
P19484	13.8059	6.39853e-07	2.52342e-05
P19484-2	13.8059	6.39853e-07	2.52342e-05
P19532	13.8059	6.39853e-07	2.52342e-05
K7EJT5	13.6625	7.07837e-08	8.89426e-06
A0A3B3ITP4	13.6326	3.78357e-07	1.99913e-05
Q495G5	13.6326	3.78357e-07	1.99913e-05
Q8IVH4	13.6326	3.78357e-07	1.99913e-05
Q08554	13.5999	2.70327e-07	1.78095e-05
Q08554-2	13.5999	2.70327e-07	1.78095e-05
H0YFZ4	13.3748	3.49233e-07	1.99913e-05
Q16678	13.3576	2.55012e-06	5.27894e-05
C9JES6	13.3359	1.14466e-06	3.50677e-05
C9JGB6	13.2348	3.69536e-07	1.99913e-05
F8WBX5	13.2348	3.69536e-07	1.99913e-05
A0A0A0MSJ2	13.0441	9.25317e-08	9.64159e-06
Q96P48-5	13.0441	9.25317e-08	9.64159e-06
E9PMB6	12.9635	4.07877e-07	2.08857e-05
C9JZ11	12.9372	3.90598e-07	2.01738e-05
B1APQ0	12.5417	7.07418e-06	0.00010681
C9J015	12.5333	8.37683e-08	8.94681e-06
P63167	12.5267	1.51845e-07	1.23087e-05
H3BR88	12.5254	5.63009e-06	9.17295e-05
Q8NF37	12.506	2.40161e-06	5.0697e-05
C9IYI6	12.352	1.46116e-06	3.97373e-05
C9JBA9	12.352	1.46116e-06	3.97373e-05
A0A2R8Y802	12.348	1.8882e-07	1.47774e-05
Q9BYZ2	12.3265	6.31511e-07	2.52342e-05
A0A087WXD1	12.3051	8.46937e-07	2.8912e-05
Q96T83	12.3051	8.46937e-07	2.8912e-05
A0A5F9ZH11	12.2938	2.83907e-07	1.81721e-05
A0A5F9ZHW9	12.2938	2.83907e-07	1.81721e-05
A0A5F9ZHX4	12.2938	2.83907e-07	1.81721e-05
P55201	12.2938	2.83907e-07	1.81721e-05
P55201-2	12.2938	2.83907e-07	1.81721e-05
P55201-3	12.2938	2.83907e-07	1.81721e-05
P55201-4	12.2938	2.83907e-07	1.81721e-05
A0A2R8YFR1	12.2858	3.23829e-07	1.93557e-05
C9J0S9	11.9183	8.26167e-06	0.000120379
A0A0A0MRM8	11.8784	2.54339e-07	1.70364e-05
A0A0D9SGC1	11.8784	2.54339e-07	1.70364e-05
A0A1Y0BRN3	11.8784	2.54339e-07	1.70364e-05
A0A590UJ40	11.8784	2.54339e-07	1.70364e-05
A0A590UJ75	11.8784	2.54339e-07	1.70364e-05
A0A590UKB0	11.8784	2.54339e-07	1.70364e-05
E7EW20	11.8784	2.54339e-07	1.70364e-05
Q9UM54	11.8784	2.54339e-07	1.70364e-05
Q9UM54-1	11.8784	2.54339e-07	1.70364e-05
Q9UM54-2	11.8784	2.54339e-07	1.70364e-05
Q9UM54-4	11.8784	2.54339e-07	1.70364e-05
Q9UM54-5	11.8784	2.54339e-07	1.70364e-05
Q9UM54-6	11.8784	2.54339e-07	1.70364e-05
H0YKA2	11.8758	2.01987e-06	4.59648e-05
H0YK42	11.8717	1.7845e-07	1.42141e-05
H0YAA0	11.8645	1.28345e-07	1.14199e-05
P20930	11.8537	5.88789e-06	9.4301e-05
C9JKM9	11.8469	1.01191e-07	9.91011e-06
Q9NPB8	11.6686	1.55493e-07	1.24966e-05
Q8NEV1	11.6679	1.29673e-07	1.14199e-05
Q5JUE9	11.5666	2.46922e-07	1.70364e-05
E9PK19	11.4546	2.87184e-06	5.71879e-05
E9PMA1	11.4546	2.87184e-06	5.71879e-05
E9PN88	11.4546	2.87184e-06	5.71879e-05
H0YCR6	11.4546	2.87184e-06	5.71879e-05
A0A087WZQ7	11.4071	1.20754e-07	1.14199e-05
Q9H115	11.4071	1.20754e-07	1.14199e-05
Q9H115-2	11.4071	1.20754e-07	1.14199e-05
Q9H115-3	11.4071	1.20754e-07	1.14199e-05
Q6P4A7	11.3747	2.47661e-07	1.70364e-05
Q6P4A7-3	11.3747	2.47661e-07	1.70364e-05
K7EJ34	11.3077	4.15923e-06	7.17437e-05
K7ELM8	11.3077	4.15923e-06	7.17437e-05
K7EMF4	11.3077	4.15923e-06	7.17437e-05
K7ENF4	11.3077	4.15923e-06	7.17437e-05
K7ENZ6	11.3077	4.15923e-06	7.17437e-05
A0A2R8Y5A0	11.2794	1.39816e-07	1.17643e-05
A0A2R8YD58	11.2794	1.39816e-07	1.17643e-05
A0A2R8YF43	11.2794	1.39816e-07	1.17643e-05
E7EU96	11.2794	1.39816e-07	1.17643e-05
P68400	11.2794	1.39816e-07	1.17643e-05
P53701	11.1387	1.24603e-06	3.67897e-05
H0YDD8	11.0931	1.97932e-07	1.52246e-05
Q13596-3	11.083	2.01918e-07	1.5399e-05
Q9H330	11.0072	1.87418e-07	1.4732e-05
Q9H330-4	11.0072	1.87418e-07	1.4732e-05
Q9H2V7-4	10.9813	1.23248e-06	3.65751e-05
A0A494C0A6	10.7955	2.42563e-06	5.09041e-05
K7EKS7	10.7639	1.33024e-07	1.15172e-05
K7EP65	10.7639	1.33024e-07	1.15172e-05
G3V4D9	10.6886	2.95558e-07	1.82655e-05
H0Y873	10.6498	3.87077e-07	2.00497e-05
Q96P47-5	10.6498	3.87077e-07	2.00497e-05
K7EQ60	10.5884	5.47845e-07	2.46077e-05
Q9BYV2	10.5632	1.724e-06	4.15849e-05
Q9BYV2-2	10.5632	1.724e-06	4.15849e-05
A0A024R7W5	10.5355	1.27977e-07	1.14199e-05
A0A087WY31	10.5355	1.27977e-07	1.14199e-05
A0A087X0Q1	10.5355	1.27977e-07	1.14199e-05
Q7Z739	10.5355	1.27977e-07	1.14199e-05
P11049	10.5322	3.62865e-07	1.99913e-05
P11049-2	10.5322	3.62865e-07	1.99913e-05
Q9NZL4	10.4208	2.55708e-07	1.70364e-05
Q9NZL4-2	10.4208	2.55708e-07	1.70364e-05
Q9NZL4-3	10.4208	2.55708e-07	1.70364e-05
A0A494C1S4	10.4052	1.58932e-07	1.2716e-05
K7EL96	10.3969	3.41167e-07	1.99913e-05
K7ERZ3	10.3455	3.17967e-07	1.91228e-05
K7ELC4	10.3425	1.46619e-07	1.22219e-05
K7EMH1	10.3425	1.46619e-07	1.22219e-05
A0A0U1RRL8	10.3118	3.19231e-05	0.000378677
Q8TB22	10.3118	3.19231e-05	0.000378677
Q8TB22-2	10.3118	3.19231e-05	0.000378677
Q8TB22-3	10.3118	3.19231e-05	0.000378677
Q8TB22-4	10.3118	3.19231e-05	0.000378677
K7ERI7	10.2026	1.51299e-07	1.23087e-05
P35268	10.2026	1.51299e-07	1.23087e-05
F5GXW1	10.1782	5.22153e-07	2.40714e-05
B8ZZI0	10.1739	5.29585e-07	2.42123e-05
Q5T0D2	10.1447	2.71287e-07	1.78095e-05
F8VZX1	10.1091	2.22629e-07	1.62856e-05
P53355	10.1032	2.36715e-07	1.70364e-05
P53355-3	10.1032	2.36715e-07	1.70364e-05
P53355-4	10.1032	2.36715e-07	1.70364e-05
A0A087X226	10.0177	4.90471e-07	2.36929e-05
Q16222	10.0177	4.90471e-07	2.36929e-05
Q16222-2	10.0177	4.90471e-07	2.36929e-05
Q16222-3	10.0177	4.90471e-07	2.36929e-05
A0A087X1R9	9.87136	6.52771e-07	2.53224e-05
H7C1L6	9.87136	6.52771e-07	2.53224e-05
E7ESM3	9.85868	2.70124e-07	1.78095e-05
G3V532	9.73958	1.97847e-07	1.52246e-05
F5GWU4	9.70189	3.3509e-07	1.98201e-05
H3BR29	9.67335	5.35206e-07	2.42835e-05
H3BSM7	9.67335	5.35206e-07	2.42835e-05
Q96GQ5	9.67335	5.35206e-07	2.42835e-05
Q15052	9.63597	9.63068e-07	3.10434e-05
Q15052-2	9.63597	9.63068e-07	3.10434e-05
Q6NUQ1	9.61781	1.98419e-06	4.54739e-05
C9JPW3	9.61448	1.9611e-07	1.52151e-05
A0A096LPE1	9.59922	6.96228e-07	2.59414e-05
M0R124	9.58627	1.36477e-05	0.000178796
H0YMC2	9.51968	2.54961e-07	1.70364e-05
H7BZK5	9.50826	1.91539e-07	1.4925e-05
A0A5F9ZHC6	9.50123	1.61226e-06	4.07544e-05
Q13596-2	9.49962	3.1795e-07	1.91228e-05
E7ERC4	9.48333	6.06865e-07	2.52342e-05
E9PGX9	9.48333	6.06865e-07	2.52342e-05
A0A087WZ51	9.45515	2.00724e-07	1.53734e-05
S4R3E5	9.43608	9.10944e-07	2.99425e-05
L7P8G6	9.39545	7.41629e-07	2.69604e-05
P42898	9.39545	7.41629e-07	2.69604e-05
P42898-2	9.39545	7.41629e-07	2.69604e-05
Q5SNW7	9.39545	7.41629e-07	2.69604e-05
E9PFP1	9.38634	7.63707e-07	2.74292e-05
O00459	9.38634	7.63707e-07	2.74292e-05
E9PKQ1	9.38628	3.03851e-07	1.85857e-05
E9PP63	9.38628	3.03851e-07	1.85857e-05
C9J5M2	9.36552	2.93229e-07	1.81843e-05
C9JLA8	9.36552	2.93229e-07	1.81843e-05
F8WAR0	9.36552	2.93229e-07	1.81843e-05
F8VVX6	9.34868	3.13924e-07	1.90717e-05
Q5HYK3	9.34868	3.13924e-07	1.90717e-05
E9PKT2	9.33983	1.81964e-07	1.44299e-05
Q13596	9.32153	3.23999e-07	1.93557e-05
H0YC89	9.26624	6.90429e-07	2.58327e-05
H0YCC4	9.26624	6.90429e-07	2.58327e-05
Q9BWS9-2	9.26624	6.90429e-07	2.58327e-05
Q9NX76	9.2644	6.60448e-07	2.55098e-05
A0A590UJY6	9.20813	8.16127e-07	2.832e-05
A0A590UK85	9.20813	8.16127e-07	2.832e-05
H3BPT8	9.14801	6.88516e-07	2.58327e-05
Q86YV9	9.09125	2.47595e-07	1.70364e-05
A0A5F9ZHM8	9.08935	1.69686e-06	4.11518e-05
P04424	9.08935	1.69686e-06	4.11518e-05
P04424-2	9.08935	1.69686e-06	4.11518e-05
P04424-3	9.08935	1.69686e-06	4.11518e-05
H7BZ20	9.04313	3.39141e-05	0.000400401
H7C312	9.04313	3.39141e-05	0.000400401
H7C2K2	9.0174	6.19128e-07	2.52342e-05
Q9NZQ3	9.0174	6.19128e-07	2.52342e-05
Q9NZQ3-2	9.0174	6.19128e-07	2.52342e-05
Q9NZQ3-3	9.0174	6.19128e-07	2.52342e-05
Q9NZQ3-4	9.0174	6.19128e-07	2.52342e-05
Q9NZQ3-5	9.0174	6.19128e-07	2.52342e-05
A8MY26	9.01309	1.27333e-05	0.000170685
O14972-2	9.01309	1.27333e-05	0.000170685
H0YJY6	8.93044	2.06464e-06	4.66613e-05
H7BZ44	8.93044	2.06464e-06	4.66613e-05
K7EPV0	8.90818	8.27166e-07	2.83994e-05
Q96P48-7	8.85352	3.57049e-07	1.99913e-05
A0A0A0MRH6	8.80825	1.11146e-06	3.46426e-05
H7BY83	8.78043	5.17446e-06	8.56295e-05
Q5JSH3	8.78043	5.17446e-06	8.56295e-05
Q5JSH3-2	8.78043	5.17446e-06	8.56295e-05
Q5JSH3-4	8.78043	5.17446e-06	8.56295e-05
Q6UX71	8.76617	9.07521e-07	2.98981e-05
Q6UX71-2	8.76617	9.07521e-07	2.98981e-05
E5RJU4	8.73614	3.61611e-07	1.99913e-05
E7EU13	8.72502	3.77605e-07	1.99913e-05
Q96P48	8.72502	3.77605e-07	1.99913e-05
Q96P48-1	8.72502	3.77605e-07	1.99913e-05
Q96P48-2	8.72502	3.77605e-07	1.99913e-05
Q96P48-3	8.72502	3.77605e-07	1.99913e-05
Q96P48-4	8.72502	3.77605e-07	1.99913e-05
A0A2R8YGB7	8.69624	4.64814e-07	2.314e-05
B1AXG2	8.69624	4.64814e-07	2.314e-05
Q86X83	8.68375	3.61749e-07	1.99913e-05
Q86X83-2	8.68375	3.61749e-07	1.99913e-05
H0Y9R3	8.68107	1.97026e-06	4.52124e-05
P35558-2	8.66623	8.88935e-06	0.000127248
A0A1B0GXG3	8.66285	2.13977e-06	4.7286e-05
E5RFL9	8.66285	2.13977e-06	4.7286e-05
E5RGZ0	8.66285	2.13977e-06	4.7286e-05
E5RHC8	8.66285	2.13977e-06	4.7286e-05
E5RHE8	8.66285	2.13977e-06	4.7286e-05
E5RI78	8.66285	2.13977e-06	4.7286e-05
E5RI95	8.66285	2.13977e-06	4.7286e-05
E5RIA5	8.66285	2.13977e-06	4.7286e-05
E5RIG4	8.66285	2.13977e-06	4.7286e-05
E5RIZ1	8.66285	2.13977e-06	4.7286e-05
E5RJJ6	8.66285	2.13977e-06	4.7286e-05
E5RJT1	8.66285	2.13977e-06	4.7286e-05
E5RK89	8.66285	2.13977e-06	4.7286e-05
J3QL48	8.63264	3.80989e-07	1.99913e-05
A0A1W2PP53	8.58006	3.5627e-06	6.59614e-05
A0A1W2PR73	8.58006	3.5627e-06	6.59614e-05
Q969N2-2	8.58006	3.5627e-06	6.59614e-05
H0Y320	8.54477	7.44852e-06	0.000110416
E9PNE7	8.54413	7.97634e-06	0.000116804
E9PNN7	8.54413	7.97634e-06	0.000116804
E9PRH4	8.54413	7.97634e-06	0.000116804
E9PSA8	8.54413	7.97634e-06	0.000116804
G3V1B2	8.54413	7.97634e-06	0.000116804
K4DIA9	8.54413	7.97634e-06	0.000116804
K4DIB5	8.54413	7.97634e-06	0.000116804
Q96H72	8.54413	7.97634e-06	0.000116804
Q96H72-2	8.54413	7.97634e-06	0.000116804
S4R359	8.46483	9.73945e-07	3.12044e-05
H0YN31	8.4535	5.6606e-07	2.52342e-05
A0A3B3IRE4	8.41371	1.57458e-06	4.03492e-05
Q6NSW5	8.41371	1.57458e-06	4.03492e-05
Q8TCE6	8.41371	1.57458e-06	4.03492e-05
Q8TCE6-2	8.41371	1.57458e-06	4.03492e-05
Q9NRD5	8.38797	7.48117e-07	2.70332e-05
I3L288	8.3871	6.84734e-07	2.58327e-05
I3NI21	8.3871	6.84734e-07	2.58327e-05
I3NI23	8.3871	6.84734e-07	2.58327e-05
Q96B96	8.3871	6.84734e-07	2.58327e-05
Q96B96-2	8.3871	6.84734e-07	2.58327e-05
Q9Y6C2	8.38307	3.00617e-07	1.85143e-05
G3V4R7	8.38086	1.86414e-05	0.00023745
Q15643	8.38086	1.86414e-05	0.00023745
Q15643-2	8.38086	1.86414e-05	0.00023745
H0YDG7	8.36131	6.48938e-07	2.52832e-05
Q8N511	8.36007	0.00027257	0.00289739
Q08J23	8.3491	3.71364e-07	1.99913e-05
Q08J23-2	8.3491	3.71364e-07	1.99913e-05
Q08J23-3	8.3491	3.71364e-07	1.99913e-05
F8WBW3	8.33943	9.62511e-07	3.10434e-05
Q8N8A2-5	8.33943	9.62511e-07	3.10434e-05
X6RI56	8.32378	6.57239e-07	2.54407e-05
G3V1W4	8.31333	3.67977e-07	1.99913e-05
G3V2R6	8.31333	3.67977e-07	1.99913e-05
G3V3G5	8.31333	3.67977e-07	1.99913e-05
G3V4V1	8.31333	3.67977e-07	1.99913e-05
P61457	8.28459	3.93459e-07	2.02632e-05
Q8N8A2-3	8.27648	7.08246e-07	2.62256e-05
H3BR82	8.21144	5.06208e-06	8.46293e-05
P30085	8.20017	5.38082e-07	2.42909e-05
P30085-3	8.20017	5.38082e-07	2.42909e-05
A2VDF0	8.16711	4.69086e-07	2.31597e-05
A2VDF0-2	8.16711	4.69086e-07	2.31597e-05
X6RK00	8.16711	4.69086e-07	2.31597e-05
H7C236	8.15244	2.90153e-07	1.81843e-05
H7C2J7	8.15244	2.90153e-07	1.81843e-05
C9JAG4	8.14186	2.89437e-06	5.72444e-05
C9JYV9	8.14186	2.89437e-06	5.72444e-05
O60664-3	8.11776	5.82958e-07	2.52342e-05
Q70J99	8.10983	3.71866e-07	1.99913e-05
Q70J99-3	8.10983	3.71866e-07	1.99913e-05
A0A3B3ITU1	8.09424	3.74644e-07	1.99913e-05
H0YK75	8.09424	3.74644e-07	1.99913e-05
K7ELU6	8.08358	4.83312e-07	2.36929e-05
P23919	8.05619	1.43347e-06	3.91028e-05
P23919-2	8.05619	1.43347e-06	3.91028e-05
A0A087X2D2	8.0282	3.04654e-06	5.94125e-05
P06727	8.01929	4.81546e-07	2.36929e-05
Q9NXC5	8.01025	9.06629e-07	2.98981e-05
E9PFL9	7.99786	8.1458e-07	2.832e-05
Q15814	7.96917	3.55568e-07	1.99913e-05
K7EJE9	7.96691	1.12473e-06	3.47818e-05
C9J4G7	7.94581	4.12048e-06	7.17437e-05
Q9Y4K1-2	7.9455	9.37934e-07	3.07306e-05
A0A3B3ISX8	7.88989	3.86811e-07	2.00497e-05
F8VWV8	7.88792	6.71817e-07	2.58327e-05
K7EM73	7.88635	3.15895e-07	1.91228e-05
J3KRX8	7.87671	2.7819e-06	5.60194e-05
J3KTA4	7.87671	2.7819e-06	5.60194e-05
J3KTQ4	7.87671	2.7819e-06	5.60194e-05
J3QR02	7.87671	2.7819e-06	5.60194e-05
J3QRQ7	7.87671	2.7819e-06	5.60194e-05
P17844	7.87671	2.7819e-06	5.60194e-05
P17844-2	7.87671	2.7819e-06	5.60194e-05
X6RLV5	7.87671	2.7819e-06	5.60194e-05
Q9Y2R0	7.82971	1.74845e-06	4.19487e-05
I3L2V0	7.81693	6.95816e-07	2.59414e-05
A0A087X0N2	7.7659	9.0322e-06	0.000128736
O15243	7.7659	9.0322e-06	0.000128736
G5E9E9	7.74873	5.09998e-07	2.38026e-05
Q9Y266	7.73923	4.54262e-07	2.2741e-05
K7EJY8	7.73543	1.36163e-06	3.77127e-05
P49753-2	7.72238	9.1221e-07	2.99425e-05
O14523	7.68861	4.64588e-06	7.86989e-05
O14523-2	7.68861	4.64588e-06	7.86989e-05
Q08257-2	7.66612	2.34202e-06	4.95745e-05
P50453	7.63833	1.13339e-06	3.47818e-05
C9JD65	7.60659	6.53942e-06	0.000101034
Q9GZY8	7.58975	3.82146e-05	0.000446177
Q9GZY8-2	7.58975	3.82146e-05	0.000446177
Q9GZY8-5	7.58975	3.82146e-05	0.000446177
H3BMF4	7.58813	6.1006e-06	9.65638e-05
Q9H2V7	7.58813	6.1006e-06	9.65638e-05
Q9H2V7-2	7.58813	6.1006e-06	9.65638e-05
Q9H2V7-3	7.58813	6.1006e-06	9.65638e-05
F2Z3L7	7.56264	3.80017e-05	0.00044456
U3KQ93	7.54257	5.53466e-07	2.4798e-05
A0A1W2PPC6	7.52684	1.83287e-06	4.33743e-05
Q9H3H5	7.52684	1.83287e-06	4.33743e-05
Q9H3H5-2	7.52684	1.83287e-06	4.33743e-05
Q9H3H5-3	7.52684	1.83287e-06	4.33743e-05
P78325	7.52281	1.6568e-06	4.10115e-05
P78325-2	7.52281	1.6568e-06	4.10115e-05
P78325-3	7.52281	1.6568e-06	4.10115e-05
H3BT13	7.51796	1.30054e-06	3.70561e-05
P62318	7.51796	1.30054e-06	3.70561e-05
P62318-2	7.51796	1.30054e-06	3.70561e-05
Q96DZ1	7.51346	1.1223e-06	3.47818e-05
Q96DZ1-2	7.51346	1.1223e-06	3.47818e-05
Q96DZ1-3	7.51346	1.1223e-06	3.47818e-05
H3BQ10	7.50821	6.99193e-07	2.59978e-05
B2RTY4	7.50261	3.85572e-06	6.8612e-05
B2RTY4-2	7.50261	3.85572e-06	6.8612e-05
B2RTY4-3	7.50261	3.85572e-06	6.8612e-05
B2RTY4-4	7.50261	3.85572e-06	6.8612e-05
B2RTY4-5	7.50261	3.85572e-06	6.8612e-05
H3BRD5	7.50261	3.85572e-06	6.8612e-05
Q96S99	7.37977	1.72634e-06	4.1585e-05
B7Z2U2	7.36516	7.93308e-07	2.80981e-05
F5H3S6	7.36516	7.93308e-07	2.80981e-05
Q6ZVM7	7.36516	7.93308e-07	2.80981e-05
Q6ZVM7-2	7.36516	7.93308e-07	2.80981e-05
Q6ZVM7-3	7.36516	7.93308e-07	2.80981e-05
Q6ZVM7-4	7.36516	7.93308e-07	2.80981e-05
Q6ZVM7-5	7.36516	7.93308e-07	2.80981e-05
Q96E11-2	7.35032	3.06255e-06	5.9595e-05
Q9BVK6	7.34006	2.88169e-06	5.71984e-05
Q8WUW1	7.3108	3.73989e-06	6.8612e-05
Q8WUW1-2	7.3108	3.73989e-06	6.8612e-05
A0A096LNZ0	7.27761	1.78264e-05	0.000229021
O60664-4	7.27246	8.04646e-07	2.832e-05
A0A0G2JH68	7.24444	5.08032e-07	2.37727e-05
A0A140T8Z0	7.24444	5.08032e-07	2.37727e-05
A0A2R8Y5N1	7.24444	5.08032e-07	2.37727e-05
H9KV28	7.24444	5.08032e-07	2.37727e-05
O60610	7.24444	5.08032e-07	2.37727e-05
O60610-2	7.24444	5.08032e-07	2.37727e-05
O60610-3	7.24444	5.08032e-07	2.37727e-05
A0A087X0Q9	7.24054	1.33299e-05	0.000175384
Q9BVL4	7.24054	1.33299e-05	0.000175384
H0YDX2	7.2305	1.90688e-05	0.000242721
Q96CN9	7.21367	1.53723e-06	4.03492e-05
Q96DB5-3	7.20607	7.48156e-07	2.70332e-05
H0Y599	7.19372	1.66216e-06	4.10115e-05
Q8N1I0	7.19372	1.66216e-06	4.10115e-05
Q8N1I0-2	7.19372	1.66216e-06	4.10115e-05
Q8N1I0-3	7.19372	1.66216e-06	4.10115e-05
Q5JNZ5	7.17254	8.15479e-06	0.000118918
F8VVB9	7.17194	2.96517e-06	5.82694e-05
Q9H853	7.17194	2.96517e-06	5.82694e-05
H0YE27	7.15866	1.47764e-05	0.0001919
H3BNG3	7.15866	1.47764e-05	0.0001919
K7EID2	7.15323	9.61069e-07	3.10434e-05
Q9BT22-2	7.15323	9.61069e-07	3.10434e-05
A0A5F9UK94	7.12226	1.17648e-06	3.56162e-05
H0Y360	7.12226	1.17648e-06	3.56162e-05
Q01433	7.12226	1.17648e-06	3.56162e-05
Q01433-2	7.12226	1.17648e-06	3.56162e-05
Q01433-3	7.12226	1.17648e-06	3.56162e-05
Q01433-4	7.12226	1.17648e-06	3.56162e-05
Q01433-5	7.12226	1.17648e-06	3.56162e-05
O60664	7.11921	8.56786e-07	2.91926e-05
Q9UNZ2-6	7.10921	8.74087e-07	2.9391e-05
K7EMK8	7.108	6.04005e-06	9.64793e-05
E9PS48	7.0528	1.32376e-06	3.71983e-05
O75489-2	7.0528	1.32376e-06	3.71983e-05
C9J338	7.05066	1.67928e-06	4.11518e-05
I3L2I2	7.05066	1.67928e-06	4.11518e-05
B4DVL2	6.99368	5.23816e-07	2.40714e-05
H0Y988	6.99368	5.23816e-07	2.40714e-05
Q02083	6.99368	5.23816e-07	2.40714e-05
Q02083-2	6.99368	5.23816e-07	2.40714e-05
R4GNC0	6.99368	5.23816e-07	2.40714e-05
Q9BTZ2-3	6.97559	4.15222e-07	2.12012e-05
O95551-3	6.95238	3.22696e-06	6.16563e-05
X6R5A3	6.95238	3.22696e-06	6.16563e-05
H0YDH3	6.91867	1.47403e-06	3.99056e-05
H0YED2	6.91867	1.47403e-06	3.99056e-05
Q9Y3Q8	6.90841	1.03287e-05	0.000144167
A0A0J9YWL0	6.88828	1.28555e-06	3.68939e-05
Q9Y4K1	6.88828	1.28555e-06	3.68939e-05
M0R301	6.87954	4.19633e-06	7.21753e-05
C9J3F8	6.86166	2.88194e-06	5.71984e-05
H7BXH3	6.86166	2.88194e-06	5.71984e-05
Q9H269-2	6.86121	6.77281e-07	2.58327e-05
Q86YZ3	6.82159	1.37039e-06	3.77127e-05
J3QRZ1	6.81822	3.01154e-06	5.88581e-05
Q9GZM8	6.81822	3.01154e-06	5.88581e-05
Q9GZM8-2	6.81822	3.01154e-06	5.88581e-05
Q9GZM8-3	6.81822	3.01154e-06	5.88581e-05
F6SFB5	6.81732	7.27712e-06	0.00010903
J3QRU1	6.80328	4.94429e-07	2.36929e-05
P06241	6.80328	4.94429e-07	2.36929e-05
P06241-2	6.80328	4.94429e-07	2.36929e-05
P06241-3	6.80328	4.94429e-07	2.36929e-05
P07947	6.80328	4.94429e-07	2.36929e-05
O14744-2	6.79688	9.53868e-07	3.10434e-05
O14744-3	6.79688	9.53868e-07	3.10434e-05
O14744-4	6.79688	9.53868e-07	3.10434e-05
P36551-2	6.76504	1.88059e-06	4.4173e-05
G3V2L5	6.73413	7.35009e-06	0.000109318
G3V434	6.73413	7.35009e-06	0.000109318
G3V4A6	6.73413	7.35009e-06	0.000109318
Q9UJY5-3	6.72961	8.0248e-07	2.83111e-05
A0A0D9SES7	6.72624	1.25385e-06	3.686e-05
A0A0D9SF91	6.72624	1.25385e-06	3.686e-05
H0Y8Z9	6.72499	3.54114e-06	6.57661e-05
E7ETE2	6.70084	7.46359e-07	2.70332e-05
B4DEZ3	6.69967	1.66041e-06	4.10115e-05
E7ENQ6	6.69967	1.66041e-06	4.10115e-05
K7EJE1	6.69967	1.66041e-06	4.10115e-05
Q9P0J0	6.69967	1.66041e-06	4.10115e-05
Q9P0J0-2	6.69967	1.66041e-06	4.10115e-05
U3KQP3	6.69967	1.66041e-06	4.10115e-05
H7C111	6.64533	5.27306e-07	2.41698e-05
Q9BT22	6.6221	8.62784e-07	2.92303e-05
Q16401	6.61773	6.47504e-07	2.52823e-05
Q16401-2	6.61773	6.47504e-07	2.52823e-05
Q9Y613	6.57737	1.39641e-06	3.82666e-05
H0Y746	6.56062	8.71969e-07	2.93749e-05
H0Y7V3	6.56062	8.71969e-07	2.93749e-05
E7EMS6	6.55227	3.84328e-06	6.8612e-05
B3KY94	6.54443	8.10023e-06	0.000118219
O14735-3	6.54443	8.10023e-06	0.000118219
E9PJ47	6.52189	5.85364e-07	2.52342e-05
E9PJX1	6.52189	5.85364e-07	2.52342e-05
E9PMQ3	6.52189	5.85364e-07	2.52342e-05
E9PNY1	6.52189	5.85364e-07	2.52342e-05
E9PQ47	6.52189	5.85364e-07	2.52342e-05
E9PQA5	6.52189	5.85364e-07	2.52342e-05
O95159	6.52189	5.85364e-07	2.52342e-05
Q9Y2D5	6.51897	7.27359e-07	2.66579e-05
Q9Y2D5-4	6.51897	7.27359e-07	2.66579e-05
Q9Y2D5-5	6.51897	7.27359e-07	2.66579e-05
Q9Y2D5-6	6.51897	7.27359e-07	2.66579e-05
Q9Y2D5-7	6.51897	7.27359e-07	2.66579e-05
Q9NUJ1-2	6.50636	9.15861e-06	0.00013027
B1AK20	6.46968	1.66743e-05	0.000214836
Q5TH61	6.46968	1.66743e-05	0.000214836
C9JZT2	6.46397	8.40996e-06	0.000121258
F8WBH4	6.46397	8.40996e-06	0.000121258
K7EL81	6.4624	3.86282e-06	6.8612e-05
Q9BZL4	6.4624	3.86282e-06	6.8612e-05
Q9BZL4-2	6.4624	3.86282e-06	6.8612e-05
Q9BZL4-3	6.4624	3.86282e-06	6.8612e-05
Q9BZL4-4	6.4624	3.86282e-06	6.8612e-05
Q86TM6	6.45743	4.06477e-05	0.000473044
Q86TM6-2	6.45743	4.06477e-05	0.000473044
Q86TM6-3	6.45743	4.06477e-05	0.000473044
P36268	6.42486	1.22064e-06	3.64606e-05
P36268-2	6.42486	1.22064e-06	3.64606e-05
P36268-3	6.42486	1.22064e-06	3.64606e-05
C9JCK5	6.41593	7.99409e-07	2.82584e-05
A0A3B3ITZ9	6.41102	1.55145e-05	0.00020108
Q9Y2W1	6.41102	1.55145e-05	0.00020108
F8W8A6	6.40032	3.50443e-06	6.52282e-05
H7C1A5	6.40032	3.50443e-06	6.52282e-05
K7EMU3	6.35673	5.76228e-07	2.52342e-05
E9PE82	6.34762	6.47162e-06	0.000100073
C9IZU8	6.31815	1.03975e-06	3.2865e-05
C9J9T0	6.31815	1.03975e-06	3.2865e-05
F8WBT4	6.31815	1.03975e-06	3.2865e-05
Q96AT9	6.31815	1.03975e-06	3.2865e-05
Q96AT9-2	6.31815	1.03975e-06	3.2865e-05
Q96AT9-4	6.31815	1.03975e-06	3.2865e-05
M0R0A9	6.31025	2.89704e-06	5.72444e-05
A8MYZ9	6.30418	3.58337e-06	6.62757e-05
A0A590UJ44	6.29992	6.26606e-07	2.52342e-05
A0A590UK69	6.29992	6.26606e-07	2.52342e-05
F5GYB0	6.29992	6.26606e-07	2.52342e-05
E9PFH4	6.28139	1.4726e-06	3.99056e-05
P05387	6.28047	1.06826e-06	3.36814e-05
O60906	6.26762	7.6172e-07	2.74292e-05
A0A087X1X9	6.26627	0.000205075	0.00219555
Q8IYB5	6.26627	0.000205075	0.00219555
B8ZZT4	6.25984	6.31871e-05	0.000715376
Q86VR2	6.24368	1.21758e-06	3.64606e-05
F8W1W1	6.22231	1.66362e-06	4.10115e-05
Q9BV40	6.20513	4.71968e-05	0.000544312
S4R314	6.20029	1.32584e-06	3.71983e-05
S4R352	6.20029	1.32584e-06	3.71983e-05
G3V0E5	6.19201	2.06914e-05	0.000260415
Q8N565	6.17575	6.952e-06	0.000105347
Q8N565-2	6.17575	6.952e-06	0.000105347
A0A087X0L7	6.17459	4.14056e-06	7.17437e-05
C9JC63	6.17459	4.14056e-06	7.17437e-05
E7EVY0	6.17459	4.14056e-06	7.17437e-05
J3KNA0	6.17459	4.14056e-06	7.17437e-05
Q15070	6.17459	4.14056e-06	7.17437e-05
Q15070-2	6.17459	4.14056e-06	7.17437e-05
Q15070-3	6.17459	4.14056e-06	7.17437e-05
F8VVI6	6.17407	1.83513e-06	4.33743e-05
A0A2R8Y5B3	6.16613	1.68049e-06	4.11518e-05
A0A1B0GTM0	6.16331	6.06493e-05	0.000688383
A0A494C1K6	6.1596	1.2909e-06	3.69578e-05
A0A2R8YCI2	6.15352	2.26405e-06	4.84783e-05
D6RF05	6.15352	2.26405e-06	4.84783e-05
E9PQ68	6.14526	8.49786e-06	0.000122034
K9J7I2	6.14526	8.49786e-06	0.000122034
O95169	6.14526	8.49786e-06	0.000122034
O95169-2	6.14526	8.49786e-06	0.000122034
O95169-3	6.14526	8.49786e-06	0.000122034
A0A087WT95	6.14349	1.69071e-06	4.11518e-05
A0A087X0W7	6.14349	1.69071e-06	4.11518e-05
P49753	6.14349	1.69071e-06	4.11518e-05
G3V3U4	6.14064	6.62832e-07	2.55468e-05
E9PKY6	6.12603	8.86288e-06	0.000126971
H0YCQ6	6.12603	8.86288e-06	0.000126971
O95758	6.11707	6.43456e-07	2.52342e-05
O95758-1	6.11707	6.43456e-07	2.52342e-05
O95758-2	6.11707	6.43456e-07	2.52342e-05
O95758-4	6.11707	6.43456e-07	2.52342e-05
O95758-5	6.11707	6.43456e-07	2.52342e-05
O95758-6	6.11707	6.43456e-07	2.52342e-05
O95758-7	6.11707	6.43456e-07	2.52342e-05
H0Y3Y3	6.11437	1.95002e-06	4.49459e-05
A0A087WVI0	6.09094	8.15126e-07	2.832e-05
E9PBL8	6.09094	8.15126e-07	2.832e-05
Q8WTW3	6.09094	8.15126e-07	2.832e-05
C9J6V3	6.08448	0.000114365	0.00124979
E9PJV5	6.08448	0.000114365	0.00124979
E9PSB4	6.08448	0.000114365	0.00124979
Q32P44-3	6.08448	0.000114365	0.00124979
E9PJ44	6.06257	8.60266e-07	2.92001e-05
E9PJB9	6.06257	8.60266e-07	2.92001e-05
P53985	6.05436	1.37409e-06	3.77127e-05
P53985-2	6.05436	1.37409e-06	3.77127e-05
Q5T8R3	6.05436	1.37409e-06	3.77127e-05
Q5T8R5	6.05436	1.37409e-06	3.77127e-05
H3BRS6	6.0402	0.00029964	0.0031701
Q15628	6.01257	1.54004e-06	4.03492e-05
Q15628-2	6.01257	1.54004e-06	4.03492e-05
Q9NUJ1-3	5.9977	2.10627e-05	0.00026383
K7EJL5	5.99575	3.85873e-06	6.8612e-05
K7EJV7	5.99575	3.85873e-06	6.8612e-05
K7EN19	5.99575	3.85873e-06	6.8612e-05
K7EPP7	5.99575	3.85873e-06	6.8612e-05
K7ER44	5.99575	3.85873e-06	6.8612e-05
A0A494C0B4	5.98567	1.26692e-06	3.686e-05
P54725	5.98567	1.26692e-06	3.686e-05
P54725-2	5.98567	1.26692e-06	3.686e-05
P54725-3	5.98567	1.26692e-06	3.686e-05
P11717	5.98314	3.17992e-06	6.13462e-05
A0A1B0GXJ2	5.9829	6.88542e-07	2.58327e-05
C9JFT1	5.9829	6.88542e-07	2.58327e-05
F8WB65	5.9829	6.88542e-07	2.58327e-05
B4DW98	5.96267	2.00409e-05	0.00025276
Q9NQ25-2	5.96267	2.00409e-05	0.00025276
Q9NQ25-7	5.96267	2.00409e-05	0.00025276
Q8IV04	5.94953	1.32473e-06	3.71983e-05
Q9Y2Z9	5.9494	4.0674e-06	7.14143e-05
Q9Y2Z9-3	5.9494	4.0674e-06	7.14143e-05
P86790	5.94331	1.12944e-06	3.47818e-05
Q5T440	5.9356	5.58302e-06	9.12113e-05
P23497	5.91315	8.66898e-07	2.93142e-05
Q6UWE0	5.91192	2.38151e-05	0.00029154
Q6UWE0-2	5.91192	2.38151e-05	0.00029154
B4DDD8	5.89926	1.1088e-06	3.46426e-05
P62854	5.87578	5.50228e-06	9.04696e-05
Q99943	5.86385	7.30029e-06	0.00010903
D6RER6	5.85447	4.85375e-06	8.12981e-05
Q9H269	5.85383	1.10121e-06	3.45639e-05
E9PII3	5.84358	1.55645e-06	4.03492e-05
O43491-2	5.84358	1.55645e-06	4.03492e-05
O43491-3	5.84358	1.55645e-06	4.03492e-05
A1L0T0	5.84211	5.60547e-06	9.14947e-05
Q9BS92	5.83162	2.99782e-05	0.000358418
A0A2R8YDJ1	5.80323	1.4934e-06	4.02477e-05
A0A494C1T7	5.79328	1.28614e-06	3.68939e-05
A0A087WWY0	5.79095	0.000679631	0.00697215
P08519	5.79095	0.000679631	0.00697215
A0A590UJX5	5.79037	2.81706e-06	5.64736e-05
F5GWI9	5.78808	9.05902e-07	2.98981e-05
F5GXZ7	5.78808	9.05902e-07	2.98981e-05
F5GZ97	5.78808	9.05902e-07	2.98981e-05
H0YGN0	5.78808	9.05902e-07	2.98981e-05
Q9Y3C0	5.78808	9.05902e-07	2.98981e-05
Q9Y5L0	5.78264	1.23526e-06	3.65751e-05
Q9Y5L0-3	5.78264	1.23526e-06	3.65751e-05
H0YC95	5.77867	7.03208e-05	0.000792137
B1AHA8	5.77319	2.77787e-06	5.60194e-05
B5MCK8	5.75424	8.45654e-07	2.8912e-05
P34059	5.75189	1.224e-06	3.65001e-05
D6RDG2	5.74825	8.23276e-07	2.832e-05
D6RDY5	5.74825	8.23276e-07	2.832e-05
Q5HYF5	5.74825	8.23276e-07	2.832e-05
Q8TEA7	5.74825	8.23276e-07	2.832e-05
Q8TEA7-2	5.74825	8.23276e-07	2.832e-05
Q8TEA7-3	5.74825	8.23276e-07	2.832e-05
A0A087WX97	5.74467	6.82774e-06	0.000103877
Q9BXK5	5.74467	6.82774e-06	0.000103877
Q9BXK5-2	5.74467	6.82774e-06	0.000103877
H0Y4Q3	5.72648	1.42442e-06	3.89749e-05
A0A087WWR6	5.71173	1.5571e-06	4.03492e-05
C9JVG0	5.69908	1.67945e-05	0.000216229
Q5RI15	5.69343	1.11044e-06	3.46426e-05
Q5RI15-2	5.69343	1.11044e-06	3.46426e-05
P09601	5.68532	2.33696e-06	4.95656e-05
M0R026	5.67537	6.70482e-06	0.000102968
A0A0A0MSS4	5.66354	1.2041e-06	3.62078e-05
A0A0A0MSU9	5.66354	1.2041e-06	3.62078e-05
A0A494C0A9	5.66201	1.33884e-06	3.72589e-05
Q13951	5.66201	1.33884e-06	3.72589e-05
Q13951-2	5.66201	1.33884e-06	3.72589e-05
P51798	5.65637	2.09902e-05	0.000263252
P51798-2	5.65637	2.09902e-05	0.000263252
P12110	5.65224	9.68441e-06	0.00013688
P12110-2	5.65224	9.68441e-06	0.00013688
P12110-3	5.65224	9.68441e-06	0.00013688
H0Y9X9	5.64836	3.89692e-05	0.000454691
A0A0A0MQU3	5.64316	2.64909e-06	5.4634e-05
P62837	5.64316	2.64909e-06	5.4634e-05
H7C4A0	5.63425	2.02426e-06	4.59806e-05
Q9UMX5	5.6204	3.01697e-06	5.89e-05
O75131	5.61194	1.28662e-06	3.68939e-05
H3BQ53	5.61058	6.6783e-06	0.000102649
H3BRP4	5.61058	6.6783e-06	0.000102649
H3BSS3	5.61058	6.6783e-06	0.000102649
Q9BQ70	5.61058	6.6783e-06	0.000102649
Q9H384	5.61058	6.6783e-06	0.000102649
Q15126	5.60845	9.65834e-07	3.10766e-05
E7ETR0	5.59919	1.13207e-06	3.47818e-05
Q9Y265	5.59919	1.13207e-06	3.47818e-05
Q9Y265-2	5.59919	1.13207e-06	3.47818e-05
H3BPE4	5.59665	2.44552e-06	5.12017e-05
O15229	5.59424	1.11761e-05	0.000153251
O15229-2	5.59424	1.11761e-05	0.000153251
O15229-3	5.59424	1.11761e-05	0.000153251
F5GXD8	5.59343	4.72121e-06	7.98994e-05
O95551	5.59249	3.5049e-06	6.52282e-05
O95551-2	5.59249	3.5049e-06	6.52282e-05
A0A494BZZ1	5.5822	1.65189e-06	4.10115e-05
Q15836	5.56756	1.7743e-05	0.000228113
C9JAL9	5.56679	3.05374e-06	5.94881e-05
K7EIU0	5.55964	1.92181e-06	4.48461e-05
F5H1M6	5.52782	1.12515e-05	0.000153462
F6SFZ6	5.52782	1.12515e-05	0.000153462
Q99571	5.52782	1.12515e-05	0.000153462
Q99571-2	5.52782	1.12515e-05	0.000153462
Q99571-3	5.52782	1.12515e-05	0.000153462
P53355-2	5.52606	4.51735e-06	7.67393e-05
P32456	5.5235	2.44549e-06	5.12017e-05
Q6PCE3	5.49676	1.96179e-06	4.50758e-05
Q96Q11	5.47097	2.77126e-06	5.60194e-05
Q96Q11-2	5.47097	2.77126e-06	5.60194e-05
Q9Y5L0-5	5.47063	1.34639e-06	3.74108e-05
P15289-2	5.46045	3.85575e-06	6.8612e-05
A0A087WUR6	5.45833	1.13635e-05	0.000154178
Q8IU85	5.45833	1.13635e-05	0.000154178
Q8IU85-2	5.45833	1.13635e-05	0.000154178
O75533	5.45526	1.50587e-06	4.03492e-05
Q9UKE5	5.4386	1.95362e-06	4.49459e-05
Q9UKE5-2	5.4386	1.95362e-06	4.49459e-05
Q9UKE5-3	5.4386	1.95362e-06	4.49459e-05
Q9UKE5-4	5.4386	1.95362e-06	4.49459e-05
Q9UKE5-5	5.4386	1.95362e-06	4.49459e-05
Q9UKE5-6	5.4386	1.95362e-06	4.49459e-05
Q9UKE5-7	5.4386	1.95362e-06	4.49459e-05
Q9UKE5-8	5.4386	1.95362e-06	4.49459e-05
H0YN00	5.42827	1.02345e-06	3.26958e-05
Q08211	5.42158	1.06194e-05	0.000147422
D6RF87	5.41886	4.79872e-05	0.000553072
P19525	5.36906	1.27454e-06	3.68939e-05
P19525-2	5.36906	1.27454e-06	3.68939e-05
A0A0D9SFI9	5.36644	0.000148642	0.00161257
I3L4U9	5.36644	0.000148642	0.00161257
O75886	5.35684	1.32747e-06	3.71983e-05
O75886-2	5.35684	1.32747e-06	3.71983e-05
F2Z2Q6	5.35545	1.12277e-05	0.000153462
F2Z3P7	5.35545	1.12277e-05	0.000153462
C9J7E5	5.35444	1.71518e-06	4.14836e-05
Q9Y5L0-1	5.35444	1.71518e-06	4.14836e-05
Q13442	5.34939	2.49741e-05	0.000305103
E9PRK2	5.34586	1.3302e-06	3.71983e-05
Q96I59	5.34586	1.3302e-06	3.71983e-05
P02786	5.34248	3.49136e-05	0.00041116
Q5JTW6	5.33654	2.6823e-06	5.50685e-05
F8WDD5	5.32526	1.23672e-06	3.65751e-05
F8WEZ6	5.32526	1.23672e-06	3.65751e-05
F8WF66	5.32234	1.16877e-05	0.00015714
A0A384DVP2	5.31794	2.00315e-06	4.57332e-05
Q6UXS9	5.31794	2.00315e-06	4.57332e-05
Q6UXS9-3	5.31794	2.00315e-06	4.57332e-05
A0A3B3IRQ5	5.2985	1.761e-06	4.1969e-05
C9JA29	5.2985	1.761e-06	4.1969e-05
F2Z3F0	5.2985	1.761e-06	4.1969e-05
F8WDT1	5.2985	1.761e-06	4.1969e-05
Q96JG6-2	5.2985	1.761e-06	4.1969e-05
A0A669KBK4	5.29122	1.07262e-05	0.000148789
A0A140T9Q4	5.28582	0.000801275	0.00817328
A0A140TA19	5.28582	0.000801275	0.00817328
A0A590UJ74	5.27696	3.40663e-06	6.41319e-05
Q9UPY6	5.27696	3.40663e-06	6.41319e-05
Q9UPY6-2	5.27696	3.40663e-06	6.41319e-05
Q6PL24	5.26636	4.20696e-06	7.22888e-05
C9JY63	5.2605	2.8133e-06	5.64614e-05
E5RFD1	5.2605	2.8133e-06	5.64614e-05
H7C0K6	5.25877	1.19657e-06	3.61026e-05
O43896	5.25877	1.19657e-06	3.61026e-05
P12081	5.25631	1.37065e-06	3.77127e-05
P12081-4	5.25631	1.37065e-06	3.77127e-05
B4DVF4	5.25403	1.2462e-05	0.000167299
H7BZ35	5.24935	1.65896e-06	4.10115e-05
C9JU58	5.21605	2.94076e-06	5.79805e-05
Q5JRA6-4	5.2034	5.85447e-06	9.40177e-05
E9PPC9	5.20132	3.90051e-06	6.91443e-05
Q6ZSX4	5.20132	3.90051e-06	6.91443e-05
Q7Z319	5.19046	5.62929e-06	9.17295e-05
Q14141-3	5.179	2.20652e-06	4.77886e-05
E5RII8	5.176	4.50932e-06	7.66755e-05
H7C3X0	5.17152	1.58795e-06	4.03492e-05
O60502	5.17152	1.58795e-06	4.03492e-05
O60502-2	5.17152	1.58795e-06	4.03492e-05
O60502-3	5.17152	1.58795e-06	4.03492e-05
O60502-4	5.17152	1.58795e-06	4.03492e-05
V9GZ14	5.15129	1.20113e-05	0.000161369
Q96I24	5.14527	1.31052e-06	3.71983e-05
Q13057	5.13861	1.68309e-06	4.11518e-05
Q13057-2	5.13861	1.68309e-06	4.11518e-05
F5H6E2	5.12831	1.51049e-06	4.03492e-05
O00159	5.12831	1.51049e-06	4.03492e-05
O00159-2	5.12831	1.51049e-06	4.03492e-05
O00159-3	5.12831	1.51049e-06	4.03492e-05
C9J035	5.12386	6.80767e-06	0.000103836
C9J722	5.12386	6.80767e-06	0.000103836
C9J9M9	5.12386	6.80767e-06	0.000103836
C9JVC2	5.12386	6.80767e-06	0.000103836
H0Y2L7	5.12148	3.70695e-05	0.00043536
A0A590UK28	5.11223	4.14788e-06	7.17437e-05
A0A590UKA4	5.11223	4.14788e-06	7.17437e-05
B0YIZ1	5.09636	6.79171e-06	0.000103836
H7C2A1	5.09636	6.79171e-06	0.000103836
Q0VDF9	5.09636	6.79171e-06	0.000103836
E9PMY0	5.09139	2.10981e-06	4.7286e-05
E9PNB3	5.09139	2.10981e-06	4.7286e-05
E9PLU0	5.08556	4.23415e-06	7.24087e-05
E9PRI6	5.08556	4.23415e-06	7.24087e-05
O00330	5.08556	4.23415e-06	7.24087e-05
O00330-3	5.08556	4.23415e-06	7.24087e-05
I3L2H6	5.08549	1.1151e-05	0.000153251
I3L2Q9	5.08549	1.1151e-05	0.000153251
Q9H2F3-2	5.08549	1.1151e-05	0.000153251
P29803	5.06346	2.0909e-05	0.000262601
I3L1S3	5.0542	1.26471e-06	3.686e-05
A0A0J9YXF2	5.05299	3.96026e-06	6.97893e-05
Q15165	5.05299	3.96026e-06	6.97893e-05
Q15165-1	5.05299	3.96026e-06	6.97893e-05
Q15165-3	5.05299	3.96026e-06	6.97893e-05
P17252	5.04604	2.3141e-06	4.94908e-05
E9PQL0	5.04242	3.10656e-06	6.02552e-05
Q86UB9	5.04242	3.10656e-06	6.02552e-05
Q86UB9-2	5.04242	3.10656e-06	6.02552e-05
A0A0U1RRK1	5.03477	2.70088e-06	5.50685e-05
A0A286YF11	5.03477	2.70088e-06	5.50685e-05
F6XEV2	5.03477	2.70088e-06	5.50685e-05
Q9BPX6	5.03477	2.70088e-06	5.50685e-05
Q9BPX6-2	5.03477	2.70088e-06	5.50685e-05
Q9BPX6-3	5.03477	2.70088e-06	5.50685e-05
S4R3D7	5.03477	2.70088e-06	5.50685e-05
S4R3V1	5.03477	2.70088e-06	5.50685e-05
B1AH48	5.0227	0.000422474	0.00440977
Q9UL42	5.0227	0.000422474	0.00440977
I3L4A6	5.019	1.28516e-06	3.68939e-05
Q8NB16	5.019	1.28516e-06	3.68939e-05
P30044-3	5.01627	1.28082e-06	3.68939e-05
A0A0G2JKF1	5.00704	1.33044e-06	3.71983e-05
E9PK45	4.99907	2.25062e-06	4.83062e-05
E9PKM5	4.99907	2.25062e-06	4.83062e-05
E9PQR3	4.99907	2.25062e-06	4.83062e-05
A0A590UJE1	4.9914	3.47263e-06	6.49679e-05
A2RRP1	4.98937	1.47947e-06	3.99322e-05
A2RRP1-2	4.98937	1.47947e-06	3.99322e-05
O15020	4.98933	8.03904e-06	0.000117517
O15020-2	4.98933	8.03904e-06	0.000117517
Q99615-2	4.98143	5.12209e-06	8.53936e-05
E7ESK7	4.97579	0.000177759	0.00192379
O14879	4.97495	3.7852e-06	6.8612e-05
Q63HN8-5	4.97252	4.10412e-06	7.17437e-05
P35998-2	4.96486	1.92426e-06	4.48461e-05
F2Z2B1	4.96335	2.33447e-06	4.95656e-05
A0A087WYD0	4.94074	1.44354e-05	0.000188291
H7C568	4.94074	1.44354e-05	0.000188291
E9PIK4	4.93188	1.59173e-06	4.03492e-05
E9PIN5	4.93188	1.59173e-06	4.03492e-05
E9PKN9	4.93188	1.59173e-06	4.03492e-05
E9PKZ4	4.93188	1.59173e-06	4.03492e-05
E9PMW4	4.93188	1.59173e-06	4.03492e-05
E9PN66	4.93188	1.59173e-06	4.03492e-05
E9PPM1	4.93188	1.59173e-06	4.03492e-05
E9PQ46	4.93188	1.59173e-06	4.03492e-05
E9PS55	4.93188	1.59173e-06	4.03492e-05
O14683	4.93188	1.59173e-06	4.03492e-05
U3KQ32	4.93188	1.59173e-06	4.03492e-05
C9JCX1	4.93028	1.63725e-06	4.10115e-05
H7C4Y1	4.93028	1.63725e-06	4.10115e-05
G3V2U3	4.92889	1.59152e-06	4.03492e-05
H0YJ75	4.92889	1.59152e-06	4.03492e-05
Q13362	4.92889	1.59152e-06	4.03492e-05
Q13362-2	4.92889	1.59152e-06	4.03492e-05
Q13362-3	4.92889	1.59152e-06	4.03492e-05
Q13362-4	4.92889	1.59152e-06	4.03492e-05
Q13362-5	4.92889	1.59152e-06	4.03492e-05
Q96B13	4.92889	1.59152e-06	4.03492e-05
A0A0G2JIF0	4.92606	0.000544853	0.00565095
A0A1W2PS56	4.92606	0.000544853	0.00565095
A2BF26	4.92606	0.000544853	0.00565095
K7EMV1	4.90134	2.52404e-06	5.25536e-05
H3BS53	4.87009	1.73756e-06	4.17434e-05
D6RB97	4.86834	3.66447e-06	6.7497e-05
D6RBC6	4.86834	3.66447e-06	6.7497e-05
Q9UID3	4.86469	1.56097e-06	4.03492e-05
Q9UID3-2	4.86469	1.56097e-06	4.03492e-05
H0YAM9	4.85777	3.44805e-06	6.47078e-05
C9JUD5	4.84504	1.11712e-05	0.000153251
F8WFC3	4.84504	1.11712e-05	0.000153251
B3KQ30	4.82212	1.99054e-05	0.000252473
B4DNC9	4.82212	1.99054e-05	0.000252473
F5H5N2	4.82212	1.99054e-05	0.000252473
Q9H1K1	4.82212	1.99054e-05	0.000252473
H7C2S8	4.82197	6.71444e-06	0.000103028
E9PNG3	4.82186	2.04521e-06	4.63978e-05
J3QS83	4.8139	2.50561e-06	5.23375e-05
H7C0V8	4.80336	9.50878e-06	0.000134716
H7C4C4	4.80336	9.50878e-06	0.000134716
A0A0D9SEM9	4.79786	1.86455e-06	4.38536e-05
A0A140T9K2	4.79786	1.86455e-06	4.38536e-05
A0A140T9N3	4.79786	1.86455e-06	4.38536e-05
Q8WUK0-2	4.79729	0.000220572	0.00236006
Q96F24	4.79425	2.55375e-06	5.27894e-05
Q96F24-2	4.79425	2.55375e-06	5.27894e-05
Q96F24-3	4.79425	2.55375e-06	5.27894e-05
A6NE76	4.7883	9.8085e-06	0.000138307
B3KWE1	4.77854	1.94974e-06	4.49459e-05
H3BTH6	4.77754	3.08525e-05	0.000367645
Q8NEZ5	4.77754	3.08525e-05	0.000367645
Q8NEZ5-3	4.77754	3.08525e-05	0.000367645
A0A2R8Y5N2	4.77704	2.18154e-06	4.77886e-05
A0A2R8Y5S3	4.77704	2.18154e-06	4.77886e-05
A0A2R8Y6S1	4.77704	2.18154e-06	4.77886e-05
A0A2R8YFV7	4.77704	2.18154e-06	4.77886e-05
Q92574	4.77704	2.18154e-06	4.77886e-05
Q92574-2	4.77704	2.18154e-06	4.77886e-05
R4GMV4	4.77052	2.80468e-06	5.64148e-05
B7Z4C8	4.76515	3.86216e-06	6.8612e-05
B7Z4E3	4.76515	3.86216e-06	6.8612e-05
B8ZZK4	4.76515	3.86216e-06	6.8612e-05
C9JU56	4.76515	3.86216e-06	6.8612e-05
H7C2W9	4.76515	3.86216e-06	6.8612e-05
P62899-2	4.76515	3.86216e-06	6.8612e-05
P62899-3	4.76515	3.86216e-06	6.8612e-05
Q9NUJ1	4.76442	4.08091e-05	0.000474614
H0YER3	4.76357	4.45664e-06	7.58518e-05
Q8NB37-3	4.76357	4.45664e-06	7.58518e-05
Q9HB90	4.75912	2.91655e-06	5.75665e-05
E7ENQ8	4.7587	5.47632e-06	9.01625e-05
Q5JRA6	4.75132	5.80754e-06	9.34316e-05
Q5JRA6-2	4.75132	5.80754e-06	9.34316e-05
F8WCH0	4.74572	1.41835e-05	0.000185275
Q8IY17-5	4.74407	2.18732e-06	4.77886e-05
Q5JVZ8	4.73809	2.02099e-06	4.59648e-05
B1AKP8	4.71937	2.65783e-06	5.47513e-05
H0Y562	4.70744	1.78531e-05	0.000229036
H0Y6E5	4.70744	1.78531e-05	0.000229036
O60333-3	4.70678	1.72865e-06	4.1585e-05
Q9Y282-2	4.70484	3.06603e-05	0.00036633
Q9H845	4.70374	1.65776e-05	0.000214051
A0A0U1RQH7	4.69711	0.00215709	0.0215612
A0A0U1RQW2	4.69711	0.00215709	0.0215612
G3XAC6	4.69711	0.00215709	0.0215612
H0Y4X3	4.69711	0.00215709	0.0215612
Q14498	4.69711	0.00215709	0.0215612
Q14498-2	4.69711	0.00215709	0.0215612
Q14498-3	4.69711	0.00215709	0.0215612
P04920	4.69414	2.41711e-06	5.07848e-05
P04920-2	4.69414	2.41711e-06	5.07848e-05
P04920-3	4.69414	2.41711e-06	5.07848e-05
D6RH20	4.69139	0.000419318	0.00438194
G5EA06	4.69139	0.000419318	0.00438194
Q92552	4.69139	0.000419318	0.00438194
Q92552-2	4.69139	0.000419318	0.00438194
H0YJP2	4.68806	2.06091e-06	4.66613e-05
H7C0Q6	4.68792	5.55575e-06	9.08486e-05
Q9C037-3	4.68792	5.55575e-06	9.08486e-05
J3QRM1	4.68169	7.97722e-06	0.000116804
Q96JB5-3	4.68169	7.97722e-06	0.000116804
G3V185	4.68122	2.48637e-05	0.000303962
G3V5E5	4.66216	2.13409e-06	4.7286e-05
H0YJJ8	4.66216	2.13409e-06	4.7286e-05
K7EK03	4.65428	2.52768e-06	5.25536e-05
K7ELJ8	4.65428	2.52768e-06	5.25536e-05
K7ESP1	4.65428	2.52768e-06	5.25536e-05
G3V195	4.64223	3.47441e-06	6.49679e-05
G3V3I1	4.64048	1.8915e-06	4.43711e-05
A0A3B3IRM4	4.617	4.24289e-05	0.000491221
O75191	4.617	4.24289e-05	0.000491221
O75191-2	4.617	4.24289e-05	0.000491221
Q9Y2Q5	4.61418	3.35964e-06	6.35142e-05
Q96S52	4.60978	1.14608e-05	0.000154786
Q96S52-2	4.60978	1.14608e-05	0.000154786
B4DEM9	4.59092	1.83691e-06	4.33743e-05
Q9Y2S7	4.59092	1.83691e-06	4.33743e-05
Q9UBF2	4.573	3.14011e-06	6.06434e-05
Q9UBF2-2	4.573	3.14011e-06	6.06434e-05
Q14677	4.57253	1.92426e-06	4.48461e-05
Q14677-2	4.57253	1.92426e-06	4.48461e-05
Q14677-3	4.57253	1.92426e-06	4.48461e-05
H7C3J0	4.56737	2.08163e-06	4.6986e-05
A0A1W2PPS8	4.56199	2.30582e-05	0.00028402
H0Y5K5	4.56199	2.30582e-05	0.00028402
H0Y621	4.56199	2.30582e-05	0.00028402
Q9Y282	4.56199	2.30582e-05	0.00028402
Q9Y282-3	4.56199	2.30582e-05	0.00028402
C9J5W5	4.55216	3.29046e-06	6.25361e-05
C9JRV9	4.55216	3.29046e-06	6.25361e-05
F8W0U6	4.54159	5.64573e-06	9.19008e-05
A0A0G2JH50	4.53083	0.000529275	0.00550532
Q5RIP0	4.53083	0.000529275	0.00550532
Q8N573-3	4.52931	2.34291e-06	4.95745e-05
K7ERP6	4.51324	2.88847e-06	5.72444e-05
Q96T76-5	4.50367	4.22715e-06	7.24087e-05
A0A0G2JNQ3	4.50316	6.17238e-06	9.65638e-05
A0A0G2JPF8	4.50316	6.17238e-06	9.65638e-05
B2RXH8	4.50316	6.17238e-06	9.65638e-05
B4DSU6	4.50316	6.17238e-06	9.65638e-05
B7ZW38	4.50316	6.17238e-06	9.65638e-05
G3V251	4.50316	6.17238e-06	9.65638e-05
G3V3K6	4.50316	6.17238e-06	9.65638e-05
G3V5X6	4.50316	6.17238e-06	9.65638e-05
O60812	4.50316	6.17238e-06	9.65638e-05
A0A2R8YGW0	4.50019	1.01429e-05	0.000141795
P51795	4.50019	1.01429e-05	0.000141795
P51795-2	4.50019	1.01429e-05	0.000141795
P62899	4.49976	5.24268e-06	8.66784e-05
D6RHZ7	4.49438	1.12623e-05	0.000153493
C9JEH3	4.48531	5.54977e-06	9.08486e-05
C9JG97	4.48531	5.54977e-06	9.08486e-05
C9JTS3	4.48531	5.54977e-06	9.08486e-05
Q13685	4.48531	5.54977e-06	9.08486e-05
O00391	4.48085	4.07239e-06	7.14143e-05
O00391-2	4.48085	4.07239e-06	7.14143e-05
P01034	4.47962	5.87551e-06	9.42712e-05
P49770	4.47911	2.01027e-06	4.58373e-05
H7C5K5	4.47662	2.45265e-06	5.1291e-05
A6NFY0	4.47475	3.94572e-06	6.97893e-05
O60826	4.47431	2.32034e-06	4.95377e-05
Q5T0R8	4.46809	7.85788e-06	0.0001161
O14976	4.46807	3.66218e-06	6.7497e-05
O14976-2	4.46807	3.66218e-06	6.7497e-05
Q9BVV7	4.45969	3.65505e-05	0.000429546
O15530-2	4.44766	3.76133e-06	6.8612e-05
A0A1W2PQK0	4.43903	2.41383e-06	5.07848e-05
P78318	4.43371	2.39512e-06	5.06196e-05
J3QRL5	4.43307	3.11731e-06	6.03984e-05
Q86TX2	4.43136	7.32912e-06	0.000109288
Q9Y5K6	4.4208	1.35992e-05	0.000178292
B3KNS5	4.4205	2.33011e-06	4.95377e-05
Q8WVR3	4.4205	2.33011e-06	4.95377e-05
Q8WVR3-2	4.4205	2.33011e-06	4.95377e-05
Q8WVR3-3	4.4205	2.33011e-06	4.95377e-05
Q8IY17-2	4.41911	5.83249e-06	9.37488e-05
A0A499FIS5	4.41665	5.73411e-06	9.27497e-05
A0A499FJN1	4.41665	5.73411e-06	9.27497e-05
A0A499FJS1	4.41665	5.73411e-06	9.27497e-05
E9PIA0	4.41665	5.73411e-06	9.27497e-05
Q9BUB5	4.41665	5.73411e-06	9.27497e-05
Q9BUB5-2	4.41665	5.73411e-06	9.27497e-05
Q9BUB5-3	4.41665	5.73411e-06	9.27497e-05
J3KST8	4.40819	2.10657e-05	0.00026383
Q96JB5-2	4.3826	1.55393e-05	0.00020108
Q02218-3	4.38162	4.55289e-05	0.000525753
B4DZG7	4.35221	2.9554e-06	5.82052e-05
A0A2R8Y4W2	4.34664	6.16195e-06	9.65638e-05
A0A2R8YE63	4.34664	6.16195e-06	9.65638e-05
Q12929	4.34664	6.16195e-06	9.65638e-05
Q12929-2	4.34664	6.16195e-06	9.65638e-05
A0A3B3IS54	4.34173	1.71341e-05	0.000220444
B3KSI3	4.33772	0.000307414	0.00324851
O15382-2	4.33772	0.000307414	0.00324851
H0YGB8	4.33589	1.1677e-05	0.000157113
A0A2R8Y6A3	4.3199	1.98935e-05	0.000252473
H7C2Y1	4.31687	7.29437e-06	0.00010903
Q14669	4.31687	7.29437e-06	0.00010903
Q14669-2	4.31687	7.29437e-06	0.00010903
Q14669-3	4.31687	7.29437e-06	0.00010903
Q14669-4	4.31687	7.29437e-06	0.00010903
P49754	4.31622	6.18135e-06	9.65638e-05
P49754-2	4.31622	6.18135e-06	9.65638e-05
P49754-3	4.31622	6.18135e-06	9.65638e-05
O15294-4	4.31312	4.86487e-06	8.14083e-05
A0A0A0MS96	4.28956	1.33716e-05	0.000175436
P46736-5	4.28956	1.33716e-05	0.000175436
C9JQM7	4.28409	6.44902e-05	0.000727201
H0Y8X1	4.28378	0.000150538	0.00163215
Q8WZA9	4.28106	6.07906e-06	9.65638e-05
Q9UNZ2-4	4.27032	5.07808e-06	8.48177e-05
O75937	4.26821	1.80906e-05	0.000231752
S4R3J5	4.26821	1.80906e-05	0.000231752
A6PVN3	4.26787	3.78972e-06	6.8612e-05
B7ZBP5	4.26787	3.78972e-06	6.8612e-05
F8W9F8	4.26086	2.86587e-05	0.000344251
Q5T0W7	4.26086	2.86587e-05	0.000344251
Q8TBY0	4.26086	2.86587e-05	0.000344251
Q8TBY0-2	4.26086	2.86587e-05	0.000344251
Q8TBY0-3	4.26086	2.86587e-05	0.000344251
Q9NQ94	4.26086	2.86587e-05	0.000344251
Q9NQ94-2	4.26086	2.86587e-05	0.000344251
Q9NQ94-3	4.26086	2.86587e-05	0.000344251
Q9NQ94-4	4.26086	2.86587e-05	0.000344251
Q9NQ94-5	4.26086	2.86587e-05	0.000344251
Q9NQ94-6	4.26086	2.86587e-05	0.000344251
A0A3B3ITK9	4.24998	3.4789e-05	0.00041019
O75489	4.24818	1.3909e-05	0.000181954
A0A0C4DGL4	4.24587	7.54011e-05	0.000843532
Q01650	4.24587	7.54011e-05	0.000843532
Q92536	4.24587	7.54011e-05	0.000843532
O60524-5	4.24512	6.01869e-06	9.62238e-05
Q9H2F3	4.24504	3.95734e-06	6.97893e-05
E9PPP8	4.24131	3.41186e-05	0.000402551
A0A2R8YDT1	4.23967	2.82742e-06	5.65548e-05
P15104	4.23967	2.82742e-06	5.65548e-05
G5E9U9	4.20523	3.3226e-06	6.30135e-05
Q9H0J9	4.20523	3.3226e-06	6.30135e-05
F2Z2K0	4.19638	4.84993e-06	8.12981e-05
A0A499FIV7	4.19421	5.09146e-06	8.49619e-05
B7ZC38	4.19411	5.14202e-06	8.54081e-05
B7ZC39	4.19411	5.14202e-06	8.54081e-05
Q9NR46	4.19411	5.14202e-06	8.54081e-05
Q9NR46-2	4.19411	5.14202e-06	8.54081e-05
P19440-2	4.18383	6.20122e-06	9.6642e-05
Q01415	4.17842	9.74054e-06	0.000137565
O14744	4.17221	3.47641e-06	6.49679e-05
O14744-5	4.17221	3.47641e-06	6.49679e-05
P46109	4.15988	8.91472e-06	0.00012751
A0A087WW23	4.15793	2.54201e-05	0.000309496
P20292	4.15793	2.54201e-05	0.000309496
J3KN60	4.15626	2.18542e-05	0.000270304
A0A087WYM3	4.15392	3.78864e-06	6.8612e-05
Q8IXJ6	4.15392	3.78864e-06	6.8612e-05
Q8IXJ6-2	4.15392	3.78864e-06	6.8612e-05
Q8IXJ6-3	4.15392	3.78864e-06	6.8612e-05
Q8IXJ6-5	4.15392	3.78864e-06	6.8612e-05
K7EPU3	4.14924	2.08673e-05	0.000262261
K7EQK1	4.14924	2.08673e-05	0.000262261
J3QLB7	4.14064	2.40723e-05	0.000294487
H3BV79	4.13549	2.6041e-05	0.000316841
A0A3B3IS13	4.13463	6.95378e-06	0.000105347
A0A3B3ISK3	4.13463	6.95378e-06	0.000105347
A0A3B3IU76	4.13463	6.95378e-06	0.000105347
K7EJ42	4.13317	3.28277e-06	6.25227e-05
K7EPD0	4.13317	3.28277e-06	6.25227e-05
K7EQI9	4.13317	3.28277e-06	6.25227e-05
A0A494BZT7	4.1325	1.55296e-05	0.00020108
O14656	4.1325	1.55296e-05	0.00020108
A8MVS5	4.126	5.88079e-06	9.42715e-05
M0R0X1	4.12212	3.65504e-05	0.000429546
A0A0D9SFJ1	4.12115	4.17604e-06	7.18954e-05
Q9Y2Z9-2	4.12115	4.17604e-06	7.18954e-05
H0YE25	4.1191	5.47857e-06	9.01625e-05
H0YF25	4.1191	5.47857e-06	9.01625e-05
Q8NB37-2	4.1191	5.47857e-06	9.01625e-05
A0A087WZ38	4.11857	3.34858e-06	6.3372e-05
H0Y9X3	4.11857	3.34858e-06	6.3372e-05
A0A0B4J2B4	4.11841	1.29666e-05	0.000171748
K7ELC2	4.11841	1.29666e-05	0.000171748
K7EM56	4.11841	1.29666e-05	0.000171748
K7EQJ5	4.11841	1.29666e-05	0.000171748
P62841	4.11841	1.29666e-05	0.000171748
S4R417	4.11841	1.29666e-05	0.000171748
K7ELJ7	4.1166	4.77941e-06	8.04344e-05
H7C3T4	4.11038	1.36657e-05	0.000178902
M0R0R9	4.10998	4.23271e-05	0.000490994
P35269	4.10998	4.23271e-05	0.000490994
X6R5W5	4.10217	2.98078e-06	5.85122e-05
Q7Z7N9	4.09199	3.07093e-05	0.000366671
P16219	4.08698	2.87399e-05	0.000344994
A0A3B3ITS3	4.08367	2.14078e-05	0.000266252
F5GY40	4.07084	5.4105e-06	8.93705e-05
Q8NB37	4.06239	6.39455e-06	9.929e-05
Q13162	4.05751	1.86111e-05	0.00023745
Q5JVC1	4.05669	3.19685e-05	0.000378677
Q5JVC2	4.05669	3.19685e-05	0.000378677
Q8N0X4	4.05669	3.19685e-05	0.000378677
Q8N0X4-2	4.05669	3.19685e-05	0.000378677
I3L500	4.05362	3.13797e-06	6.06434e-05
I3L0V3	4.0441	3.21589e-06	6.15761e-05
I3L131	4.0441	3.21589e-06	6.15761e-05
I3L143	4.0441	3.21589e-06	6.15761e-05
I3L163	4.0441	3.21589e-06	6.15761e-05
I3L3H4	4.0441	3.21589e-06	6.15761e-05
I3L439	4.0441	3.21589e-06	6.15761e-05
I3L4D2	4.0441	3.21589e-06	6.15761e-05
G3V4Z6	4.04158	7.5327e-05	0.000843532
H0YJ95	4.04158	7.5327e-05	0.000843532
Q9UM01	4.04158	7.5327e-05	0.000843532
G5E9Y3	4.03228	2.35637e-05	0.000288857
Q05CH1	4.03228	2.35637e-05	0.000288857
Q8WWN8	4.03228	2.35637e-05	0.000288857
Q8WWN8-2	4.03228	2.35637e-05	0.000288857															2
J3KPS0	4.02537	9.19042e-05	0.00101611
Q9NXW2	4.02537	9.19042e-05	0.00101611
Q9NXW2-2	4.02537	9.19042e-05	0.00101611
Q96S59	4.02074	6.19082e-06	9.65638e-05
Q96S59-2	4.02074	6.19082e-06	9.65638e-05
Q96S59-3	4.02074	6.19082e-06	9.65638e-05
Q96T76-9	4.02002	3.99246e-06	7.02878e-05
G3V295	4.01907	3.39194e-06	6.40573e-05
G3V5Z7	4.01099	3.4317e-06	6.44685e-05
P60900	4.01099	3.4317e-06	6.44685e-05
C9JWQ9	4.01047	2.50899e-05	0.000306101
F8WAR1	4.01047	2.50899e-05	0.000306101
E9PCM6	4.00883	4.12931e-06	7.17437e-05
E7ET76	4.00626	7.02145e-06	0.000106193
I3L1X2	4.00497	4.28749e-06	7.3251e-05
A0A0D9SGJ6	4.00451	8.37527e-06	0.000120952
C9J1Z6	4.00451	8.37527e-06	0.000120952
C9JFZ1	4.00451	8.37527e-06	0.000120952
C9JW66	4.00451	8.37527e-06	0.000120952
J3KPK1	4.00451	8.37527e-06	0.000120952
J3KQV8	4.00451	8.37527e-06	0.000120952
O43426	4.00451	8.37527e-06	0.000120952
O43426-2	4.00451	8.37527e-06	0.000120952
O43426-4	4.00451	8.37527e-06	0.000120952
O43426-5	4.00451	8.37527e-06	0.000120952
Q9H7D0-2	4.00194	1.30234e-05	0.000171748
H3BPE3	4.00066	1.15566e-05	0.000155844
H3BTY8	4.00066	1.15566e-05	0.000155844
A0A1B0GTR1	3.99765	4.60816e-06	7.82077e-05
Q9UNZ2	3.99131	6.10914e-06	9.65638e-05
Q9UNZ2-5	3.99131	6.10914e-06	9.65638e-05
H0YDT8	3.97633	2.91896e-05	0.000349923
Q9NPA0	3.97633	2.91896e-05	0.000349923
A0A2R8Y7Q6	3.97004	0.000126432	0.00137746
Q9UDT6	3.94937	1.07614e-05	0.000149046
Q9UDT6-2	3.94937	1.07614e-05	0.000149046
F5H225	3.92432	9.01088e-05	0.000998719
Q5NDL2	3.92432	9.01088e-05	0.000998719
Q5NDL2-2	3.92432	9.01088e-05	0.000998719
Q5NDL2-3	3.92432	9.01088e-05	0.000998719
A0A0D9SG66	3.92403	4.53722e-05	0.000524281
A0A087WW26	3.91518	0.000356599	0.00375718
J3KQ40	3.9146	0.000189431	0.00203292
O95759	3.9146	0.000189431	0.00203292
O95759-2	3.9146	0.000189431	0.00203292
P08240	3.91129	1.59994e-05	0.000206734
P08240-2	3.91129	1.59994e-05	0.000206734
P49137	3.90988	6.46406e-06	0.000100042
P49137-2	3.90988	6.46406e-06	0.000100042
E7EXA3	3.90117	7.44685e-06	0.000110416
Q6X734	3.90117	7.44685e-06	0.000110416
Q9GZT8-3	3.90117	7.44685e-06	0.000110416
K7EIH8	3.89733	6.43368e-06	9.97443e-05
I3L380	3.88864	8.18325e-05	0.000912066
A0A2R8Y7Y4	3.8866	6.26328e-06	9.73552e-05
Q8N8A2	3.8866	6.26328e-06	9.73552e-05
Q8N8A2-2	3.8866	6.26328e-06	9.73552e-05
C9JJ19	3.88012	4.42692e-06	7.54893e-05
P82930	3.88012	4.42692e-06	7.54893e-05
H0Y8L3	3.86251	1.13844e-05	0.000154178
H0Y9D7	3.86251	1.13844e-05	0.000154178
H0YAB8	3.86251	1.13844e-05	0.000154178
S4R3C6	3.86251	1.13844e-05	0.000154178
O60825	3.86155	7.48831e-06	0.000110822
O60825-2	3.86155	7.48831e-06	0.000110822
Q8N573-2	3.85945	7.32979e-06	0.000109288
E9PP44	3.85917	2.72422e-05	0.000329666
D6RD67	3.85319	0.000273858	0.00290936
A6NLC6	3.85249	0.00127552	0.0129225
Q13546	3.84017	9.40979e-06	0.000133525
Q13546-2	3.84017	9.40979e-06	0.000133525
A0A1B0GTU8	3.83614	0.000619974	0.0063784
A0A1B0GU12	3.83614	0.000619974	0.0063784
A0A1B0GUT7	3.83614	0.000619974	0.0063784
A0A1B0GUV3	3.83614	0.000619974	0.0063784
A0A1B0GVB9	3.83614	0.000619974	0.0063784
A0A1B0GVC7	3.83614	0.000619974	0.0063784
A0A1B0GVI9	3.83614	0.000619974	0.0063784
A0A1B0GVW0	3.83614	0.000619974	0.0063784
A0A1B0GWD6	3.83614	0.000619974	0.0063784
A0A1C7CYW4	3.83614	0.000619974	0.0063784
B7Z1I9	3.83614	0.000619974	0.0063784
B7Z413	3.83614	0.000619974	0.0063784
O75787	3.83614	0.000619974	0.0063784
O75787-2	3.83614	0.000619974	0.0063784
H0YAB2	3.83563	4.75831e-06	8.02998e-05
Q9Y4D7	3.83563	4.75831e-06	8.02998e-05
Q9Y4D7-2	3.83563	4.75831e-06	8.02998e-05
A0A087WV97	3.81757	7.26957e-06	0.00010903
Q8WU79	3.81757	7.26957e-06	0.00010903
Q8WU79-2	3.81757	7.26957e-06	0.00010903
Q8WU79-3	3.81757	7.26957e-06	0.00010903
X6RCC3	3.81757	7.26957e-06	0.00010903
F8W1Z8	3.8137	7.06962e-06	0.00010681
A6NG45	3.81297	8.57085e-05	0.00095408
H0YB56	3.80616	7.98536e-05	0.000892229
Q7Z3C6	3.80209	3.49401e-05	0.00041116
Q7Z3C6-2	3.80209	3.49401e-05	0.00041116
A0A384DVU0	3.80078	1.10299e-05	0.000152177
Q8IY17	3.80078	1.10299e-05	0.000152177
Q8IY17-3	3.80078	1.10299e-05	0.000152177
F5GX20	3.79451	0.000225084	0.00240403
H0YLM9	3.79019	7.54808e-06	0.000111614
O43852-10	3.78399	1.99931e-05	0.000252691
O43852-11	3.78399	1.99931e-05	0.000252691
O43852-13	3.78399	1.99931e-05	0.000252691
O43852-14	3.78399	1.99931e-05	0.000252691
O43852-6	3.78399	1.99931e-05	0.000252691
Q15208	3.78014	6.97692e-06	0.000105608
H3BNI4	3.77855	0.0012884	0.0130456
O95466	3.76801	4.82902e-06	8.10353e-05
O95466-2	3.76801	4.82902e-06	8.10353e-05
O95466-3	3.76801	4.82902e-06	8.10353e-05
Q6P2E9	3.76515	1.16455e-05	0.000156807
Q6P2E9-2	3.76515	1.16455e-05	0.000156807
Q16762	3.73625	0.000199563	0.0021391
H0YF34	3.73514	1.30221e-05	0.000171748
A0A087WT42	3.73022	1.13986e-05	0.000154178
Q5VVW5	3.73022	1.13986e-05	0.000154178
Q9NY64	3.73022	1.13986e-05	0.000154178
A0A0A0MR62	3.7286	4.77975e-06	8.04344e-05
K7EK60	3.7286	4.77975e-06	8.04344e-05
H0YGC7	3.72626	0.000336523	0.00354983
A0A3B3IS01	3.72462	2.69319e-05	0.000326131
A0A3B3IT01	3.72462	2.69319e-05	0.000326131
P42338	3.72278	5.96817e-06	9.55013e-05
Q01459	3.71686	1.08529e-05	0.000150198
A0A499FJK2	3.69875	5.76295e-06	9.29646e-05
M0R2S0	3.69875	5.76295e-06	9.29646e-05
P01137	3.69875	5.76295e-06	9.29646e-05
C9IZY8	3.69825	6.59532e-06	0.00010181
A0A0A0MT65	3.67907	8.6261e-06	0.000123777
A0A087WXJ0	3.67382	0.000296253	0.00313612
C9J0X3	3.67382	0.000296253	0.00313612
C9J760	3.67382	0.000296253	0.00313612
C9JSR2	3.67382	0.000296253	0.00313612
C9K0F0	3.67382	0.000296253	0.00313612
Q96JY6-2	3.67382	0.000296253	0.00313612
O95352-3	3.66759	1.0225e-05	0.000142831
Q96GX9-3	3.66467	3.72424e-05	0.000436818
S4R3D6	3.66467	3.72424e-05	0.000436818
D6RAW3	3.65868	2.51607e-05	0.000306755
Q8N766	3.65655	1.84229e-05	0.000235335
Q8N766-2	3.65655	1.84229e-05	0.000235335
Q8N766-3	3.65655	1.84229e-05	0.000235335
Q8N766-4	3.65655	1.84229e-05	0.000235335
Q86UE4	3.64922	9.24752e-05	0.00102179
C9J3F5	3.64335	0.000101059	0.00110776
C9JJ39	3.64335	0.000101059	0.00110776
C9JKL2	3.64335	0.000101059	0.00110776
C9JPX5	3.64335	0.000101059	0.00110776
O95772	3.64335	0.000101059	0.00110776
O95772-2	3.64335	0.000101059	0.00110776
E3W990	3.63948	6.16057e-05	0.000698354
E5RHD7	3.63658	1.09179e-05	0.000150981
Q6NYC8-4	3.62368	8.33018e-06	0.000120952
Q12893	3.6235	6.13158e-06	9.65638e-05
Q12846-2	3.60639	5.95275e-05	0.000676079
Q5SRD0	3.60574	4.18204e-05	0.000485745
A0A0G2JRX6	3.59437	1.33481e-05	0.000175384
C9JM78	3.59437	1.33481e-05	0.000175384
C9JQ90	3.59437	1.33481e-05	0.000175384
H3BT44	3.58699	0.00019433	0.00208425
Q7Z7E8	3.57524	9.13746e-05	0.00101212
J3KTQ7	3.56477	6.09429e-05	0.000691278
A0A3B3ISK7	3.55425	3.29086e-05	0.000389042
Q6PI48	3.55425	3.29086e-05	0.000389042
E5RJU9	3.54747	0.000104692	0.00114687
E9PHY5	3.54398	9.04353e-06	0.000128736
E9PK52	3.54398	9.04353e-06	0.000128736
O43491	3.54398	9.04353e-06	0.000128736
O43491-4	3.54398	9.04353e-06	0.000128736
Q9BSH4	3.52161	9.6055e-05	0.00106004
I3L113	3.52142	5.87071e-05	0.000667183
I3L125	3.52142	5.87071e-05	0.000667183
I3L1C8	3.52142	5.87071e-05	0.000667183
I3L2J6	3.52142	5.87071e-05	0.000667183
I3L2M4	3.52142	5.87071e-05	0.000667183
I3L526	3.52142	5.87071e-05	0.000667183
Q96P47	3.51273	9.97051e-06	0.000139712
Q96P47-2	3.51273	9.97051e-06	0.000139712
Q96P47-4	3.51273	9.97051e-06	0.000139712
A5A3E0	3.49384	4.53071e-05	0.000523866
E7ESS6	3.49133	2.94405e-05	0.000352225
O14815	3.49133	2.94405e-05	0.000352225
O14815-2	3.49133	2.94405e-05	0.000352225
E9PM95	3.48426	2.30023e-05	0.00028402
Q9P2X0	3.4749	0.000688362	0.00705365
Q9P2X0-2	3.4749	0.000688362	0.00705365
C9JES8	3.46682	1.04185e-05	0.000144745
C9JHS7	3.46682	1.04185e-05	0.000144745
C9JHZ8	3.46682	1.04185e-05	0.000144745
C9JK79	3.46682	1.04185e-05	0.000144745
C9JT62	3.46682	1.04185e-05	0.000144745
C9JZI8	3.46682	1.04185e-05	0.000144745
C9J8Q3	3.46092	9.22668e-06	0.000131134
J3KS73	3.46081	0.00887746	0.0837819
O00142-3	3.46081	0.00887746	0.0837819
O00142-5	3.46081	0.00887746	0.0837819
M0R1I1	3.4588	8.35803e-05	0.000930967
E5RHL2	3.45328	2.65408e-05	0.0003219
E5RK84	3.45328	2.65408e-05	0.0003219
I3L3F5	3.45233	2.34791e-05	0.000288609
I3L3Y6	3.45233	2.34791e-05	0.000288609
I3L501	3.45233	2.34791e-05	0.000288609
A0A140TA12	3.45048	7.65923e-05	0.000856324
Q7Z2Z2	3.44884	1.27784e-05	0.000171161
H7C5U2	3.44815	6.20182e-05	0.000702586
E9PDJ4	3.42899	7.10407e-06	0.000107171
P56589	3.42351	0.000156136	0.00169182
P03891	3.42187	0.000180852	0.00195609
C9JK45	3.41018	7.23222e-05	0.000812639
H7C1I0	3.41018	7.23222e-05	0.000812639
Q96K37	3.41018	7.23222e-05	0.000812639
Q96K37-2	3.41018	7.23222e-05	0.000812639
Q8WUD1-2	3.37768	2.60881e-05	0.000317198
I3L0S1	3.35329	8.10128e-05	0.000903492
O60256-2	3.35329	8.10128e-05	0.000903492
O60256-4	3.35329	8.10128e-05	0.000903492
Q5TC02	3.35276	0.000229143	0.00244592
Q8IWB7	3.35058	1.66502e-05	0.000214834
A0A0A0MSW0	3.3323	9.80037e-06	0.000138301
E5RHJ4	3.32465	5.18894e-05	0.000597661
A0A0G2JR96	3.31371	0.00423696	0.0415399
F5H2G6	3.31047	0.000655924	0.00673666
O95487	3.30891	3.78777e-05	0.0004434
O95487-2	3.30891	3.78777e-05	0.0004434
O95487-3	3.30891	3.78777e-05	0.0004434
I3L0M4	3.29762	1.47754e-05	0.0001919
I3L327	3.29762	1.47754e-05	0.0001919
I3L3C5	3.29762	1.47754e-05	0.0001919
I3L3J7	3.29762	1.47754e-05	0.0001919
Q9NXA8	3.29333	1.30128e-05	0.000171748
Q9NXA8-2	3.29333	1.30128e-05	0.000171748
Q9NXA8-3	3.29333	1.30128e-05	0.000171748
Q9NXA8-4	3.29333	1.30128e-05	0.000171748
B4DHR0	3.29078	0.000119242	0.0013015
Q9H5N1	3.29078	0.000119242	0.0013015
D6RGF8	3.28019	0.00251961	0.025054
C9JV37	3.2589	0.000900541	0.0091806
C9J9B9	3.25032	9.92762e-05	0.00109222
C9JNQ1	3.25032	9.92762e-05	0.00109222
B7WPL9	3.23814	5.83669e-05	0.000665851
F8W9A8	3.23814	5.83669e-05	0.000665851
Q6PFW1	3.23814	5.83669e-05	0.000665851
Q6PFW1-2	3.23814	5.83669e-05	0.000665851
Q6PFW1-3	3.23814	5.83669e-05	0.000665851
Q6PFW1-4	3.23814	5.83669e-05	0.000665851
Q6PFW1-5	3.23814	5.83669e-05	0.000665851
Q6PFW1-6	3.23814	5.83669e-05	0.000665851
Q6PFW1-7	3.23814	5.83669e-05	0.000665851
Q6PKG0	3.23079	2.65466e-05	0.0003219
Q6PKG0-3	3.23079	2.65466e-05	0.0003219
R4GNE8	3.22073	1.40194e-05	0.000183264
D6REQ8	3.21105	1.2884e-05	0.000171748
E7EQB2	3.20412	0.00121385	0.0123186
E7ER44	3.20412	0.00121385	0.0123186
P02788	3.20412	0.00121385	0.0123186
P02788-2	3.20412	0.00121385	0.0123186
C9IZN7	3.19857	0.000413036	0.00433144
C9J7P5	3.19857	0.000413036	0.00433144
B5MD46	3.18135	1.29611e-05	0.000171748
F8WCD1	3.18135	1.29611e-05	0.000171748
H0Y2U5	3.18135	1.29611e-05	0.000171748
H0Y5R9	3.18135	1.29611e-05	0.000171748
H7C1Q1	3.18135	1.29611e-05	0.000171748
H7C471	3.18135	1.29611e-05	0.000171748
Q9BXI6	3.18135	1.29611e-05	0.000171748
Q9BXI6-2	3.18135	1.29611e-05	0.000171748
Q9Y6Y9	3.14293	0.000132759	0.00144463
Q9Y6Y9-2	3.14293	0.000132759	0.00144463
C9JGJ9	3.14235	0.000358543	0.00377544
A0A0J9YYC8	3.13113	0.000182915	0.00196795
A6XMV8	3.13113	0.000182915	0.00196795
A6XMV9	3.13113	0.000182915	0.00196795
H0Y8D1	3.13113	0.000182915	0.00196795
P07478	3.13113	0.000182915	0.00196795
Q8NHM4	3.13113	0.000182915	0.00196795
H0YDZ9	3.10705	0.000624946	0.00642218
O95340	3.1045	9.00892e-05	0.000998719
O95340-2	3.1045	9.00892e-05	0.000998719
C9J1K7	3.10242	6.45156e-05	0.000727201
C9J2R5	3.10242	6.45156e-05	0.000727201
C9J3U9	3.10242	6.45156e-05	0.000727201
C9JE51	3.10242	6.45156e-05	0.000727201
C9JIY7	3.10242	6.45156e-05	0.000727201
C9JT42	3.10242	6.45156e-05	0.000727201
E9PKY7	3.10103	4.33433e-05	0.000501485
Q9BX68	3.10039	0.000247169	0.00263676
I3L4C2	3.09076	2.17809e-05	0.000269584
Q9UQB8	3.09076	2.17809e-05	0.000269584
Q9UQB8-2	3.09076	2.17809e-05	0.000269584
Q9UQB8-3	3.09076	2.17809e-05	0.000269584
Q9UQB8-4	3.09076	2.17809e-05	0.000269584
Q9UQB8-5	3.09076	2.17809e-05	0.000269584
Q9UQB8-6	3.09076	2.17809e-05	0.000269584
A0A0B4J2B5	3.08276	9.70223e-05	0.00106874
A0A4W8ZXM2	3.08276	9.70223e-05	0.00106874
S4R460	3.08276	9.70223e-05	0.00106874
H3BPQ9	3.04264	0.000482211	0.00502452
Q9H2V7-5	3.04264	0.000482211	0.00502452
P02748	3.03667	0.000172664	0.00186978
Q5JUV6	3.02847	8.85358e-05	0.000984941
B0S8I6	3.00482	2.03629e-05	0.000256461
Q14320	3.00482	2.03629e-05	0.000256461
A0A087X283	2.99007	2.12221e-05	0.000264127
B7Z306	2.99007	2.12221e-05	0.000264127
C9J180	2.99007	2.12221e-05	0.000264127
C9J2P0	2.99007	2.12221e-05	0.000264127
H7C061	2.99007	2.12221e-05	0.000264127
P51965	2.99007	2.12221e-05	0.000264127
P51965-2	2.99007	2.12221e-05	0.000264127
P51965-3	2.99007	2.12221e-05	0.000264127
Q96LR5	2.99007	2.12221e-05	0.000264127
F8W1Q9	2.97957	3.92609e-05	0.000457797
A0A0G2JPT2	2.95845	0.000315009	0.00332681
Q5TC01	2.92214	0.000388331	0.00408672
H3BSF1	2.90338	0.000417259	0.00437061
P04731	2.90338	0.000417259	0.00437061
P51178	2.85938	5.49058e-05	0.000629976
P51178-2	2.85938	5.49058e-05	0.000629976
O43819	2.80627	4.14731e-05	0.000482024
H7C0N5	2.79611	0.0135688	0.12561
H7C0S6	2.79611	0.0135688	0.12561
H7C3P3	2.79611	0.0135688	0.12561
A0A3B3ITY3	2.7846	0.00013639	0.00148234
Q99836-4	2.7846	0.00013639	0.00148234
A0A1B0GU36	2.75925	0.00026824	0.00285305
A0A1B0GUT4	2.75925	0.00026824	0.00285305
A0A1B0GVG0	2.75925	0.00026824	0.00285305
A0A1B0GVZ3	2.75925	0.00026824	0.00285305
E7EP81	2.74006	3.2515e-05	0.000384897
R4GMQ5	2.73122	9.53955e-05	0.00105341
Q5TEJ0	2.72283	7.33783e-05	0.000823989
P30044	2.71119	0.0124174	0.115248
P30044-2	2.71119	0.0124174	0.115248
H3BTB3	2.68747	0.000402838	0.00422945
I3L0H8	2.68747	0.000402838	0.00422945
Q9NUU7	2.68747	0.000402838	0.00422945
A0A494C060	2.67984	0.000142904	0.00155219
P80294	2.663	0.000393667	0.00414043
H3BU80	2.6602	0.00192919	0.0194242
P04733	2.6602	0.00192919	0.0194242
P07438	2.6602	0.00192919	0.0194242
Q93083	2.6602	0.00192919	0.0194242
P55008-3	2.64435	0.000440837	0.00459877
P02790	2.63279	0.00464699	0.0454603
Q9BS19	2.63279	0.00464699	0.0454603
E9PIH6	2.6271	0.000260537	0.00277772
A0A087WWA3	2.6258	0.0118997	0.110673
O60333	2.6258	0.0118997	0.110673
O60333-2	2.6258	0.0118997	0.110673
O60333-4	2.6258	0.0118997	0.110673
Q4R9M9	2.6258	0.0118997	0.110673
F5H617	2.62321	0.00162844	0.0164794
A0A494C034	2.62011	0.000322663	0.00340564
J3QQT9	2.61789	0.00103804	0.0105703
Q6UVK1	2.57458	0.00113128	0.0115132
A0A2R8Y4E7	2.53913	0.00012493	0.00136192
A0A2R8Y6L2	2.53913	0.00012493	0.00136192
K7EL68	2.47952	0.0170724	0.155069
E9PPJ0	2.4616	0.0237828	0.209452
Q13435	2.4616	0.0237828	0.209452
A0A0A0MSI9	2.46071	0.000220978	0.00236158
Q99836-2	2.46071	0.000220978	0.00236158
Q9HD20-3	2.42727	0.0274036	0.235779
C9J1K5	2.42408	0.0233419	0.206279
P49662	2.41835	0.023389	0.206492
P49662-2	2.41835	0.023389	0.206492
Q8N4Z0-1	2.3601	0.021781	0.194498
A0A0U1RQH4	2.34694	0.000730665	0.00747858
E9PER6	2.32399	0.0242981	0.213153
O15530	2.32399	0.0242981	0.213153
O15530-3	2.32399	0.0242981	0.213153
O15530-5	2.32399	0.0242981	0.213153
Q6A1A2	2.32399	0.0242981	0.213153
Q5JXC5	2.31714	0.0105048	0.0984147
Q9NRZ5-2	2.30515	0.0134542	0.124747
Q96EC8	2.28543	0.0186426	0.168829
A0A087X1G1	2.2808	0.0277825	0.238124
C9IZN5	2.2808	0.0277825	0.238124
F8WAS3	2.2808	0.0277825	0.238124
H7BYD0	2.2808	0.0277825	0.238124
Q16718	2.2808	0.0277825	0.238124
Q16718-2	2.2808	0.0277825	0.238124
H0YAC7	2.27392	0.0296333	0.251105
A0A0G2JM99	2.23523	0.00400692	0.0394355
A0A0G2JMY9	2.23523	0.00400692	0.0394355
A0A0G2JP96	2.23523	0.00400692	0.0394355
O75019	2.23523	0.00400692	0.0394355
O75019-2	2.23523	0.00400692	0.0394355
Q8N6C8	2.23523	0.00400692	0.0394355
Q8N6C8-3	2.23523	0.00400692	0.0394355
H0YLY7	2.21717	0.0336423	0.278116
D6REZ0	2.20666	0.0345962	0.285598
Q96T76	2.18506	0.029868	0.25197
Q96T76-8	2.18506	0.029868	0.25197
I3L141	2.17521	0.0449386	0.356052
O43149-2	2.17521	0.0449386	0.356052
Q3ZAQ7	2.15637	0.0221134	0.197369
O00241	2.14355	0.0161507	0.147906
B2R5W2	2.13378	0.0265113	0.228651
B4DY08	2.13378	0.0265113	0.228651
G3V2Q1	2.13378	0.0265113	0.228651
G3V4C1	2.13378	0.0265113	0.228651
G3V4W0	2.13378	0.0265113	0.228651
G3V555	2.13378	0.0265113	0.228651
G3V575	2.13378	0.0265113	0.228651
G3V576	2.13378	0.0265113	0.228651
P07910	2.13378	0.0265113	0.228651
P07910-2	2.13378	0.0265113	0.228651
P07910-4	2.13378	0.0265113	0.228651
K7EL20	2.13338	0.0146441	0.134729
K7ER90	2.13338	0.0146441	0.134729
G3V5V3	2.12651	0.0450613	0.356394
O60524	2.12651	0.0450613	0.356394
O60524-3	2.12651	0.0450613	0.356394
O60524-4	2.12651	0.0450613	0.356394
H0YLW8	2.12621	0.0396662	0.319361
E5RJY0	2.12537	0.0336433	0.278116
F6TDL0	2.12537	0.0336433	0.278116
H0YBC2	2.12537	0.0336433	0.278116
P27986-2	2.12537	0.0336433	0.278116
P27986-3	2.12537	0.0336433	0.278116
P27986-5	2.12537	0.0336433	0.278116
Q5T4P3	2.12537	0.0336433	0.278116
Q92569	2.12537	0.0336433	0.278116
Q92569-2	2.12537	0.0336433	0.278116
Q92569-3	2.12537	0.0336433	0.278116
B4E1Z9	2.10997	0.039711	0.319435
H0YLI2	2.10997	0.039711	0.319435
A0A087X0W9	2.10885	0.00599947	0.0578078
Q58F21	2.10885	0.00599947	0.0578078
Q58F21-2	2.10885	0.00599947	0.0578078
Q58F21-3	2.10885	0.00599947	0.0578078
Q58F21-4	2.10885	0.00599947	0.0578078
Q58F21-5	2.10885	0.00599947	0.0578078
Q8N6M0	2.10885	0.00599947	0.0578078
Q8N6M0-2	2.10885	0.00599947	0.0578078
Q96JH7	2.0965	0.0395453	0.318982
C9JR82	2.09612	0.0345357	0.28523
H0YKY3	2.09561	0.0412448	0.330882
J3KSJ5	2.08596	0.0192029	0.173029
J3KTF4	2.08596	0.0192029	0.173029
J3QKS6	2.08596	0.0192029	0.173029
J3QRG5	2.08596	0.0192029	0.173029
Q07065	2.07994	0.0429289	0.342704
E9PL44	2.07852	0.0327998	0.272905
P28289	2.0758	0.000534918	0.00555757
P28289-2	2.0758	0.000534918	0.00555757
C9IYT0	2.06796	0.0094524	0.0886478
H7C0M1	2.06796	0.0094524	0.0886478
O60832	2.06796	0.0094524	0.0886478
O60832-2	2.06796	0.0094524	0.0886478
F8WEG2	2.05136	0.000494688	0.00515154
C9JNK6	2.04039	0.027952	0.238792
O75431	2.04039	0.027952	0.238792
O75431-2	2.04039	0.027952	0.238792
D6RJC7	2.02806	0.0378175	0.307237
P84090	2.0245	0.0069757	0.0669981
A0A590UK30	2.01727	0.000709958	0.00727078
A0A5H1ZRQ4	-2.01987	0.0226526	0.201779
P0CG04	-2.01987	0.0226526	0.201779
P27694	-2.24418	0.000347214	0.00366046
Q9P0K7	-2.41533	0.000183047	0.00196795
Q9P0K7-2	-2.41533	0.000183047	0.00196795
Q9P0K7-3	-2.41533	0.000183047	0.00196795
Q9P0K7-4	-2.41533	0.000183047	0.00196795
E9PKR8	-2.77146	0.00421829	0.0413794
H3BQX5	-2.77146	0.00421829	0.0413794
P17661	-3.55197	0.00414176	0.0406732
E5RGZ4	-14.314	5.40307e-05	0.00062073
P13929	-14.314	5.40307e-05	0.00062073
P13929-2	-14.314	5.40307e-05	0.00062073
P13929-3	-14.314	5.40307e-05	0.00062073
