# Supplementary material for: Quantitative Proteomics Reveal That CB2R Agonist JWH-133 Downregulates NF-κB Activation, Oxidative Stress, and Lysosomal Exocytosis from HIV-Infected Macrophages
Source: Int J Mol Sci. 2024 Mar 13;25(6):3246. doi: 10.3390/ijms25063246 (PMC10970132; doi:10.3390/ijms25063246)
Supplement: Supplementary file 1 [file ijms-25-03246-s001.zip › Table S2-Protein Species HIV-Agonist vs. HIV.xlsx]

## Sheet: HIV+Agonist vs HIV
Accession	FC	P.Value	adj.P.Val-FDR
E5RGZ4	18.7081	4.86207e-07	2.8109e-05
P13929	18.7081	4.86207e-07	2.8109e-05
P13929-2	18.7081	4.86207e-07	2.8109e-05
P13929-3	18.7081	4.86207e-07	2.8109e-05
C9JY46	2.6722	0.0471291	0.436285
E9PKR8	2.33949	0.0371966	0.356681
H3BQX5	2.33949	0.0371966	0.356681
P17661	2.01461	0.0479145	0.442433
O95140	-2.01158	0.0437061	0.410535
Q5T0S3	-2.01212	0.0492444	0.451668
Q96T76	-2.01729	0.0461749	0.428337
Q96T76-8	-2.01729	0.0461749	0.428337
B4E1Z9	-2.04232	0.0484735	0.446195
H0YLI2	-2.04232	0.0484735	0.446195
J3KSJ5	-2.04895	0.0226543	0.22784
J3KTF4	-2.04895	0.0226543	0.22784
J3QKS6	-2.04895	0.0226543	0.22784
J3QRG5	-2.04895	0.0226543	0.22784
H0YLW8	-2.05597	0.0487084	0.447209
G3V5V3	-2.08149	0.0486396	0.446806
O60524	-2.08149	0.0486396	0.446806
O60524-3	-2.08149	0.0486396	0.446806
O60524-4	-2.08149	0.0486396	0.446806
B4E1C5	-2.08438	0.0497045	0.455378
Q8TBX8	-2.09127	0.0446542	0.417731
Q8TBX8-2	-2.09127	0.0446542	0.417731
Q8TBX8-3	-2.09127	0.0446542	0.417731
A0A087X1G1	-2.10275	0.0364357	0.349947
C9IZN5	-2.10275	0.0364357	0.349947
F8WAS3	-2.10275	0.0364357	0.349947
H7BYD0	-2.10275	0.0364357	0.349947
Q16718	-2.10275	0.0364357	0.349947
Q16718-2	-2.10275	0.0364357	0.349947
I3L2R9	-2.10672	0.000798356	0.00835267
I3L2T8	-2.10672	0.000798356	0.00835267
I3L533	-2.10672	0.000798356	0.00835267
J3QSD2	-2.10672	0.000798356	0.00835267
Q9NXR1	-2.10672	0.000798356	0.00835267
Q9NXR1-1	-2.10672	0.000798356	0.00835267
Q9NRZ5-2	-2.11231	0.022796	0.229136
D6REZ0	-2.11495	0.0386404	0.370328
C9J1K5	-2.11585	0.036262	0.34959
E7ES96	-2.127	0.023088	0.231552
P49768	-2.127	0.023088	0.231552
P49768-2	-2.127	0.023088	0.231552
P49768-7	-2.127	0.023088	0.231552
H0YAC7	-2.12989	0.0391148	0.374243
C9JR82	-2.13759	0.0290918	0.288216
A0A494C034	-2.18019	0.00494659	0.0507167
Q9HD20-3	-2.20019	0.0303273	0.299299
A0A494BZT5	-2.20209	0.0434483	0.408541
M0R0G9	-2.20241	0.043239	0.407384
P49662	-2.23091	0.033918	0.330909
P49662-2	-2.23091	0.033918	0.330909
H7C0N5	-2.24865	0.0360084	0.347518
H7C0S6	-2.24865	0.0360084	0.347518
H7C3P3	-2.24865	0.0360084	0.347518
Q5JXC5	-2.27118	0.0152754	0.15467
Q3ZAQ7	-2.29568	0.0162087	0.163934
E9PER6	-2.30757	0.0251071	0.249706
O15530	-2.30757	0.0251071	0.249706
O15530-3	-2.30757	0.0251071	0.249706
O15530-5	-2.30757	0.0251071	0.249706
Q6A1A2	-2.30757	0.0251071	0.249706
A0A0A0MSI9	-2.30805	0.00389217	0.0400203
Q99836-2	-2.30805	0.00389217	0.0400203
Q8N4Z0-1	-2.33049	0.0314756	0.308423
F8WEG2	-2.38838	0.00486031	0.0498606
H3BTB3	-2.39871	0.0321503	0.314347
I3L0H8	-2.39871	0.0321503	0.314347
Q9NUU7	-2.39871	0.0321503	0.314347
P80294	-2.42601	0.0223446	0.225231
H3BU80	-2.44264	0.0238354	0.238115
P04733	-2.44264	0.0238354	0.238115
P07438	-2.44264	0.0238354	0.238115
Q93083	-2.44264	0.0238354	0.238115
P30044	-2.51615	0.0177079	0.178594
P30044-2	-2.51615	0.0177079	0.178594
K7EL68	-2.54475	0.0134215	0.136219
A0A087WWA3	-2.54866	0.0134379	0.136219
O60333	-2.54866	0.0134379	0.136219
O60333-2	-2.54866	0.0134379	0.136219
O60333-4	-2.54866	0.0134379	0.136219
Q4R9M9	-2.54866	0.0134379	0.136219
A0A494C060	-2.59614	0.00157996	0.0163961
H3BSF1	-2.62851	0.0249107	0.24858
P04731	-2.62851	0.0249107	0.24858
A0A3B3ITY3	-2.63836	0.0119552	0.121601
Q99836-4	-2.63836	0.0119552	0.121601
O43819	-2.68865	3.82539e-05	0.000479721
Q6UVK1	-2.73712	0.00909469	0.0927689
E7EP81	-2.74963	0.000279886	0.00302722
A0A0B4J2B5	-2.81376	3.26044e-05	0.000416194
A0A4W8ZXM2	-2.81376	3.26044e-05	0.000416194
S4R460	-2.81376	3.26044e-05	0.000416194
A0A087WW26	-2.83978	0.00270846	0.0278811
B5MD46	-2.84208	7.84318e-05	0.00091514
F8WCD1	-2.84208	7.84318e-05	0.00091514
H0Y2U5	-2.84208	7.84318e-05	0.00091514
H0Y5R9	-2.84208	7.84318e-05	0.00091514
H7C1Q1	-2.84208	7.84318e-05	0.00091514
H7C471	-2.84208	7.84318e-05	0.00091514
Q9BXI6	-2.84208	7.84318e-05	0.00091514
Q9BXI6-2	-2.84208	7.84318e-05	0.00091514
A0A2R8Y4E7	-2.90277	0.000171853	0.00190356
A0A2R8Y6L2	-2.90277	0.000171853	0.00190356
A6NLC6	-2.90996	0.000697512	0.00736208
H3BPE3	-2.91168	0.0170566	0.172219
H3BTY8	-2.91168	0.0170566	0.172219
R4GMQ5	-2.92038	6.01889e-05	0.000719617
F5H617	-2.92492	0.000377861	0.0040214
C9JGJ9	-2.93969	2.71579e-05	0.000354496
H3BPQ9	-2.95043	3.36899e-05	0.00042822
Q9H2V7-5	-2.95043	3.36899e-05	0.00042822
P02748	-2.9657	7.33937e-05	0.000867081
P56589	-2.98405	4.37843e-05	0.000535998
I3L0S1	-2.9917	0.00113925	0.0118776
O60256-2	-2.9917	0.00113925	0.0118776
O60256-4	-2.9917	0.00113925	0.0118776
Q5TEJ0	-3.01465	6.82703e-05	0.000811366
P03891	-3.02155	0.000121239	0.00136829
O95340	-3.02205	0.000710863	0.00749417
O95340-2	-3.02205	0.000710863	0.00749417
A0A0U1RQH4	-3.03702	2.29619e-05	0.000306193
C9J1K7	-3.05198	0.000250176	0.00271079
C9J2R5	-3.05198	0.000250176	0.00271079
C9J3U9	-3.05198	0.000250176	0.00271079
C9JE51	-3.05198	0.000250176	0.00271079
C9JIY7	-3.05198	0.000250176	0.00271079
C9JT42	-3.05198	0.000250176	0.00271079
C9J9B9	-3.08815	8.16941e-05	0.000945204
C9JNQ1	-3.08815	8.16941e-05	0.000945204
B7WPL9	-3.11473	0.000179381	0.00197473
F8W9A8	-3.11473	0.000179381	0.00197473
Q6PFW1	-3.11473	0.000179381	0.00197473
Q6PFW1-2	-3.11473	0.000179381	0.00197473
Q6PFW1-3	-3.11473	0.000179381	0.00197473
Q6PFW1-4	-3.11473	0.000179381	0.00197473
Q6PFW1-5	-3.11473	0.000179381	0.00197473
Q6PFW1-6	-3.11473	0.000179381	0.00197473
Q6PFW1-7	-3.11473	0.000179381	0.00197473
P51178	-3.13084	5.04564e-05	0.000608532
P51178-2	-3.13084	5.04564e-05	0.000608532
J3KS73	-3.13779	0.00164306	0.0170213
O00142-3	-3.13779	0.00164306	0.0170213
O00142-5	-3.13779	0.00164306	0.0170213
A0A0G2JPT2	-3.14474	0.00017378	0.00192371
Q9BSH4	-3.15449	3.10802e-05	0.000398725
P62899	-3.16504	0.000348416	0.00371464
E9PIH6	-3.16698	2.41861e-05	0.000318489
Q7Z7E8	-3.17162	0.00183031	0.0189502
I3L4C2	-3.17483	0.00020399	0.00222786
Q9UQB8	-3.17483	0.00020399	0.00222786
Q9UQB8-2	-3.17483	0.00020399	0.00222786
Q9UQB8-3	-3.17483	0.00020399	0.00222786
Q9UQB8-4	-3.17483	0.00020399	0.00222786
Q9UQB8-5	-3.17483	0.00020399	0.00222786
Q9UQB8-6	-3.17483	0.00020399	0.00222786
A0A1B0GU36	-3.17733	0.000762466	0.00800522
A0A1B0GUT4	-3.17733	0.000762466	0.00800522
A0A1B0GVG0	-3.17733	0.000762466	0.00800522
A0A1B0GVZ3	-3.17733	0.000762466	0.00800522
F8W1Q9	-3.17815	0.00117867	0.0122815
B7Z4C8	-3.1783	0.000583106	0.00615817
B7Z4E3	-3.1783	0.000583106	0.00615817
B8ZZK4	-3.1783	0.000583106	0.00615817
C9JU56	-3.1783	0.000583106	0.00615817
H7C2W9	-3.1783	0.000583106	0.00615817
P62899-2	-3.1783	0.000583106	0.00615817
P62899-3	-3.1783	0.000583106	0.00615817
E5RHL2	-3.19329	0.000251752	0.00272458
E5RK84	-3.19329	0.000251752	0.00272458
E9PKY7	-3.19451	8.83893e-05	0.00101609
A0A087X283	-3.1991	4.15711e-05	0.00050995
B7Z306	-3.1991	4.15711e-05	0.00050995
C9J180	-3.1991	4.15711e-05	0.00050995
C9J2P0	-3.1991	4.15711e-05	0.00050995
H7C061	-3.1991	4.15711e-05	0.00050995
P51965	-3.1991	4.15711e-05	0.00050995
P51965-2	-3.1991	4.15711e-05	0.00050995
P51965-3	-3.1991	4.15711e-05	0.00050995
Q96LR5	-3.1991	4.15711e-05	0.00050995
C9JK45	-3.20184	2.39518e-05	0.000315868
H7C1I0	-3.20184	2.39518e-05	0.000315868
Q96K37	-3.20184	2.39518e-05	0.000315868
Q96K37-2	-3.20184	2.39518e-05	0.000315868
O14879	-3.20198	0.000218767	0.00238198
A0A2R8Y6A3	-3.20463	0.00465125	0.0477433
R4GNE8	-3.2079	1.82648e-05	0.000255935
Q9NXA8	-3.23271	1.5874e-05	0.000227959
Q9NXA8-2	-3.23271	1.5874e-05	0.000227959
Q9NXA8-3	-3.23271	1.5874e-05	0.000227959
Q9NXA8-4	-3.23271	1.5874e-05	0.000227959
B4DHR0	-3.27989	0.000351097	0.00373878
Q9H5N1	-3.27989	0.000351097	0.00373878
Q9P2X0	-3.28072	3.21729e-05	0.000411565
Q9P2X0-2	-3.28072	3.21729e-05	0.000411565
A0A0G2JRX6	-3.29195	1.56296e-05	0.000225534
C9JM78	-3.29195	1.56296e-05	0.000225534
C9JQ90	-3.29195	1.56296e-05	0.000225534
F5H2G6	-3.29545	0.000211543	0.00230473
D6REQ8	-3.30322	1.90287e-05	0.000263266
A0A140TA12	-3.31058	1.10935e-05	0.000176884
Q6PKG0	-3.34188	1.44017e-05	0.000212434
Q6PKG0-3	-3.34188	1.44017e-05	0.000212434
Q5JUV6	-3.35113	7.69129e-05	0.000905077
P02790	-3.35117	0.000759172	0.00798936
Q9BS19	-3.35117	0.000759172	0.00798936
H7C5U2	-3.35326	1.77739e-05	0.000249251
A0A0D9SFJ1	-3.35495	1.90376e-05	0.000263266
Q9Y2Z9-2	-3.35495	1.90376e-05	0.000263266
O95487	-3.36077	1.52976e-05	0.000222174
O95487-2	-3.36077	1.52976e-05	0.000222174
O95487-3	-3.36077	1.52976e-05	0.000222174
A0A0G2JR96	-3.37239	0.000234862	0.00255568
J3KTQ7	-3.37929	9.54538e-06	0.000156947
A0A3B3ISK7	-3.38514	1.49822e-05	0.000218835
Q6PI48	-3.38514	1.49822e-05	0.000218835
Q8WUD1-2	-3.39449	4.65433e-05	0.000563996
C9JJ19	-3.40172	0.00012438	0.00140197
P82930	-3.40172	0.00012438	0.00140197
B0S8I6	-3.40558	0.000136802	0.00153427
Q14320	-3.40558	0.000136802	0.00153427
A0A087WT42	-3.41969	1.77708e-05	0.000249251
Q5VVW5	-3.41969	1.77708e-05	0.000249251
Q9NY64	-3.41969	1.77708e-05	0.000249251
E5RHD7	-3.43386	2.87797e-05	0.000374031
A0A087WV97	-3.44831	2.91599e-05	0.000377604
Q8WU79	-3.44831	2.91599e-05	0.000377604
Q8WU79-2	-3.44831	2.91599e-05	0.000377604
Q8WU79-3	-3.44831	2.91599e-05	0.000377604
X6RCC3	-3.44831	2.91599e-05	0.000377604
Q7Z2Z2	-3.45319	1.06919e-05	0.000171243
H0YAB2	-3.45354	8.04494e-06	0.000138769
Q9Y4D7	-3.45354	8.04494e-06	0.000138769
Q9Y4D7-2	-3.45354	8.04494e-06	0.000138769
E5RJU9	-3.4551	5.72598e-05	0.000688732
Q96T76-9	-3.46567	1.49084e-05	0.000218598
A0A2R8Y4W2	-3.4679	6.30086e-05	0.000751324
A0A2R8YE63	-3.4679	6.30086e-05	0.000751324
Q12929	-3.4679	6.30086e-05	0.000751324
Q12929-2	-3.4679	6.30086e-05	0.000751324
I3L0M4	-3.46985	0.000203543	0.00222786
I3L327	-3.46985	0.000203543	0.00222786
I3L3C5	-3.46985	0.000203543	0.00222786
I3L3J7	-3.46985	0.000203543	0.00222786
H3BNI4	-3.47329	0.000454182	0.00481933
E9PDJ4	-3.47483	8.84441e-05	0.00101609
C9J3F5	-3.47621	3.76015e-05	0.000473572
C9JJ39	-3.47621	3.76015e-05	0.000473572
C9JKL2	-3.47621	3.76015e-05	0.000473572
C9JPX5	-3.47621	3.76015e-05	0.000473572
O95772	-3.47621	3.76015e-05	0.000473572
O95772-2	-3.47621	3.76015e-05	0.000473572
A0A0A0MSW0	-3.48528	7.64234e-06	0.000135476
H0YF34	-3.48633	2.45762e-05	0.000322958
Q96P47	-3.49792	8.62563e-05	0.000992862
Q96P47-2	-3.49792	8.62563e-05	0.000992862
Q96P47-4	-3.49792	8.62563e-05	0.000992862
P16219	-3.50386	1.05135e-05	0.00016899
A0A3B3IS01	-3.51578	1.27975e-05	0.000196872
A0A3B3IT01	-3.51578	1.27975e-05	0.000196872
C9JV37	-3.51963	1.12395e-05	0.000178735
H3BT44	-3.5239	1.97876e-05	0.000270713
Q5SRD0	-3.52421	0.000292054	0.00315503
Q6P2E9	-3.52479	6.448e-05	0.000767337
Q6P2E9-2	-3.52479	6.448e-05	0.000767337
A0A499FJK2	-3.53071	7.58519e-05	0.000893179
M0R2S0	-3.53071	7.58519e-05	0.000893179
P01137	-3.53071	7.58519e-05	0.000893179
Q96GX9-3	-3.53617	8.38419e-06	0.000142563
S4R3D6	-3.53617	8.38419e-06	0.000142563
Q5TC01	-3.54603	9.51793e-06	0.000156639
C9JWQ9	-3.54872	7.21545e-06	0.000130227
F8WAR1	-3.54872	7.21545e-06	0.000130227
Q6NYC8-4	-3.55853	2.28471e-05	0.000304889
Q86UE4	-3.55881	4.88235e-05	0.000589633
E9PHY5	-3.55945	1.51569e-05	0.000220668
E9PK52	-3.55945	1.51569e-05	0.000220668
O43491	-3.55945	1.51569e-05	0.000220668
O43491-4	-3.55945	1.51569e-05	0.000220668
J3KPS0	-3.5634	8.55085e-06	0.000144438
Q9NXW2	-3.5634	8.55085e-06	0.000144438
Q9NXW2-2	-3.5634	8.55085e-06	0.000144438
A5A3E0	-3.57066	0.000164783	0.0018275
C9J8Q3	-3.57073	8.90057e-06	0.000148802
I3L3F5	-3.57307	4.59682e-05	0.000557403
I3L3Y6	-3.57307	4.59682e-05	0.000557403
I3L501	-3.57307	4.59682e-05	0.000557403
A0A0G2JNQ3	-3.57843	0.000144757	0.0016144
A0A0G2JPF8	-3.57843	0.000144757	0.0016144
B2RXH8	-3.57843	0.000144757	0.0016144
B4DSU6	-3.57843	0.000144757	0.0016144
B7ZW38	-3.57843	0.000144757	0.0016144
G3V251	-3.57843	0.000144757	0.0016144
G3V3K6	-3.57843	0.000144757	0.0016144
G3V5X6	-3.57843	0.000144757	0.0016144
O60812	-3.57843	0.000144757	0.0016144
Q9Y6Y9	-3.57889	9.83196e-06	0.000160189
Q9Y6Y9-2	-3.57889	9.83196e-06	0.000160189
A0A3B3IS13	-3.58192	0.000211472	0.00230473
A0A3B3ISK3	-3.58192	0.000211472	0.00230473
A0A3B3IU76	-3.58192	0.000211472	0.00230473
O60825	-3.59127	6.82752e-06	0.000124352
O60825-2	-3.59127	6.82752e-06	0.000124352
C9IZN7	-3.59131	8.36838e-05	0.000965731
C9J7P5	-3.59131	8.36838e-05	0.000965731
E5RHJ4	-3.59716	3.06819e-05	0.000394076
H0Y8L3	-3.60775	9.23477e-06	0.000153246
H0Y9D7	-3.60775	9.23477e-06	0.000153246
H0YAB8	-3.60775	9.23477e-06	0.000153246
S4R3C6	-3.60775	9.23477e-06	0.000153246
G3V4Z6	-3.62222	2.3831e-05	0.000315202
H0YJ95	-3.62222	2.3831e-05	0.000315202
Q9UM01	-3.62222	2.3831e-05	0.000315202
G5E9U9	-3.62776	1.47774e-05	0.000217438
Q9H0J9	-3.62776	1.47774e-05	0.000217438
Q01459	-3.6336	4.80572e-05	0.00058077
Q12846-2	-3.63839	3.33456e-05	0.00042505
A0A2R8Y7Y4	-3.64136	1.72401e-05	0.000243084
Q8N8A2	-3.64136	1.72401e-05	0.000243084
Q8N8A2-2	-3.64136	1.72401e-05	0.000243084
Q15208	-3.64654	2.96082e-05	0.00038258
Q8N766	-3.65066	9.29326e-06	0.000153647
Q8N766-2	-3.65066	9.29326e-06	0.000153647
Q8N766-3	-3.65066	9.29326e-06	0.000153647
Q8N766-4	-3.65066	9.29326e-06	0.000153647
A0A1B0GTR1	-3.65098	3.5076e-05	0.000444891
P08240	-3.65659	1.56145e-05	0.000225534
P08240-2	-3.65659	1.56145e-05	0.000225534
F5GY40	-3.65687	7.65796e-06	0.000135485
H0YLM9	-3.65854	1.9194e-05	0.000265019
H0YGC7	-3.65989	4.55565e-05	0.000555784
Q7Z3C6	-3.6786	4.73037e-05	0.000572049
Q7Z3C6-2	-3.6786	4.73037e-05	0.000572049
K7EPU3	-3.67985	9.38114e-06	0.000154815
K7EQK1	-3.67985	9.38114e-06	0.000154815
A0A0A0MR62	-3.69473	2.83099e-05	0.00036846
K7EK60	-3.69473	2.83099e-05	0.00036846
A0A087WW23	-3.69603	1.20237e-05	0.00018886
P20292	-3.69603	1.20237e-05	0.00018886
Q8IWB7	-3.70984	7.20098e-06	0.000130227
D6RGF8	-3.71134	0.000333171	0.00355422
H0YB56	-3.7123	3.78433e-05	0.000476283
G5E9Y3	-3.71353	7.90521e-05	0.000919982
Q05CH1	-3.71353	7.90521e-05	0.000919982
Q8WWN8	-3.71353	7.90521e-05	0.000919982
Q8WWN8-2	-3.71353	7.90521e-05	0.000919982
E7EQB2	-3.71649	0.000154321	0.00171466
E7ER44	-3.71649	0.000154321	0.00171466
P02788	-3.71649	0.000154321	0.00171466
P02788-2	-3.71649	0.000154321	0.00171466
Q9BX68	-3.71735	2.54306e-05	0.000333651
E9PM95	-3.74764	2.30618e-05	0.000307297
F5GX20	-3.74805	0.000132572	0.00149057
F8W1Z8	-3.76366	8.07028e-06	0.000139073
H7C3T4	-3.76576	1.28304e-05	0.00019704
O95466	-3.76593	2.25584e-05	0.000302161
O95466-2	-3.76593	2.25584e-05	0.000302161
O95466-3	-3.76593	2.25584e-05	0.000302161
A0A0C4DGL4	-3.77562	2.08558e-05	0.000284025
Q01650	-3.77562	2.08558e-05	0.000284025
Q92536	-3.77562	2.08558e-05	0.000284025
Q9UDT6	-3.77815	1.40194e-05	0.00020848
Q9UDT6-2	-3.77815	1.40194e-05	0.00020848
A0A0D9SG66	-3.78694	7.82322e-06	0.000137124
I3L500	-3.78848	2.34219e-05	0.000311401
O95352-3	-3.79056	7.30758e-06	0.000131625
Q96S52	-3.79302	1.29226e-05	0.000198117
Q96S52-2	-3.79302	1.29226e-05	0.000198117
H0Y8X1	-3.79418	3.52428e-05	0.000446376
A0A2R8YDJ1	-3.80484	5.105e-05	0.000615278
A0A087WZ38	-3.80623	7.76505e-06	0.000137109
H0Y9X3	-3.80623	7.76505e-06	0.000137109
C9JES8	-3.81078	7.90565e-06	0.000137124
C9JHS7	-3.81078	7.90565e-06	0.000137124
C9JHZ8	-3.81078	7.90565e-06	0.000137124
C9JK79	-3.81078	7.90565e-06	0.000137124
C9JT62	-3.81078	7.90565e-06	0.000137124
C9JZI8	-3.81078	7.90565e-06	0.000137124
E7ESS6	-3.81368	0.000396044	0.00420741
O14815	-3.81368	0.000396044	0.00420741
O14815-2	-3.81368	0.000396044	0.00420741
D6RHZ7	-3.81388	5.5241e-06	0.00010521
Q12893	-3.82013	4.93435e-06	9.80038e-05
D6RH20	-3.82404	3.06958e-05	0.000394076
G5EA06	-3.82404	3.06958e-05	0.000394076
Q92552	-3.82404	3.06958e-05	0.000394076
Q92552-2	-3.82404	3.06958e-05	0.000394076
Q8N573-2	-3.83078	5.48587e-06	0.000104705
J3QLB7	-3.83456	8.22954e-05	0.000951547
I3L0V3	-3.84333	2.12237e-05	0.000287506
I3L131	-3.84333	2.12237e-05	0.000287506
I3L143	-3.84333	2.12237e-05	0.000287506
I3L163	-3.84333	2.12237e-05	0.000287506
I3L3H4	-3.84333	2.12237e-05	0.000287506
I3L439	-3.84333	2.12237e-05	0.000287506
I3L4D2	-3.84333	2.12237e-05	0.000287506
K7ELJ7	-3.8446	7.81576e-06	0.000137124
H0YGB8	-3.84931	1.90814e-05	0.000263668
F5H225	-3.85549	1.9707e-05	0.000269816
Q5NDL2	-3.85549	1.9707e-05	0.000269816
Q5NDL2-2	-3.85549	1.9707e-05	0.000269816
Q5NDL2-3	-3.85549	1.9707e-05	0.000269816
Q9UNZ2	-3.8565	1.40289e-05	0.00020848
Q9UNZ2-5	-3.8565	1.40289e-05	0.00020848
Q13162	-3.85945	1.03665e-05	0.000167488
H7C2S8	-3.86088	9.70803e-06	0.000158747
A0A494BZT7	-3.86149	6.7145e-06	0.000123155
O14656	-3.86149	6.7145e-06	0.000123155
E3W990	-3.87869	6.58763e-06	0.00012134
K7EIH8	-3.88811	2.32978e-05	0.000310165
Q16762	-3.88981	3.05769e-05	0.000393961
E9PP44	-3.89304	2.13606e-05	0.000289143
D6RAW3	-3.8996	0.000238364	0.00259221
H7C2Y1	-3.90086	1.88247e-05	0.000261329
Q14669	-3.90086	1.88247e-05	0.000261329
Q14669-2	-3.90086	1.88247e-05	0.000261329
Q14669-3	-3.90086	1.88247e-05	0.000261329
Q14669-4	-3.90086	1.88247e-05	0.000261329
Q02218-3	-3.90181	7.77263e-05	0.000914049
E9PCM6	-3.90271	2.05298e-05	0.000280653
A0A3B3ITS3	-3.90406	9.84154e-06	0.0001602
C9IZY8	-3.9159	7.65759e-06	0.000135485
F8W9F8	-3.916	1.36401e-05	0.000203884
Q5T0W7	-3.916	1.36401e-05	0.000203884
Q8TBY0	-3.916	1.36401e-05	0.000203884
Q8TBY0-2	-3.916	1.36401e-05	0.000203884
Q8TBY0-3	-3.916	1.36401e-05	0.000203884
Q9NQ94	-3.916	1.36401e-05	0.000203884
Q9NQ94-2	-3.916	1.36401e-05	0.000203884
Q9NQ94-3	-3.916	1.36401e-05	0.000203884
Q9NQ94-4	-3.916	1.36401e-05	0.000203884
Q9NQ94-5	-3.916	1.36401e-05	0.000203884
Q9NQ94-6	-3.916	1.36401e-05	0.000203884
E7EXA3	-3.92629	1.15039e-05	0.00018149
Q6X734	-3.92629	1.15039e-05	0.00018149
Q9GZT8-3	-3.92629	1.15039e-05	0.00018149
O43852-10	-3.93248	1.66474e-05	0.000235854
O43852-11	-3.93248	1.66474e-05	0.000235854
O43852-13	-3.93248	1.66474e-05	0.000235854
O43852-14	-3.93248	1.66474e-05	0.000235854
O43852-6	-3.93248	1.66474e-05	0.000235854
Q9H7D0-2	-3.93723	4.90129e-06	9.80038e-05
A0A0U1RQH7	-3.95276	4.56615e-05	0.000555784
A0A0U1RQW2	-3.95276	4.56615e-05	0.000555784
G3XAC6	-3.95276	4.56615e-05	0.000555784
H0Y4X3	-3.95276	4.56615e-05	0.000555784
Q14498	-3.95276	4.56615e-05	0.000555784
Q14498-2	-3.95276	4.56615e-05	0.000555784
Q14498-3	-3.95276	4.56615e-05	0.000555784
I3L380	-3.95733	4.56796e-05	0.000555784
A0A0A0MT65	-3.96745	1.0872e-05	0.000173817
K7EJ42	-3.98481	4.3594e-06	9.23512e-05
K7EPD0	-3.98481	4.3594e-06	9.23512e-05
K7EQI9	-3.98481	4.3594e-06	9.23512e-05
I3L1X2	-3.98835	1.37714e-05	0.000205675
Q8NB37	-3.99199	1.46349e-05	0.000215696
A0A087WXJ0	-3.99391	0.000120208	0.00135751
C9J0X3	-3.99391	0.000120208	0.00135751
C9J760	-3.99391	0.000120208	0.00135751
C9JSR2	-3.99391	0.000120208	0.00135751
C9K0F0	-3.99391	0.000120208	0.00135751
Q96JY6-2	-3.99391	0.000120208	0.00135751
C9J5W5	-4.00934	3.3681e-05	0.00042822
C9JRV9	-4.00934	3.3681e-05	0.00042822
A0A1B0GTU8	-4.0146	0.000330717	0.00353014
A0A1B0GU12	-4.0146	0.000330717	0.00353014
A0A1B0GUT7	-4.0146	0.000330717	0.00353014
A0A1B0GUV3	-4.0146	0.000330717	0.00353014
A0A1B0GVB9	-4.0146	0.000330717	0.00353014
A0A1B0GVC7	-4.0146	0.000330717	0.00353014
A0A1B0GVI9	-4.0146	0.000330717	0.00353014
A0A1B0GVW0	-4.0146	0.000330717	0.00353014
A0A1B0GWD6	-4.0146	0.000330717	0.00353014
A0A1C7CYW4	-4.0146	0.000330717	0.00353014
B7Z1I9	-4.0146	0.000330717	0.00353014
B7Z413	-4.0146	0.000330717	0.00353014
O75787	-4.0146	0.000330717	0.00353014
O75787-2	-4.0146	0.000330717	0.00353014
E7ET76	-4.01622	5.92124e-06	0.000111354
X6R5W5	-4.01899	5.965e-06	0.000111997
H0YE25	-4.02701	1.30704e-05	0.00019987
H0YF25	-4.02701	1.30704e-05	0.00019987
Q8NB37-2	-4.02701	1.30704e-05	0.00019987
B4DZG7	-4.04692	4.27416e-06	9.15291e-05
D6RD67	-4.05591	7.29406e-05	0.000862297
P49754	-4.05641	5.6684e-06	0.000107161
P49754-2	-4.05641	5.6684e-06	0.000107161
P49754-3	-4.05641	5.6684e-06	0.000107161
A0A0J9YXF2	-4.05812	8.72875e-06	0.000146203
Q15165	-4.05812	8.72875e-06	0.000146203
Q15165-1	-4.05812	8.72875e-06	0.000146203
Q15165-3	-4.05812	8.72875e-06	0.000146203
A0A087WYM3	-4.06293	8.22271e-06	0.00014035
Q8IXJ6	-4.06293	8.22271e-06	0.00014035
Q8IXJ6-2	-4.06293	8.22271e-06	0.00014035
Q8IXJ6-3	-4.06293	8.22271e-06	0.00014035
Q8IXJ6-5	-4.06293	8.22271e-06	0.00014035
A0A590UJE1	-4.06585	2.76119e-05	0.000359898
Q9H2F3	-4.06718	3.75289e-06	8.58995e-05
O14744	-4.079	4.46377e-06	9.34381e-05
O14744-5	-4.079	4.46377e-06	9.34381e-05
A0A2R8Y7Q6	-4.08164	3.5137e-05	0.00044535
F2Z2K0	-4.08275	1.28279e-05	0.00019704
P42338	-4.0843	6.96095e-06	0.000126397
B7ZC38	-4.09339	1.94332e-05	0.000267292
B7ZC39	-4.09339	1.94332e-05	0.000267292
Q9NR46	-4.09339	1.94332e-05	0.000267292
Q9NR46-2	-4.09339	1.94332e-05	0.000267292
Q7Z7N9	-4.09538	1.58082e-05	0.000227929
A0A0B4J2B4	-4.09729	1.22163e-05	0.000190383
K7ELC2	-4.09729	1.22163e-05	0.000190383
K7EM56	-4.09729	1.22163e-05	0.000190383
K7EQJ5	-4.09729	1.22163e-05	0.000190383
P62841	-4.09729	1.22163e-05	0.000190383
S4R417	-4.09729	1.22163e-05	0.000190383
O75489	-4.10177	8.47404e-06	0.000143818
Q9UNZ2-4	-4.10213	9.83122e-06	0.000160189
Q96T76-5	-4.10301	2.53326e-05	0.000332608
A0A3B3IS54	-4.10603	8.36466e-06	0.000142501
Q9UBF2	-4.10783	5.25715e-06	0.000101748
Q9UBF2-2	-4.10783	5.25715e-06	0.000101748
A0A0D9SEM9	-4.11283	3.92057e-06	8.84943e-05
A0A140T9K2	-4.11283	3.92057e-06	8.84943e-05
A0A140T9N3	-4.11283	3.92057e-06	8.84943e-05
Q96I24	-4.11358	1.10916e-05	0.000176884
O60524-5	-4.114	5.31955e-06	0.000102513
H3BV79	-4.11721	2.41733e-05	0.000318489
A0A087WWR6	-4.11979	0.000159213	0.00176792
P49770	-4.1265	1.58707e-05	0.000227959
G3V5Z7	-4.13427	4.21408e-06	9.13641e-05
P60900	-4.13427	4.21408e-06	9.13641e-05
G3V295	-4.14269	4.17479e-06	9.11334e-05
A0A3B3ITK9	-4.14309	1.05721e-05	0.000169779
Q13546	-4.14392	3.87555e-06	8.82337e-05
Q13546-2	-4.14392	3.87555e-06	8.82337e-05
Q9UID3	-4.18004	4.55374e-06	9.34381e-05
Q9UID3-2	-4.18004	4.55374e-06	9.34381e-05
G3V195	-4.18182	9.44641e-06	0.000155748
Q01415	-4.19359	1.11565e-05	0.00017773
O75533	-4.19727	5.50353e-06	0.00010493
M0R0R9	-4.19838	5.45938e-06	0.00010431
P35269	-4.19838	5.45938e-06	0.00010431
O75937	-4.20169	1.19826e-05	0.000188545
S4R3J5	-4.20169	1.19826e-05	0.000188545
P19440-2	-4.20271	4.90777e-06	9.80038e-05
E9PRK2	-4.20382	1.24903e-05	0.000192976
Q96I59	-4.20382	1.24903e-05	0.000192976
H0YDT8	-4.20569	3.49442e-05	0.000443534
Q9NPA0	-4.20569	3.49442e-05	0.000443534
Q5TC02	-4.20617	7.41807e-06	0.000133347
J3QS83	-4.21181	5.00371e-06	9.80038e-05
H3BPE4	-4.21305	0.00136767	0.0142178
Q6UWE0	-4.21319	2.45795e-05	0.000322958
Q6UWE0-2	-4.21319	2.45795e-05	0.000322958
A0A499FIV7	-4.21982	5.22713e-06	0.000101496
Q5JTW6	-4.2241	0.000164484	0.00182532
B4DEM9	-4.24298	4.95986e-06	9.80038e-05
Q9Y2S7	-4.24298	4.95986e-06	9.80038e-05
Q9HB90	-4.24369	5.11551e-06	9.96523e-05
G3V5E5	-4.25797	7.58987e-06	0.000134679
H0YJJ8	-4.25797	7.58987e-06	0.000134679
Q9Y2Q5	-4.26019	6.65668e-06	0.000122486
C9JQM7	-4.26446	1.83553e-05	0.000256803
Q9NUJ1	-4.27304	1.83517e-05	0.000256803
J3KN60	-4.28663	6.31352e-05	0.000752333
I3L113	-4.28994	0.00227734	0.0234566
I3L125	-4.28994	0.00227734	0.0234566
I3L1C8	-4.28994	0.00227734	0.0234566
I3L2J6	-4.28994	0.00227734	0.0234566
I3L2M4	-4.28994	0.00227734	0.0234566
I3L526	-4.28994	0.00227734	0.0234566
M0R0X1	-4.29156	4.1216e-06	9.06347e-05
B3KSI3	-4.29672	0.000129201	0.00145357
O15382-2	-4.29672	0.000129201	0.00145357
C9IZU8	-4.29892	0.000323169	0.00347858
C9J9T0	-4.29892	0.000323169	0.00347858
F8WBT4	-4.29892	0.000323169	0.00347858
Q96AT9	-4.29892	0.000323169	0.00347858
Q96AT9-2	-4.29892	0.000323169	0.00347858
Q96AT9-4	-4.29892	0.000323169	0.00347858
A0A1W2PQK0	-4.30812	8.66137e-05	0.000996335
H0YAM9	-4.32399	3.39658e-06	7.97978e-05
O15530-2	-4.32691	5.16716e-06	0.000100549
Q5JRA6	-4.34823	1.32404e-05	0.000201268
Q5JRA6-2	-4.34823	1.32404e-05	0.000201268
A0A0G2JH50	-4.3528	0.00108026	0.0112823
Q5RIP0	-4.3528	0.00108026	0.0112823
A0A087WYD0	-4.35959	3.88933e-06	8.82337e-05
H7C568	-4.35959	3.88933e-06	8.82337e-05
A0A2R8YDT1	-4.35992	4.74692e-06	9.54818e-05
P15104	-4.35992	4.74692e-06	9.54818e-05
H0YJP2	-4.36226	3.31713e-06	7.84296e-05
Q96JB5-2	-4.3838	2.73817e-06	7.22732e-05
Q86TX2	-4.391	5.17532e-06	0.000100599
Q9BVV7	-4.39235	1.31758e-05	0.000201139
Q96S59	-4.39586	6.52205e-06	0.000120617
Q96S59-2	-4.39586	6.52205e-06	0.000120617
Q96S59-3	-4.39586	6.52205e-06	0.000120617
Q14677	-4.40165	3.06917e-06	7.49395e-05
Q14677-2	-4.40165	3.06917e-06	7.49395e-05
Q14677-3	-4.40165	3.06917e-06	7.49395e-05
G3V2U3	-4.4056	4.07668e-05	0.000504933
H0YJ75	-4.4056	4.07668e-05	0.000504933
Q13362	-4.4056	4.07668e-05	0.000504933
Q13362-2	-4.4056	4.07668e-05	0.000504933
Q13362-3	-4.4056	4.07668e-05	0.000504933
Q13362-4	-4.4056	4.07668e-05	0.000504933
Q13362-5	-4.4056	4.07668e-05	0.000504933
Q96B13	-4.4056	4.07668e-05	0.000504933
O14976	-4.41473	1.02253e-05	0.000165694
O14976-2	-4.41473	1.02253e-05	0.000165694
P46109	-4.41915	1.72392e-05	0.000243084
P49137	-4.42926	1.5943e-05	0.000228585
P49137-2	-4.42926	1.5943e-05	0.000228585
P01034	-4.43034	3.39708e-06	7.97978e-05
Q9H845	-4.43295	2.52513e-06	6.80532e-05
H7C3J0	-4.4346	4.18102e-06	9.11584e-05
Q8WZA9	-4.4352	4.55264e-06	9.34381e-05
O60826	-4.44029	4.68746e-06	9.47111e-05
A6NG45	-4.4484	7.42853e-06	0.000133401
D6RB97	-4.45033	6.36158e-06	0.000118393
D6RBC6	-4.45033	6.36158e-06	0.000118393
C9JCX1	-4.45455	2.90965e-06	7.39633e-05
H7C4Y1	-4.45455	2.90965e-06	7.39633e-05
P19525	-4.46026	4.02563e-06	9.00715e-05
P19525-2	-4.46026	4.02563e-06	9.00715e-05
O15294-4	-4.46857	1.43982e-05	0.000212434
Q9Y5K6	-4.48214	1.10775e-05	0.000176884
E7ETR0	-4.4835	4.40535e-06	9.27763e-05
Q9Y265	-4.4835	4.40535e-06	9.27763e-05
Q9Y265-2	-4.4835	4.40535e-06	9.27763e-05
H7C5K5	-4.48434	2.81857e-06	7.3529e-05
E9PNG3	-4.4859	8.12734e-06	0.000139787
I3L4A6	-4.4878	4.54416e-06	9.34381e-05
Q8NB16	-4.4878	4.54416e-06	9.34381e-05
C9JEH3	-4.48897	2.61954e-05	0.000342183
C9JG97	-4.48897	2.61954e-05	0.000342183
C9JTS3	-4.48897	2.61954e-05	0.000342183
Q13685	-4.48897	2.61954e-05	0.000342183
H3BTH6	-4.49073	1.49416e-05	0.000218598
Q8NEZ5	-4.49073	1.49416e-05	0.000218598
Q8NEZ5-3	-4.49073	1.49416e-05	0.000218598
E9PIK4	-4.4973	5.01448e-06	9.80038e-05
E9PIN5	-4.4973	5.01448e-06	9.80038e-05
E9PKN9	-4.4973	5.01448e-06	9.80038e-05
E9PKZ4	-4.4973	5.01448e-06	9.80038e-05
E9PMW4	-4.4973	5.01448e-06	9.80038e-05
E9PN66	-4.4973	5.01448e-06	9.80038e-05
E9PPM1	-4.4973	5.01448e-06	9.80038e-05
E9PQ46	-4.4973	5.01448e-06	9.80038e-05
E9PS55	-4.4973	5.01448e-06	9.80038e-05
O14683	-4.4973	5.01448e-06	9.80038e-05
U3KQ32	-4.4973	5.01448e-06	9.80038e-05
K7ERP6	-4.49821	3.48546e-06	8.12307e-05
Q5JVC1	-4.50002	7.84194e-05	0.00091514
Q5JVC2	-4.50002	7.84194e-05	0.00091514
Q8N0X4	-4.50002	7.84194e-05	0.00091514
Q8N0X4-2	-4.50002	7.84194e-05	0.00091514
E5RII8	-4.51026	2.85923e-06	7.39633e-05
A0A2R8Y5N2	-4.52554	4.29505e-06	9.15291e-05
A0A2R8Y5S3	-4.52554	4.29505e-06	9.15291e-05
A0A2R8Y6S1	-4.52554	4.29505e-06	9.15291e-05
A0A2R8YFV7	-4.52554	4.29505e-06	9.15291e-05
Q92574	-4.52554	4.29505e-06	9.15291e-05
Q92574-2	-4.52554	4.29505e-06	9.15291e-05
J3KQ40	-4.529	9.16036e-06	0.000152576
O95759	-4.529	9.16036e-06	0.000152576
O95759-2	-4.529	9.16036e-06	0.000152576
K7EMV1	-4.5333	2.30149e-06	6.39032e-05
Q5JVZ8	-4.53397	4.10998e-06	9.04902e-05
A8MVS5	-4.53453	7.06677e-06	0.000128189
Q8N573-3	-4.53711	3.19741e-06	7.63036e-05
Q5T0R8	-4.54071	2.37045e-05	0.000314924
B1AKP8	-4.55062	3.8778e-05	0.000485659
A0A1W2PPS8	-4.55449	4.67522e-06	9.45703e-05
H0Y5K5	-4.55449	4.67522e-06	9.45703e-05
H0Y621	-4.55449	4.67522e-06	9.45703e-05
Q9Y282	-4.55449	4.67522e-06	9.45703e-05
Q9Y282-3	-4.55449	4.67522e-06	9.45703e-05
F8VVB9	-4.55938	4.71268e-06	9.50063e-05
Q9H853	-4.55938	4.71268e-06	9.50063e-05
O60333-3	-4.56085	2.96586e-06	7.39633e-05
F8W0U6	-4.57696	1.13568e-05	0.00018044
J3QRL5	-4.57745	4.46557e-06	9.34381e-05
J3QRM1	-4.58313	2.1756e-06	6.20878e-05
Q96JB5-3	-4.58313	2.1756e-06	6.20878e-05
F8WF66	-4.59146	8.24501e-05	0.000952721
F8WDD5	-4.60024	2.25309e-06	6.27991e-05
F8WEZ6	-4.60024	2.25309e-06	6.27991e-05
A0A2R8YGW0	-4.60714	2.93704e-06	7.39633e-05
P51795	-4.60714	2.93704e-06	7.39633e-05
P51795-2	-4.60714	2.93704e-06	7.39633e-05
H0Y562	-4.61151	3.17726e-06	7.59239e-05
H0Y6E5	-4.61151	3.17726e-06	7.59239e-05
E9PLU0	-4.62313	3.09166e-06	7.50797e-05
E9PRI6	-4.62313	3.09166e-06	7.50797e-05
O00330	-4.62313	3.09166e-06	7.50797e-05
O00330-3	-4.62313	3.09166e-06	7.50797e-05
Q13057	-4.63208	2.90543e-06	7.39633e-05
Q13057-2	-4.63208	2.90543e-06	7.39633e-05
A0A669KBK4	-4.63244	5.33399e-06	0.000102681
A6PVN3	-4.65256	6.42586e-06	0.000119218
B7ZBP5	-4.65256	6.42586e-06	0.000119218
A0A0D9SGJ6	-4.6534	2.94894e-06	7.39633e-05
C9J1Z6	-4.6534	2.94894e-06	7.39633e-05
C9JFZ1	-4.6534	2.94894e-06	7.39633e-05
C9JW66	-4.6534	2.94894e-06	7.39633e-05
J3KPK1	-4.6534	2.94894e-06	7.39633e-05
J3KQV8	-4.6534	2.94894e-06	7.39633e-05
O43426	-4.6534	2.94894e-06	7.39633e-05
O43426-2	-4.6534	2.94894e-06	7.39633e-05
O43426-4	-4.6534	2.94894e-06	7.39633e-05
O43426-5	-4.6534	2.94894e-06	7.39633e-05
J3KST8	-4.66247	6.85244e-06	0.00012468
F2Z2Q6	-4.66335	1.72663e-05	0.000243084
F2Z3P7	-4.66335	1.72663e-05	0.000243084
P30044-3	-4.66624	3.91742e-06	8.84943e-05
H0Y9X9	-4.66798	0.000108027	0.00122613
O15020	-4.67036	1.02834e-05	0.000166335
O15020-2	-4.67036	1.02834e-05	0.000166335
Q9Y3Q8	-4.67207	0.000183087	0.00201429
Q6PL24	-4.6749	2.73938e-05	0.000357315
Q9Y282-2	-4.67491	4.02034e-06	9.00715e-05
Q5JRA6-4	-4.67502	1.14996e-05	0.00018149
B3KWE1	-4.67761	2.35254e-06	6.48649e-05
E9PQL0	-4.68027	3.17563e-06	7.59239e-05
Q86UB9	-4.68027	3.17563e-06	7.59239e-05
Q86UB9-2	-4.68027	3.17563e-06	7.59239e-05
G3V185	-4.68314	1.55796e-05	0.000225534
F8WCH0	-4.69999	4.69775e-05	0.000568872
B3KQ30	-4.71041	4.54669e-06	9.34381e-05
B4DNC9	-4.71041	4.54669e-06	9.34381e-05
F5H5N2	-4.71041	4.54669e-06	9.34381e-05
Q9H1K1	-4.71041	4.54669e-06	9.34381e-05
P04920	-4.72889	2.41936e-06	6.58974e-05
P04920-2	-4.72889	2.41936e-06	6.58974e-05
P04920-3	-4.72889	2.41936e-06	6.58974e-05
K7EK03	-4.72968	2.38205e-05	0.000315202
K7ELJ8	-4.72968	2.38205e-05	0.000315202
K7ESP1	-4.72968	2.38205e-05	0.000315202
B4DVF4	-4.73331	9.99556e-06	0.000162412
Q96DB5-3	-4.73478	8.59615e-05	0.000991379
H3BS53	-4.73485	2.11259e-06	6.15339e-05
A0A0A0MS96	-4.75828	2.27379e-05	0.000304079
P46736-5	-4.75828	2.27379e-05	0.000304079
R4GMV4	-4.76143	4.65385e-06	9.45703e-05
A0A0G2JIF0	-4.7644	0.00122205	0.0127113
A0A1W2PS56	-4.7644	0.00122205	0.0127113
A2BF26	-4.7644	0.00122205	0.0127113
Q9UMX5	-4.76506	0.000482001	0.00511149
I3L2H6	-4.76845	2.95577e-06	7.39633e-05
I3L2Q9	-4.76845	2.95577e-06	7.39633e-05
Q9H2F3-2	-4.76845	2.95577e-06	7.39633e-05
Q15628	-4.77199	8.51219e-06	0.000144192
Q15628-2	-4.77199	8.51219e-06	0.000144192
P78318	-4.77331	1.64458e-05	0.000235229
V9GZ14	-4.77528	8.7597e-06	0.000146584
Q96Q11	-4.77593	6.1375e-06	0.000114819
Q96Q11-2	-4.77593	6.1375e-06	0.000114819
C9JU58	-4.78423	3.00481e-06	7.43816e-05
H0YN00	-4.79025	4.28867e-06	9.15291e-05
A0A3B3IRQ5	-4.79045	7.09275e-05	0.000839051
C9JA29	-4.79045	7.09275e-05	0.000839051
F2Z3F0	-4.79045	7.09275e-05	0.000839051
F8WDT1	-4.79045	7.09275e-05	0.000839051
Q96JG6-2	-4.79045	7.09275e-05	0.000839051
A0A499FIS5	-4.79663	4.08864e-06	9.01312e-05
A0A499FJN1	-4.79663	4.08864e-06	9.01312e-05
A0A499FJS1	-4.79663	4.08864e-06	9.01312e-05
E9PIA0	-4.79663	4.08864e-06	9.01312e-05
Q9BUB5	-4.79663	4.08864e-06	9.01312e-05
Q9BUB5-2	-4.79663	4.08864e-06	9.01312e-05
Q9BUB5-3	-4.79663	4.08864e-06	9.01312e-05
A6NE76	-4.80175	8.57276e-06	0.000144671
G3V3I1	-4.80515	2.48591e-06	6.71982e-05
A0A0U1RRK1	-4.80626	4.08804e-05	0.000504933
A0A286YF11	-4.80626	4.08804e-05	0.000504933
F6XEV2	-4.80626	4.08804e-05	0.000504933
Q9BPX6	-4.80626	4.08804e-05	0.000504933
Q9BPX6-2	-4.80626	4.08804e-05	0.000504933
Q9BPX6-3	-4.80626	4.08804e-05	0.000504933
S4R3D7	-4.80626	4.08804e-05	0.000504933
S4R3V1	-4.80626	4.08804e-05	0.000504933
A0A590UJ74	-4.80788	8.64574e-06	0.000145399
Q9UPY6	-4.80788	8.64574e-06	0.000145399
Q9UPY6-2	-4.80788	8.64574e-06	0.000145399
A0A1B0GXJ2	-4.82143	5.31463e-06	0.000102513
C9JFT1	-4.82143	5.31463e-06	0.000102513
F8WB65	-4.82143	5.31463e-06	0.000102513
C9JUD5	-4.83182	2.27694e-05	0.000304079
F8WFC3	-4.83182	2.27694e-05	0.000304079
H0YER3	-4.8387	4.48866e-06	9.34381e-05
Q8NB37-3	-4.8387	4.48866e-06	9.34381e-05
E7ESK7	-4.86701	2.08258e-05	0.000284025
H0YDZ9	-4.87356	3.62563e-05	0.000458888
E9PE82	-4.87643	1.08161e-05	0.000173077
B0YIZ1	-4.88496	1.99424e-06	5.89505e-05
H7C2A1	-4.88496	1.99424e-06	5.89505e-05
Q0VDF9	-4.88496	1.99424e-06	5.89505e-05
M0R1I1	-4.88697	0.000723757	0.00762562
Q08211	-4.89196	1.2538e-05	0.000193545
F5H6E2	-4.89787	2.13903e-06	6.15339e-05
O00159	-4.89787	2.13903e-06	6.15339e-05
O00159-2	-4.89787	2.13903e-06	6.15339e-05
O00159-3	-4.89787	2.13903e-06	6.15339e-05
P05387	-4.90408	3.55389e-06	8.26106e-05
P35998-2	-4.90419	2.03362e-06	5.98466e-05
B3KNS5	-4.91405	2.1734e-05	0.000293311
Q8WVR3	-4.91405	2.1734e-05	0.000293311
Q8WVR3-2	-4.91405	2.1734e-05	0.000293311
Q8WVR3-3	-4.91405	2.1734e-05	0.000293311
Q13442	-4.92163	1.20884e-05	0.000189515
A0A384DVP2	-4.92553	1.35583e-05	0.000203884
Q6UXS9	-4.92553	1.35583e-05	0.000203884
Q6UXS9-3	-4.92553	1.35583e-05	0.000203884
A6NFY0	-4.93875	1.99191e-06	5.89505e-05
Q9UKE5	-4.93971	5.85434e-05	0.00070041
Q9UKE5-2	-4.93971	5.85434e-05	0.00070041
Q9UKE5-3	-4.93971	5.85434e-05	0.00070041
Q9UKE5-4	-4.93971	5.85434e-05	0.00070041
Q9UKE5-5	-4.93971	5.85434e-05	0.00070041
Q9UKE5-6	-4.93971	5.85434e-05	0.00070041
Q9UKE5-7	-4.93971	5.85434e-05	0.00070041
Q9UKE5-8	-4.93971	5.85434e-05	0.00070041
Q14141-3	-4.94327	3.9846e-06	8.97137e-05
I3L1S3	-4.94389	6.55312e-06	0.000120828
P17252	-4.94935	3.59897e-06	8.3442e-05
H0Y2L7	-4.97584	1.39675e-05	0.000208363
P15289-2	-4.98879	2.70036e-06	7.13804e-05
E9PPP8	-4.99053	9.58665e-06	0.000157247
C9J7E5	-4.99196	7.11346e-06	0.000128775
Q9Y5L0-1	-4.99196	7.11346e-06	0.000128775
E9PMY0	-4.99306	4.96901e-06	9.80038e-05
E9PNB3	-4.99306	4.96901e-06	9.80038e-05
O15229	-5.00158	4.21594e-06	9.13641e-05
O15229-2	-5.00158	4.21594e-06	9.13641e-05
O15229-3	-5.00158	4.21594e-06	9.13641e-05
A0A3B3IRM4	-5.01078	5.64749e-06	0.000107105
O75191	-5.01078	5.64749e-06	0.000107105
O75191-2	-5.01078	5.64749e-06	0.000107105
A0A0G2JKF1	-5.01324	1.00783e-05	0.000163608
Q99615-2	-5.01383	8.4611e-06	0.000143734
H7C0Q6	-5.02431	4.5619e-06	9.34381e-05
Q9C037-3	-5.02431	4.5619e-06	9.34381e-05
E9PPC9	-5.05442	3.81168e-06	8.70228e-05
Q6ZSX4	-5.05442	3.81168e-06	8.70228e-05
H7C3X0	-5.05584	4.16477e-06	9.10256e-05
O60502	-5.05584	4.16477e-06	9.10256e-05
O60502-2	-5.05584	4.16477e-06	9.10256e-05
O60502-3	-5.05584	4.16477e-06	9.10256e-05
O60502-4	-5.05584	4.16477e-06	9.10256e-05
E7ENQ8	-5.06408	8.08682e-06	0.000139224
O00391	-5.07046	1.06087e-05	0.000170062
O00391-2	-5.07046	1.06087e-05	0.000170062
Q9Y5L0-5	-5.08163	5.2399e-06	0.000101634
E9PK45	-5.08197	0.000106622	0.00121095
E9PKM5	-5.08197	0.000106622	0.00121095
E9PQR3	-5.08197	0.000106622	0.00121095
A0A140T9Q4	-5.08685	0.00185939	0.019229
A0A140TA19	-5.08685	0.00185939	0.019229
H7C0K6	-5.09851	1.99853e-06	5.89505e-05
O43896	-5.09851	1.99853e-06	5.89505e-05
Q15126	-5.11693	1.69044e-06	5.47849e-05
H7C0V8	-5.13309	9.67805e-06	0.000158402
H7C4C4	-5.13309	9.67805e-06	0.000158402
Q96F24	-5.13351	1.32128e-05	0.00020119
Q96F24-2	-5.13351	1.32128e-05	0.00020119
Q96F24-3	-5.13351	1.32128e-05	0.00020119
P02786	-5.14137	7.25223e-06	0.000130759
P53985	-5.14367	1.71469e-06	5.5073e-05
P53985-2	-5.14367	1.71469e-06	5.5073e-05
Q5T8R3	-5.14367	1.71469e-06	5.5073e-05
Q5T8R5	-5.14367	1.71469e-06	5.5073e-05
H0Y746	-5.15774	1.26846e-05	0.000195472
H0Y7V3	-5.15774	1.26846e-05	0.000195472
P51798	-5.18739	3.46908e-06	8.09542e-05
P51798-2	-5.18739	3.46908e-06	8.09542e-05
C9JAL9	-5.19792	1.84095e-05	0.00025736
B1AH48	-5.20425	1.04927e-05	0.000168807
Q9UL42	-5.20425	1.04927e-05	0.000168807
A0A3B3ITZ9	-5.20932	6.9844e-05	0.000828969
Q9Y2W1	-5.20932	6.9844e-05	0.000828969
Q5RI15	-5.21347	1.83988e-06	5.67543e-05
Q5RI15-2	-5.21347	1.83988e-06	5.67543e-05
H7BZ35	-5.23461	2.88274e-06	7.39633e-05
A0A590UK28	-5.23824	2.04293e-06	5.99237e-05
A0A590UKA4	-5.23824	2.04293e-06	5.99237e-05
F5GWI9	-5.24227	7.57571e-06	0.000134679
F5GXZ7	-5.24227	7.57571e-06	0.000134679
F5GZ97	-5.24227	7.57571e-06	0.000134679
H0YGN0	-5.24227	7.57571e-06	0.000134679
Q9Y3C0	-5.24227	7.57571e-06	0.000134679
P12081	-5.26585	1.53369e-06	5.07135e-05
P12081-4	-5.26585	1.53369e-06	5.07135e-05
A0A087WX97	-5.28017	2.42675e-06	6.58974e-05
Q9BXK5	-5.28017	2.42675e-06	6.58974e-05
Q9BXK5-2	-5.28017	2.42675e-06	6.58974e-05
B4DVL2	-5.2805	2.81011e-06	7.3415e-05
H0Y988	-5.2805	2.81011e-06	7.3415e-05
Q02083	-5.2805	2.81011e-06	7.3415e-05
Q02083-2	-5.2805	2.81011e-06	7.3415e-05
R4GNC0	-5.2805	2.81011e-06	7.3415e-05
H0YC95	-5.29456	1.55032e-05	0.000224796
Q9BS92	-5.29963	4.07344e-06	9.01312e-05
K7EMU3	-5.30745	5.54421e-06	0.000105481
P53355-2	-5.3228	3.04604e-06	7.46801e-05
A0A087WWY0	-5.32294	0.0014338	0.0148879
P08519	-5.32294	0.0014338	0.0148879
E9PKY6	-5.3268	5.3609e-05	0.000645252
H0YCQ6	-5.3268	5.3609e-05	0.000645252
O75886	-5.33333	6.15151e-06	0.000114841
O75886-2	-5.33333	6.15151e-06	0.000114841
F5GXD8	-5.33811	2.0601e-06	6.03287e-05
A0A087WVI0	-5.35409	3.17076e-06	7.59239e-05
E9PBL8	-5.35409	3.17076e-06	7.59239e-05
Q8WTW3	-5.35409	3.17076e-06	7.59239e-05
Q9Y5L0	-5.35545	4.32886e-06	9.20306e-05
Q9Y5L0-3	-5.35545	4.32886e-06	9.20306e-05
Q9NUJ1-3	-5.358	5.92065e-06	0.000111354
E9PQ68	-5.36069	1.39311e-06	4.83423e-05
K9J7I2	-5.36069	1.39311e-06	4.83423e-05
O95169	-5.36069	1.39311e-06	4.83423e-05
O95169-2	-5.36069	1.39311e-06	4.83423e-05
O95169-3	-5.36069	1.39311e-06	4.83423e-05
A2RRP1	-5.37763	1.19246e-06	4.5087e-05
A2RRP1-2	-5.37763	1.19246e-06	4.5087e-05
F5H1M6	-5.3815	3.82771e-05	0.000479721
F6SFZ6	-5.3815	3.82771e-05	0.000479721
Q99571	-5.3815	3.82771e-05	0.000479721
Q99571-2	-5.3815	3.82771e-05	0.000479721
Q99571-3	-5.3815	3.82771e-05	0.000479721
F2Z2B1	-5.40366	7.54774e-05	0.000890524
A0A0J9YWL0	-5.40699	1.32802e-06	4.74121e-05
Q9Y4K1	-5.40699	1.32802e-06	4.74121e-05
Q86YZ3	-5.41141	0.000127248	0.0014334
A0A087X0L7	-5.41793	1.23299e-05	0.000190991
C9JC63	-5.41793	1.23299e-05	0.000190991
E7EVY0	-5.41793	1.23299e-05	0.000190991
J3KNA0	-5.41793	1.23299e-05	0.000190991
Q15070	-5.41793	1.23299e-05	0.000190991
Q15070-2	-5.41793	1.23299e-05	0.000190991
Q15070-3	-5.41793	1.23299e-05	0.000190991
O75131	-5.45027	1.42452e-06	4.90966e-05
M0R026	-5.45242	8.64833e-06	0.000145399
M0R0A9	-5.45301	2.16128e-06	6.20745e-05
H7C111	-5.45987	0.000409282	0.00434546
A0A494C1K6	-5.46602	1.64401e-05	0.000235229
A0A494BZZ1	-5.46914	2.40813e-06	6.58974e-05
P09601	-5.47108	2.55374e-06	6.86179e-05
Q9UJY5-3	-5.48221	2.79443e-06	7.3415e-05
C9JY63	-5.48408	1.43513e-06	4.92729e-05
E5RFD1	-5.48408	1.43513e-06	4.92729e-05
P34059	-5.50553	2.97036e-06	7.39633e-05
P23497	-5.51005	1.62099e-06	5.30135e-05
P29803	-5.51195	3.151e-05	0.000403951
P32456	-5.5704	1.22214e-06	4.58227e-05
O60906	-5.57595	5.3399e-06	0.000102684
B1AHA8	-5.57929	2.40766e-06	6.58974e-05
Q8IV04	-5.58573	2.29599e-06	6.38956e-05
Q9NUJ1-2	-5.58649	3.37758e-06	7.97042e-05
Q9Y2Z9	-5.59237	1.22207e-06	4.58227e-05
Q9Y2Z9-3	-5.59237	1.22207e-06	4.58227e-05
A1L0T0	-5.59527	6.25602e-06	0.000116671
D6RF87	-5.6046	5.00843e-06	9.80038e-05
E9PII3	-5.60662	1.24132e-06	4.60599e-05
O43491-2	-5.60662	1.24132e-06	4.60599e-05
O43491-3	-5.60662	1.24132e-06	4.60599e-05
E9PFH4	-5.60774	3.02289e-06	7.45198e-05
Q6PCE3	-5.61594	1.27613e-06	4.68655e-05
Q99943	-5.62922	5.10383e-06	9.9533e-05
A0A494C1T7	-5.66036	5.74585e-06	0.000108511
C9JVG0	-5.66875	2.62319e-06	7.00477e-05
H3BRS6	-5.68817	0.000194911	0.00214306
A0A590UJX5	-5.71377	2.75319e-06	7.25627e-05
A0A0A0MQU3	-5.7295	1.92563e-06	5.84935e-05
P62837	-5.7295	1.92563e-06	5.84935e-05
Q86VR2	-5.73521	1.15394e-06	4.43797e-05
S4R314	-5.74962	6.80068e-06	0.000124116
S4R352	-5.74962	6.80068e-06	0.000124116
P11717	-5.75284	3.24936e-06	7.69286e-05
E9PJ47	-5.75981	1.34669e-06	4.74174e-05
E9PJX1	-5.75981	1.34669e-06	4.74174e-05
E9PMQ3	-5.75981	1.34669e-06	4.74174e-05
E9PNY1	-5.75981	1.34669e-06	4.74174e-05
E9PQ47	-5.75981	1.34669e-06	4.74174e-05
E9PQA5	-5.75981	1.34669e-06	4.74174e-05
O95159	-5.75981	1.34669e-06	4.74174e-05
A0A1B0GTM0	-5.76571	3.18335e-05	0.000407806
H3BQ53	-5.76588	0.000100014	0.00113806
H3BRP4	-5.76588	0.000100014	0.00113806
H3BSS3	-5.76588	0.000100014	0.00113806
Q9BQ70	-5.76588	0.000100014	0.00113806
Q9H384	-5.76588	0.000100014	0.00113806
C9J338	-5.76978	4.58633e-05	0.000557262
I3L2I2	-5.76978	4.58633e-05	0.000557262
Q15836	-5.77151	6.42026e-06	0.000119218
E9PFL9	-5.78032	4.24845e-05	0.000520798
A0A0A0MSS4	-5.78512	1.36572e-06	4.7899e-05
A0A0A0MSU9	-5.78512	1.36572e-06	4.7899e-05
C9J035	-5.80072	2.24841e-06	6.27991e-05
C9J722	-5.80072	2.24841e-06	6.27991e-05
C9J9M9	-5.80072	2.24841e-06	6.27991e-05
C9JVC2	-5.80072	2.24841e-06	6.27991e-05
O95551	-5.80852	7.94768e-06	0.000137489
O95551-2	-5.80852	7.94768e-06	0.000137489
A0A590UJ44	-5.82152	1.46995e-06	5.00648e-05
A0A590UK69	-5.82152	1.46995e-06	5.00648e-05
F5GYB0	-5.82152	1.46995e-06	5.00648e-05
H7C4A0	-5.82758	1.12067e-05	0.000178371
H0Y8Z9	-5.83091	8.75028e-07	3.73629e-05
A0A3B3IRE4	-5.84151	1.14902e-05	0.00018149
Q6NSW5	-5.84151	1.14902e-05	0.00018149
Q8TCE6	-5.84151	1.14902e-05	0.00018149
Q8TCE6-2	-5.84151	1.14902e-05	0.00018149
C9J6V3	-5.84581	3.92514e-05	0.000490218
E9PJV5	-5.84581	3.92514e-05	0.000490218
E9PSB4	-5.84581	3.92514e-05	0.000490218
Q32P44-3	-5.84581	3.92514e-05	0.000490218
A0A087X0Q9	-5.8567	4.0217e-06	9.00715e-05
Q9BVL4	-5.8567	4.0217e-06	9.00715e-05
B4DDD8	-5.86031	1.23499e-06	4.60599e-05
Q9H269	-5.86754	1.18844e-06	4.5087e-05
Q7Z319	-5.86882	1.6657e-06	5.40809e-05
A0A087WUR6	-5.87604	1.48494e-05	0.000217962
Q8IU85	-5.87604	1.48494e-05	0.000217962
Q8IU85-2	-5.87604	1.48494e-05	0.000217962
E9PJ44	-5.87899	5.38802e-06	0.000103388
E9PJB9	-5.87899	5.38802e-06	0.000103388
Q8WUW1	-5.90205	2.95701e-05	0.000382363
Q8WUW1-2	-5.90205	2.95701e-05	0.000382363
A0A2R8Y5B3	-5.90298	2.69859e-06	7.13804e-05
K7EJL5	-5.94366	7.55922e-06	0.000134679
K7EJV7	-5.94366	7.55922e-06	0.000134679
K7EN19	-5.94366	7.55922e-06	0.000134679
K7EPP7	-5.94366	7.55922e-06	0.000134679
K7ER44	-5.94366	7.55922e-06	0.000134679
P62854	-5.95168	1.00758e-06	4.13737e-05
G3V0E5	-5.96844	3.88652e-06	8.82337e-05
H0Y3Y3	-5.96949	4.84238e-06	9.71838e-05
Q9BV40	-5.96991	1.77296e-05	0.000249251
A0A494C0B4	-5.9739	4.28397e-06	9.15291e-05
P54725	-5.9739	4.28397e-06	9.15291e-05
P54725-2	-5.9739	4.28397e-06	9.15291e-05
P54725-3	-5.9739	4.28397e-06	9.15291e-05
K7EIU0	-5.98373	2.13209e-06	6.15339e-05
A0A494C0A9	-5.98815	3.03535e-06	7.45198e-05
Q13951	-5.98815	3.03535e-06	7.45198e-05
Q13951-2	-5.98815	3.03535e-06	7.45198e-05
H0Y4Q3	-5.99109	1.13396e-06	4.40841e-05
F8W1W1	-5.99451	1.29087e-06	4.70222e-05
G3V532	-5.99539	1.31313e-05	0.00020063
D6RER6	-6.00609	1.84572e-06	5.68367e-05
Q8WUK0-2	-6.00685	2.43401e-06	6.59946e-05
B1AK20	-6.01218	1.01345e-06	4.13737e-05
Q5TH61	-6.01218	1.01345e-06	4.13737e-05
A0A087WT95	-6.04001	1.39994e-06	4.83423e-05
A0A087X0W7	-6.04001	1.39994e-06	4.83423e-05
P49753	-6.04001	1.39994e-06	4.83423e-05
Q8N565	-6.05588	3.10636e-06	7.52151e-05
Q8N565-2	-6.05588	3.10636e-06	7.52151e-05
M0R301	-6.09153	1.28717e-06	4.6983e-05
F8W8A6	-6.09467	1.12966e-06	4.40841e-05
H7C1A5	-6.09467	1.12966e-06	4.40841e-05
Q9Y4K1-2	-6.09943	8.1202e-07	3.65067e-05
B3KY94	-6.11742	1.26448e-06	4.6534e-05
O14735-3	-6.11742	1.26448e-06	4.6534e-05
B8ZZT4	-6.12167	1.54611e-05	0.000224368
P35558-2	-6.12423	2.86854e-05	0.000373076
B4DW98	-6.12947	2.13338e-06	6.15339e-05
Q9NQ25-2	-6.12947	2.13338e-06	6.15339e-05
Q9NQ25-7	-6.12947	2.13338e-06	6.15339e-05
B5MCK8	-6.13356	9.86908e-07	4.06606e-05
Q86TM6	-6.15225	1.15262e-06	4.43797e-05
Q86TM6-2	-6.15225	1.15262e-06	4.43797e-05
Q86TM6-3	-6.15225	1.15262e-06	4.43797e-05
Q9NPH2	-6.15772	7.13158e-07	3.41744e-05
Q9NPH2-2	-6.15772	7.13158e-07	3.41744e-05
Q9NPH2-3	-6.15772	7.13158e-07	3.41744e-05
Q9Y613	-6.18618	1.92376e-05	0.000265416
Q5T440	-6.18771	2.23944e-05	0.000300638
C9JCK5	-6.20827	7.34616e-07	3.41953e-05
P86790	-6.21064	1.05725e-06	4.258e-05
O14744-2	-6.21852	7.69635e-07	3.50977e-05
O14744-3	-6.21852	7.69635e-07	3.50977e-05
O14744-4	-6.21852	7.69635e-07	3.50977e-05
F8VVI6	-6.22809	9.07216e-07	3.79886e-05
D6RDG2	-6.23858	1.4109e-05	0.000208632
D6RDY5	-6.23858	1.4109e-05	0.000208632
Q5HYF5	-6.23858	1.4109e-05	0.000208632
Q8TEA7	-6.23858	1.4109e-05	0.000208632
Q8TEA7-2	-6.23858	1.4109e-05	0.000208632
Q8TEA7-3	-6.23858	1.4109e-05	0.000208632
E7EMS6	-6.24703	5.00585e-06	9.80038e-05
Q16401	-6.26697	8.7132e-07	3.73629e-05
Q16401-2	-6.26697	8.7132e-07	3.73629e-05
H0YMC2	-6.27999	2.22058e-05	0.00029833
B4DEZ3	-6.31997	2.24083e-06	6.27991e-05
E7ENQ6	-6.31997	2.24083e-06	6.27991e-05
K7EJE1	-6.31997	2.24083e-06	6.27991e-05
Q9P0J0	-6.31997	2.24083e-06	6.27991e-05
Q9P0J0-2	-6.31997	2.24083e-06	6.27991e-05
U3KQP3	-6.31997	2.24083e-06	6.27991e-05
G3V3U4	-6.32537	1.22532e-06	4.58459e-05
Q9UNZ2-6	-6.32706	1.90786e-06	5.825e-05
C9J3F8	-6.33732	4.48551e-06	9.34381e-05
H7BXH3	-6.33732	4.48551e-06	9.34381e-05
C9JZT2	-6.39357	6.53492e-06	0.000120617
F8WBH4	-6.39357	6.53492e-06	0.000120617
A0A2R8YCI2	-6.39915	9.75248e-07	4.03658e-05
D6RF05	-6.39915	9.75248e-07	4.03658e-05
P36551-2	-6.43267	6.73538e-07	3.40032e-05
Q9BT22	-6.43884	1.49277e-06	5.00648e-05
A0A5F9ZH11	-6.4957	8.11319e-05	0.000939914
A0A5F9ZHW9	-6.4957	8.11319e-05	0.000939914
A0A5F9ZHX4	-6.4957	8.11319e-05	0.000939914
P55201	-6.4957	8.11319e-05	0.000939914
P55201-2	-6.4957	8.11319e-05	0.000939914
P55201-3	-6.4957	8.11319e-05	0.000939914
P55201-4	-6.4957	8.11319e-05	0.000939914
Q63HN8-5	-6.50425	0.000133706	0.00150142
A8MYZ9	-6.51268	1.19708e-06	4.51664e-05
Q9NRD5	-6.54913	6.08186e-07	3.16869e-05
Q9Y2D5	-6.55068	3.24759e-06	7.69286e-05
Q9Y2D5-4	-6.55068	3.24759e-06	7.69286e-05
Q9Y2D5-5	-6.55068	3.24759e-06	7.69286e-05
Q9Y2D5-6	-6.55068	3.24759e-06	7.69286e-05
Q9Y2D5-7	-6.55068	3.24759e-06	7.69286e-05
C9J4G7	-6.56741	1.61185e-05	0.000230916
F6SFB5	-6.56935	1.07119e-06	4.30447e-05
F8VVX6	-6.5713	0.000150614	0.00167763
Q5HYK3	-6.5713	0.000150614	0.00167763
A2VDF0	-6.59612	3.04784e-05	0.000392974
A2VDF0-2	-6.59612	3.04784e-05	0.000392974
X6RK00	-6.59612	3.04784e-05	0.000392974
O95758	-6.59614	1.98809e-06	5.89505e-05
O95758-1	-6.59614	1.98809e-06	5.89505e-05
O95758-2	-6.59614	1.98809e-06	5.89505e-05
O95758-4	-6.59614	1.98809e-06	5.89505e-05
O95758-5	-6.59614	1.98809e-06	5.89505e-05
O95758-6	-6.59614	1.98809e-06	5.89505e-05
O95758-7	-6.59614	1.98809e-06	5.89505e-05
P36268	-6.6046	7.95536e-07	3.59133e-05
P36268-2	-6.6046	7.95536e-07	3.59133e-05
P36268-3	-6.6046	7.95536e-07	3.59133e-05
Q9BTZ2-3	-6.60495	9.85686e-07	4.06606e-05
H0YDG7	-6.6447	1.64654e-06	5.36532e-05
K7EMK8	-6.65435	7.35113e-06	0.000132276
H0Y599	-6.65838	1.05191e-06	4.24601e-05
Q8N1I0	-6.65838	1.05191e-06	4.24601e-05
Q8N1I0-2	-6.65838	1.05191e-06	4.24601e-05
Q8N1I0-3	-6.65838	1.05191e-06	4.24601e-05
P78325	-6.66419	6.72739e-06	0.000123155
P78325-2	-6.66419	6.72739e-06	0.000123155
P78325-3	-6.66419	6.72739e-06	0.000123155
E7ETE2	-6.67769	7.87322e-07	3.58132e-05
A0A3B3ISX8	-6.68149	2.45375e-06	6.64293e-05
Q9NXC5	-6.69632	2.49338e-06	6.72988e-05
E9PKT2	-6.71621	1.24794e-05	0.000192976
Q6UX71	-6.73461	2.1731e-06	6.20878e-05
Q6UX71-2	-6.73461	2.1731e-06	6.20878e-05
G3V2L5	-6.73981	1.11227e-06	4.40841e-05
G3V434	-6.73981	1.11227e-06	4.40841e-05
G3V4A6	-6.73981	1.11227e-06	4.40841e-05
Q86YV9	-6.76741	8.60286e-07	3.73629e-05
A0A5F9UK94	-6.77367	6.94487e-07	3.40189e-05
H0Y360	-6.77367	6.94487e-07	3.40189e-05
Q01433	-6.77367	6.94487e-07	3.40189e-05
Q01433-2	-6.77367	6.94487e-07	3.40189e-05
Q01433-3	-6.77367	6.94487e-07	3.40189e-05
Q01433-4	-6.77367	6.94487e-07	3.40189e-05
Q01433-5	-6.77367	6.94487e-07	3.40189e-05
O14523	-6.81724	1.8318e-06	5.67003e-05
O14523-2	-6.81724	1.8318e-06	5.67003e-05
P12110	-6.81761	8.21457e-06	0.00014035
P12110-2	-6.81761	8.21457e-06	0.00014035
P12110-3	-6.81761	8.21457e-06	0.00014035
A0A0G2JH68	-6.83944	8.81849e-07	3.73629e-05
A0A140T8Z0	-6.83944	8.81849e-07	3.73629e-05
A0A2R8Y5N1	-6.83944	8.81849e-07	3.73629e-05
H9KV28	-6.83944	8.81849e-07	3.73629e-05
O60610	-6.83944	8.81849e-07	3.73629e-05
O60610-2	-6.83944	8.81849e-07	3.73629e-05
O60610-3	-6.83944	8.81849e-07	3.73629e-05
F8VWV8	-6.85888	8.92226e-06	0.000149026
Q9H269-2	-6.86333	5.8064e-07	3.1534e-05
J3QRU1	-6.87424	8.75817e-07	3.73629e-05
P06241	-6.87424	8.75817e-07	3.73629e-05
P06241-2	-6.87424	8.75817e-07	3.73629e-05
P06241-3	-6.87424	8.75817e-07	3.73629e-05
P07947	-6.87424	8.75817e-07	3.73629e-05
Q9BVK6	-6.925	2.3034e-06	6.39032e-05
H3BT13	-6.9752	4.77999e-07	2.79957e-05
P62318	-6.9752	4.77999e-07	2.79957e-05
P62318-2	-6.9752	4.77999e-07	2.79957e-05
Q96S99	-7.01129	2.54362e-06	6.84486e-05
F2Z3L7	-7.02533	5.57348e-07	3.07786e-05
H3BQ10	-7.03989	1.08946e-06	4.36808e-05
H7C236	-7.06942	7.12849e-07	3.41744e-05
H7C2J7	-7.06942	7.12849e-07	3.41744e-05
G5E9E9	-7.06945	8.95749e-07	3.76524e-05
A0A1W2PPC6	-7.08021	5.65012e-07	3.07786e-05
Q9H3H5	-7.08021	5.65012e-07	3.07786e-05
Q9H3H5-2	-7.08021	5.65012e-07	3.07786e-05
Q9H3H5-3	-7.08021	5.65012e-07	3.07786e-05
K7EL81	-7.08073	7.37674e-07	3.41953e-05
Q9BZL4	-7.08073	7.37674e-07	3.41953e-05
Q9BZL4-2	-7.08073	7.37674e-07	3.41953e-05
Q9BZL4-3	-7.08073	7.37674e-07	3.41953e-05
Q9BZL4-4	-7.08073	7.37674e-07	3.41953e-05
K7EID2	-7.10155	2.20691e-06	6.26819e-05
Q9BT22-2	-7.10155	2.20691e-06	6.26819e-05
O60664	-7.11396	6.66948e-07	3.37656e-05
A0A0D9SES7	-7.14246	5.1637e-07	2.91019e-05
A0A0D9SF91	-7.14246	5.1637e-07	2.91019e-05
J3QRZ1	-7.14351	4.54362e-06	9.34381e-05
Q9GZM8	-7.14351	4.54362e-06	9.34381e-05
Q9GZM8-2	-7.14351	4.54362e-06	9.34381e-05
Q9GZM8-3	-7.14351	4.54362e-06	9.34381e-05
K7EJY8	-7.16919	1.24768e-06	4.62002e-05
G3V1W4	-7.19409	1.75953e-06	5.53234e-05
G3V2R6	-7.19409	1.75953e-06	5.53234e-05
G3V3G5	-7.19409	1.75953e-06	5.53234e-05
G3V4V1	-7.19409	1.75953e-06	5.53234e-05
A0A0D9SFI9	-7.19656	5.06378e-07	2.89946e-05
I3L4U9	-7.19656	5.06378e-07	2.89946e-05
H0YN31	-7.21502	3.10983e-06	7.52151e-05
H0YE27	-7.21816	5.97418e-06	0.000111997
H3BNG3	-7.21816	5.97418e-06	0.000111997
E9PS48	-7.22142	1.56487e-06	5.14599e-05
O75489-2	-7.22142	1.56487e-06	5.14599e-05
P23919	-7.22311	6.84579e-07	3.40189e-05
P23919-2	-7.22311	6.84579e-07	3.40189e-05
A0A3B3ITU1	-7.22831	1.17479e-06	4.47017e-05
H0YK75	-7.22831	1.17479e-06	4.47017e-05
Q9Y2R0	-7.23606	8.97085e-07	3.76524e-05
O60664-4	-7.23875	6.19171e-07	3.19792e-05
A0A087X0N2	-7.24194	1.80456e-06	5.60507e-05
O15243	-7.24194	1.80456e-06	5.60507e-05
H0YDX2	-7.2506	3.68016e-05	0.000465461
J3KRX8	-7.26399	4.46168e-07	2.76574e-05
J3KTA4	-7.26399	4.46168e-07	2.76574e-05
J3KTQ4	-7.26399	4.46168e-07	2.76574e-05
J3QR02	-7.26399	4.46168e-07	2.76574e-05
J3QRQ7	-7.26399	4.46168e-07	2.76574e-05
P17844	-7.26399	4.46168e-07	2.76574e-05
P17844-2	-7.26399	4.46168e-07	2.76574e-05
X6RLV5	-7.26399	4.46168e-07	2.76574e-05
E7ERC4	-7.27932	1.20971e-05	0.000189515
E9PGX9	-7.27932	1.20971e-05	0.000189515
A0A087X2D2	-7.28783	2.66775e-06	7.07271e-05
H0YDH3	-7.30444	1.31476e-06	4.71264e-05
H0YED2	-7.30444	1.31476e-06	4.71264e-05
O95551-3	-7.30795	9.58994e-06	0.000157247
X6R5A3	-7.30795	9.58994e-06	0.000157247
A0A096LNZ0	-7.32367	1.01174e-06	4.13737e-05
P50453	-7.37015	1.61087e-06	5.27787e-05
Q5JNZ5	-7.40714	6.93384e-07	3.40189e-05
F8VZX1	-7.45195	6.92371e-06	0.000125849
H3BMF4	-7.4673	1.13247e-06	4.40841e-05
Q9H2V7	-7.4673	1.13247e-06	4.40841e-05
Q9H2V7-2	-7.4673	1.13247e-06	4.40841e-05
Q9H2V7-3	-7.4673	1.13247e-06	4.40841e-05
Q96E11-2	-7.48001	9.77114e-06	0.000159634
P49753-2	-7.58778	6.07889e-07	3.16869e-05
Q96CN9	-7.60583	3.39726e-06	7.97978e-05
Q70J99	-7.63196	8.70259e-07	3.73629e-05
Q70J99-3	-7.63196	8.70259e-07	3.73629e-05
A0A087X1X9	-7.6649	4.44157e-06	9.33198e-05
Q8IYB5	-7.6649	4.44157e-06	9.33198e-05
Q9Y6C2	-7.703	7.4222e-07	3.41953e-05
P61457	-7.70335	1.28134e-06	4.68655e-05
C9JD65	-7.7116	4.83349e-06	9.71141e-05
K7EM73	-7.72707	4.50228e-07	2.76574e-05
A0A0A0MRH6	-7.73749	4.38184e-06	9.2717e-05
Q86X83	-7.74192	5.12416e-07	2.91019e-05
Q86X83-2	-7.74192	5.12416e-07	2.91019e-05
A0A1B0GXG3	-7.75436	1.50569e-06	5.00648e-05
E5RFL9	-7.75436	1.50569e-06	5.00648e-05
E5RGZ0	-7.75436	1.50569e-06	5.00648e-05
E5RHC8	-7.75436	1.50569e-06	5.00648e-05
E5RHE8	-7.75436	1.50569e-06	5.00648e-05
E5RI78	-7.75436	1.50569e-06	5.00648e-05
E5RI95	-7.75436	1.50569e-06	5.00648e-05
E5RIA5	-7.75436	1.50569e-06	5.00648e-05
E5RIG4	-7.75436	1.50569e-06	5.00648e-05
E5RIZ1	-7.75436	1.50569e-06	5.00648e-05
E5RJJ6	-7.75436	1.50569e-06	5.00648e-05
E5RJT1	-7.75436	1.50569e-06	5.00648e-05
E5RK89	-7.75436	1.50569e-06	5.00648e-05
H7C2K2	-7.75726	1.35462e-05	0.000203884
Q9NZQ3	-7.75726	1.35462e-05	0.000203884
Q9NZQ3-2	-7.75726	1.35462e-05	0.000203884
Q9NZQ3-3	-7.75726	1.35462e-05	0.000203884
Q9NZQ3-4	-7.75726	1.35462e-05	0.000203884
Q9NZQ3-5	-7.75726	1.35462e-05	0.000203884
Q9Y266	-7.79115	5.34586e-07	2.98469e-05
F5GWU4	-7.82069	1.7194e-06	5.51255e-05
H7BZ20	-7.8604	1.70076e-05	0.000240576
H7C312	-7.8604	1.70076e-05	0.000240576
Q08257-2	-7.87034	1.65526e-06	5.38396e-05
U3KQ93	-7.87937	4.64431e-07	2.78771e-05
I3L2V0	-7.8843	4.38322e-07	2.76574e-05
H0YJY6	-7.89389	4.38602e-07	2.76574e-05
H7BZ44	-7.89389	4.38602e-07	2.76574e-05
H0Y9R3	-7.91236	1.57963e-06	5.18499e-05
H3BPT8	-7.91391	1.75193e-06	5.53234e-05
B4DP72	-7.92255	0.000284543	0.00307574
C9JAG4	-7.92686	9.25867e-07	3.85893e-05
C9JYV9	-7.92686	9.25867e-07	3.85893e-05
H0YDD8	-7.94246	3.37994e-06	7.97042e-05
X6RI56	-7.97202	3.52107e-07	2.76574e-05
C9J5M2	-8.02701	1.0392e-05	0.000167488
C9JLA8	-8.02701	1.0392e-05	0.000167488
F8WAR0	-8.02701	1.0392e-05	0.000167488
O60664-3	-8.09979	4.64763e-07	2.78771e-05
Q8N511	-8.15856	4.10513e-05	0.000506695
P53355	-8.16616	6.56762e-07	3.33442e-05
P53355-3	-8.16616	6.56762e-07	3.33442e-05
P53355-4	-8.16616	6.56762e-07	3.33442e-05
C9J0S9	-8.20523	4.52007e-07	2.76574e-05
K7EJE9	-8.22027	1.39746e-05	0.000208363
Q96DZ1	-8.24598	2.95095e-06	7.39633e-05
Q96DZ1-2	-8.24598	2.95095e-06	7.39633e-05
Q96DZ1-3	-8.24598	2.95095e-06	7.39633e-05
A0A2R8YGB7	-8.27903	5.44153e-06	0.000104191
B1AXG2	-8.27903	5.44153e-06	0.000104191
H3BR82	-8.29635	1.16099e-06	4.45552e-05
Q5JUE9	-8.32133	1.17932e-05	0.00018589
L7P8G6	-8.35436	3.16058e-07	2.61032e-05
P42898	-8.35436	3.16058e-07	2.61032e-05
P42898-2	-8.35436	3.16058e-07	2.61032e-05
Q5SNW7	-8.35436	3.16058e-07	2.61032e-05
P30085	-8.36188	3.75748e-07	2.76574e-05
P30085-3	-8.36188	3.75748e-07	2.76574e-05
K7EPV0	-8.37395	3.85847e-07	2.76574e-05
Q9BYZ2	-8.37752	4.02962e-07	2.76574e-05
I3L288	-8.38926	2.21616e-05	0.00029796
I3NI21	-8.38926	2.21616e-05	0.00029796
I3NI23	-8.38926	2.21616e-05	0.00029796
Q96B96	-8.38926	2.21616e-05	0.00029796
Q96B96-2	-8.38926	2.21616e-05	0.00029796
J3QL48	-8.39352	3.51268e-06	8.17587e-05
Q08J23	-8.4045	3.1488e-07	2.61032e-05
Q08J23-2	-8.4045	3.1488e-07	2.61032e-05
Q08J23-3	-8.4045	3.1488e-07	2.61032e-05
A0A0U1RRL8	-8.42844	4.66616e-06	9.45703e-05
Q8TB22	-8.42844	4.66616e-06	9.45703e-05
Q8TB22-2	-8.42844	4.66616e-06	9.45703e-05
Q8TB22-3	-8.42844	4.66616e-06	9.45703e-05
Q8TB22-4	-8.42844	4.66616e-06	9.45703e-05
G3V4R7	-8.46147	6.27238e-07	3.21182e-05
Q15643	-8.46147	6.27238e-07	3.21182e-05
Q15643-2	-8.46147	6.27238e-07	3.21182e-05
P53701	-8.47983	4.84949e-06	9.72175e-05
A0A096LPE1	-8.48824	3.56493e-06	8.27601e-05
Q6NUQ1	-8.49926	1.26244e-06	4.6534e-05
C9JPW3	-8.50856	1.63768e-06	5.34617e-05
E7EU13	-8.54263	1.31051e-06	4.71264e-05
Q96P48	-8.54263	1.31051e-06	4.71264e-05
Q96P48-1	-8.54263	1.31051e-06	4.71264e-05
Q96P48-2	-8.54263	1.31051e-06	4.71264e-05
Q96P48-3	-8.54263	1.31051e-06	4.71264e-05
Q96P48-4	-8.54263	1.31051e-06	4.71264e-05
E7ESM3	-8.57082	8.36424e-06	0.000142501
H0YC89	-8.60173	8.37229e-07	3.73254e-05
H0YCC4	-8.60173	8.37229e-07	3.73254e-05
Q9BWS9-2	-8.60173	8.37229e-07	3.73254e-05
Q9NPB8	-8.60564	2.59095e-05	0.000339437
S4R359	-8.64303	5.99618e-07	3.16069e-05
B7Z2U2	-8.65012	1.66359e-05	0.000235854
F5H3S6	-8.65012	1.66359e-05	0.000235854
Q6ZVM7	-8.65012	1.66359e-05	0.000235854
Q6ZVM7-2	-8.65012	1.66359e-05	0.000235854
Q6ZVM7-3	-8.65012	1.66359e-05	0.000235854
Q6ZVM7-4	-8.65012	1.66359e-05	0.000235854
Q6ZVM7-5	-8.65012	1.66359e-05	0.000235854
Q9NX76	-8.65836	2.57643e-07	2.4771e-05
K7ELU6	-8.66183	2.18087e-06	6.21393e-05
Q96P48-7	-8.68436	1.27979e-06	4.68655e-05
P06727	-8.68689	5.03155e-07	2.89946e-05
E9PMB6	-8.69987	2.89707e-07	2.55187e-05
A0A1W2PP53	-8.70893	2.96981e-07	2.55889e-05
A0A1W2PR73	-8.70893	2.96981e-07	2.55889e-05
Q969N2-2	-8.70893	2.96981e-07	2.55889e-05
Q8N8A2-3	-8.72247	4.39412e-06	9.27763e-05
Q15814	-8.77927	6.72767e-05	0.000800088
Q9BYV2	-8.78785	1.96933e-05	0.000269816
Q9BYV2-2	-8.78785	1.96933e-05	0.000269816
F8WBW3	-8.81308	5.98327e-07	3.16069e-05
Q8N8A2-5	-8.81308	5.98327e-07	3.16069e-05
Q9GZY8	-8.82496	4.6236e-07	2.78771e-05
Q9GZY8-2	-8.82496	4.6236e-07	2.78771e-05
Q9GZY8-5	-8.82496	4.6236e-07	2.78771e-05
M0R124	-8.87978	5.56467e-07	3.07786e-05
A0A087WZ51	-8.90621	5.89698e-07	3.16069e-05
A0A590UJY6	-8.91881	2.91895e-07	2.55187e-05
A0A590UK85	-8.91881	2.91895e-07	2.55187e-05
P20930	-8.92829	0.00013351	0.00150017
B8ZZI0	-8.94876	5.82864e-07	3.15592e-05
E9PFP1	-9.01767	5.89353e-06	0.000111066
O00459	-9.01767	5.89353e-06	0.000111066
S4R3E5	-9.03583	4.49428e-07	2.76574e-05
E5RJU4	-9.17862	1.69888e-06	5.49592e-05
Q9UDW1	-9.20816	7.35759e-05	0.000868661
H0YAA0	-9.22957	8.68215e-07	3.73629e-05
P36406	-9.23146	3.43484e-06	8.03646e-05
P36406-2	-9.23146	3.43484e-06	8.03646e-05
P36406-3	-9.23146	3.43484e-06	8.03646e-05
E9PKQ1	-9.29344	8.87128e-07	3.74097e-05
E9PP63	-9.29344	8.87128e-07	3.74097e-05
F5GXW1	-9.31867	9.5326e-07	3.96388e-05
K7EJ34	-9.33655	2.98379e-06	7.39633e-05
K7ELM8	-9.33655	2.98379e-06	7.39633e-05
K7EMF4	-9.33655	2.98379e-06	7.39633e-05
K7ENF4	-9.33655	2.98379e-06	7.39633e-05
K7ENZ6	-9.33655	2.98379e-06	7.39633e-05
H7BZK5	-9.34335	2.38717e-07	2.40353e-05
H7BY83	-9.37072	3.89882e-07	2.76574e-05
Q5JSH3	-9.37072	3.89882e-07	2.76574e-05
Q5JSH3-2	-9.37072	3.89882e-07	2.76574e-05
Q5JSH3-4	-9.37072	3.89882e-07	2.76574e-05
Q8NF37	-9.38937	5.07488e-06	9.90762e-05
A0A087X226	-9.39688	4.05207e-06	9.01312e-05
Q16222	-9.39688	4.05207e-06	9.01312e-05
Q16222-2	-9.39688	4.05207e-06	9.01312e-05
Q16222-3	-9.39688	4.05207e-06	9.01312e-05
H3BR88	-9.43843	2.33117e-05	0.000310165
J3KRS1	-9.54679	4.25823e-05	0.000521641
A0A087X1R9	-9.55425	4.99162e-06	9.80038e-05
H7C1L6	-9.55425	4.99162e-06	9.80038e-05
H3BR29	-9.55589	2.58463e-07	2.4771e-05
H3BSM7	-9.55589	2.58463e-07	2.4771e-05
Q96GQ5	-9.55589	2.58463e-07	2.4771e-05
H0Y320	-9.59161	1.92391e-06	5.84935e-05
Q13596	-9.60916	4.00378e-07	2.76574e-05
A0A494C1S4	-9.61023	8.12753e-07	3.65067e-05
C9IYI6	-9.66978	0.00011942	0.00135373
C9JBA9	-9.66978	0.00011942	0.00135373
C9JZ11	-9.71952	3.6687e-06	8.47372e-05
Q13596-2	-9.7997	3.77626e-07	2.76574e-05
P11049	-9.87842	2.5786e-06	6.90787e-05
P11049-2	-9.87842	2.5786e-06	6.90787e-05
K7ERI7	-9.88556	1.70647e-07	2.0173e-05
P35268	-9.88556	1.70647e-07	2.0173e-05
A8MY26	-9.89013	2.4203e-06	6.58974e-05
O14972-2	-9.89013	2.4203e-06	6.58974e-05
A0A024R7W5	-9.99081	4.23695e-07	2.76574e-05
A0A087WY31	-9.99081	4.23695e-07	2.76574e-05
A0A087X0Q1	-9.99081	4.23695e-07	2.76574e-05
Q7Z739	-9.99081	4.23695e-07	2.76574e-05
A0A5F9ZHM8	-9.99826	5.9259e-07	3.16069e-05
P04424	-9.99826	5.9259e-07	3.16069e-05
P04424-2	-9.99826	5.9259e-07	3.16069e-05
P04424-3	-9.99826	5.9259e-07	3.16069e-05
K7ELC4	-10.0185	1.64065e-07	2.0173e-05
K7EMH1	-10.0185	1.64065e-07	2.0173e-05
Q6P4A7	-10.2625	6.18143e-07	3.19792e-05
Q6P4A7-3	-10.2625	6.18143e-07	3.19792e-05
K7ERZ3	-10.2731	3.07159e-07	2.61032e-05
H0YFZ4	-10.3024	2.55973e-05	0.000335593
K7EKS7	-10.3645	1.45574e-07	2.0173e-05
K7EP65	-10.3645	1.45574e-07	2.0173e-05
Q9NZL4	-10.3901	2.34887e-06	6.48636e-05
Q9NZL4-2	-10.3901	2.34887e-06	6.48636e-05
Q9NZL4-3	-10.3901	2.34887e-06	6.48636e-05
Q5T0D2	-10.4112	1.87708e-07	2.02562e-05
A0A087WXD1	-10.4195	3.97533e-07	2.76574e-05
Q96T83	-10.4195	3.97533e-07	2.76574e-05
K7EL96	-10.4513	2.24997e-07	2.27819e-05
G3V4D9	-10.5213	1.55317e-06	5.12632e-05
O43719	-10.5587	4.68196e-07	2.78771e-05
Q5H918	-10.5587	4.68196e-07	2.78771e-05
Q5H919	-10.5587	4.68196e-07	2.78771e-05
A0A2R8Y802	-10.6133	3.61246e-06	8.36466e-05
Q15052	-10.6182	5.32045e-07	2.97978e-05
Q15052-2	-10.6182	5.32045e-07	2.97978e-05
A0A0A0MRM8	-10.7564	1.85075e-07	2.0173e-05
A0A0D9SGC1	-10.7564	1.85075e-07	2.0173e-05
A0A1Y0BRN3	-10.7564	1.85075e-07	2.0173e-05
A0A590UJ40	-10.7564	1.85075e-07	2.0173e-05
A0A590UJ75	-10.7564	1.85075e-07	2.0173e-05
A0A590UKB0	-10.7564	1.85075e-07	2.0173e-05
E7EW20	-10.7564	1.85075e-07	2.0173e-05
Q9UM54	-10.7564	1.85075e-07	2.0173e-05
Q9UM54-1	-10.7564	1.85075e-07	2.0173e-05
Q9UM54-2	-10.7564	1.85075e-07	2.0173e-05
Q9UM54-4	-10.7564	1.85075e-07	2.0173e-05
Q9UM54-5	-10.7564	1.85075e-07	2.0173e-05
Q9UM54-6	-10.7564	1.85075e-07	2.0173e-05
H0Y565	-10.7802	1.30387e-07	2.0173e-05
Q9H2V7-4	-10.8001	4.73612e-07	2.79957e-05
A0A5F9ZHC6	-10.8249	6.06187e-07	3.16869e-05
P63167	-10.8694	2.1346e-07	2.21135e-05
Q01518	-10.8864	9.52831e-05	0.00108768
Q5T0R1	-10.8864	9.52831e-05	0.00108768
Q5T0R2	-10.8864	9.52831e-05	0.00108768
Q5T0R3	-10.8864	9.52831e-05	0.00108768
Q5T0R4	-10.8864	9.52831e-05	0.00108768
Q5T0R5	-10.8864	9.52831e-05	0.00108768
Q5T0R6	-10.8864	9.52831e-05	0.00108768
Q5T0R7	-10.8864	9.52831e-05	0.00108768
A0A3B3ITP4	-10.9035	3.67848e-07	2.76574e-05
Q495G5	-10.9035	3.67848e-07	2.76574e-05
Q8IVH4	-10.9035	3.67848e-07	2.76574e-05
Q9H330	-10.911	1.69333e-07	2.0173e-05
Q9H330-4	-10.911	1.69333e-07	2.0173e-05
C9JGB6	-10.9512	5.61035e-07	3.07786e-05
F8WBX5	-10.9512	5.61035e-07	3.07786e-05
A0A087WZQ7	-10.992	1.56457e-07	2.0173e-05
Q9H115	-10.992	1.56457e-07	2.0173e-05
Q9H115-2	-10.992	1.56457e-07	2.0173e-05
Q9H115-3	-10.992	1.56457e-07	2.0173e-05
C9JKM9	-11.0643	4.75859e-07	2.79957e-05
B1APQ0	-11.1079	5.14997e-07	2.91019e-05
Q13596-3	-11.3631	2.79621e-07	2.55187e-05
Q9BV20	-11.3861	2.00364e-07	2.11637e-05
Q9BV20-2	-11.3861	2.00364e-07	2.11637e-05
A6NIC1	-11.3904	7.12967e-07	3.41744e-05
A0A2R8Y5A0	-11.4288	1.81707e-07	2.0173e-05
A0A2R8YD58	-11.4288	1.81707e-07	2.0173e-05
A0A2R8YF43	-11.4288	1.81707e-07	2.0173e-05
E7EU96	-11.4288	1.81707e-07	2.0173e-05
P68400	-11.4288	1.81707e-07	2.0173e-05
K7EQ60	-11.5383	9.86156e-06	0.00016038
A0A494C0A6	-11.7408	1.32372e-07	2.0173e-05
H0YMR4	-11.7911	7.31311e-07	3.41953e-05
H0YN07	-11.7911	7.31311e-07	3.41953e-05
Q8TEX9	-11.7911	7.31311e-07	3.41953e-05
Q8TEX9-2	-11.7911	7.31311e-07	3.41953e-05
Q16678	-11.8292	8.44728e-07	3.73629e-05
Q8NEV1	-11.8304	1.60257e-07	2.0173e-05
C9JES6	-11.891	9.49329e-06	0.000156377
Q08554	-11.9092	2.08475e-06	6.08516e-05
Q08554-2	-11.9092	2.08475e-06	6.08516e-05
H0YKA2	-11.9525	5.95847e-07	3.16069e-05
Q99797	-11.9593	3.11632e-06	7.52705e-05
P10398-2	-11.9678	9.92311e-08	1.97602e-05
H0YK42	-12.2241	1.88751e-07	2.02562e-05
H0Y873	-12.2978	4.23164e-06	9.14831e-05
Q96P47-5	-12.2978	4.23164e-06	9.14831e-05
Q9Y608	-12.3336	1.77718e-06	5.53925e-05
Q9Y608-2	-12.3336	1.77718e-06	5.53925e-05
Q9Y608-3	-12.3336	1.77718e-06	5.53925e-05
Q9Y608-4	-12.3336	1.77718e-06	5.53925e-05
Q9Y608-5	-12.3336	1.77718e-06	5.53925e-05
Q8TAF3	-12.3842	1.99988e-06	5.89505e-05
Q8TAF3-2	-12.3842	1.99988e-06	5.89505e-05
Q8TAF3-3	-12.3842	1.99988e-06	5.89505e-05
Q8TAF3-4	-12.3842	1.99988e-06	5.89505e-05
Q8TAF3-5	-12.3842	1.99988e-06	5.89505e-05
E9PK19	-12.4296	1.84931e-05	0.000257725
E9PMA1	-12.4296	1.84931e-05	0.000257725
E9PN88	-12.4296	1.84931e-05	0.000257725
H0YCR6	-12.4296	1.84931e-05	0.000257725
C9J015	-12.6369	6.8002e-06	0.000124116
A0A0A0MSJ2	-12.6418	3.80484e-07	2.76574e-05
Q96P48-5	-12.6418	3.80484e-07	2.76574e-05
A0A2R8YFR1	-12.6724	1.24854e-07	2.0173e-05
F2Z3J2	-12.673	1.36066e-07	2.0173e-05
E9PNE7	-12.7207	2.90236e-07	2.55187e-05
E9PNN7	-12.7207	2.90236e-07	2.55187e-05
E9PRH4	-12.7207	2.90236e-07	2.55187e-05
E9PSA8	-12.7207	2.90236e-07	2.55187e-05
G3V1B2	-12.7207	2.90236e-07	2.55187e-05
K4DIA9	-12.7207	2.90236e-07	2.55187e-05
K4DIB5	-12.7207	2.90236e-07	2.55187e-05
Q96H72	-12.7207	2.90236e-07	2.55187e-05
Q96H72-2	-12.7207	2.90236e-07	2.55187e-05
K7EJT5	-12.83	8.46325e-08	1.7949e-05
J3KSP2	-12.8411	1.01064e-07	1.99041e-05
B4DT28	-12.8748	1.82214e-07	2.0173e-05
O43390	-12.8748	1.82214e-07	2.0173e-05
O43390-2	-12.8748	1.82214e-07	2.0173e-05
O43390-3	-12.8748	1.82214e-07	2.0173e-05
O43390-4	-12.8748	1.82214e-07	2.0173e-05
P10398	-13.0873	1.89938e-05	0.000263266
Q96II5	-13.0873	1.89938e-05	0.000263266
Q9NVQ4	-13.352	3.73609e-06	8.56244e-05
Q9NVQ4-2	-13.352	3.73609e-06	8.56244e-05
Q9NVQ4-3	-13.352	3.73609e-06	8.56244e-05
Q9NQL2	-13.4466	2.08309e-07	2.17053e-05
Q9NQL2-2	-13.4466	2.08309e-07	2.17053e-05
Q5T2E7	-13.6102	2.00749e-07	2.11637e-05
Q9BYJ9	-13.7068	3.0149e-07	2.58531e-05
Q96II8	-13.7879	2.9827e-06	7.39633e-05
Q96II8-2	-13.7879	2.9827e-06	7.39633e-05
Q96II8-3	-13.7879	2.9827e-06	7.39633e-05
Q96II8-4	-13.7879	2.9827e-06	7.39633e-05
A0A087WTL9	-14.0645	7.91132e-06	0.000137124
F8VY40	-14.0645	7.91132e-06	0.000137124
F8W1I4	-14.0645	7.91132e-06	0.000137124
Q71RC2	-14.0645	7.91132e-06	0.000137124
Q71RC2-3	-14.0645	7.91132e-06	0.000137124
Q71RC2-4	-14.0645	7.91132e-06	0.000137124
Q71RC2-5	-14.0645	7.91132e-06	0.000137124
Q71RC2-6	-14.0645	7.91132e-06	0.000137124
Q71RC2-7	-14.0645	7.91132e-06	0.000137124
Q8TBL5	-14.0645	7.91132e-06	0.000137124
Q96J85	-14.0645	7.91132e-06	0.000137124
K7EL17	-14.1372	4.342e-07	2.76574e-05
Q68DZ5	-14.1372	4.342e-07	2.76574e-05
Q9NSY1	-14.4178	6.98523e-07	3.40189e-05
Q9NSY1-2	-14.4178	6.98523e-07	3.40189e-05
Q9NSY1-3	-14.4178	6.98523e-07	3.40189e-05
Q96QW7	-14.5934	7.30226e-08	1.76853e-05
Q8IWT6	-14.685	1.52709e-06	5.06825e-05
B4E0E3	-14.9635	3.3162e-07	2.67716e-05
G3V1M5	-14.9635	3.3162e-07	2.67716e-05
Q9H6X4	-14.9635	3.3162e-07	2.67716e-05
Q9H6X4-2	-14.9635	3.3162e-07	2.67716e-05
Q9H6X4-3	-14.9635	3.3162e-07	2.67716e-05
C9JXZ5	-15.1146	1.5516e-07	2.0173e-05
B8ZZY2	-15.1495	7.21172e-08	1.76853e-05
C9J2I0	-15.1495	7.21172e-08	1.76853e-05
P52594	-15.1495	7.21172e-08	1.76853e-05
P52594-2	-15.1495	7.21172e-08	1.76853e-05
P52594-3	-15.1495	7.21172e-08	1.76853e-05
P52594-4	-15.1495	7.21172e-08	1.76853e-05
H0Y2V6	-15.1896	2.63822e-06	7.00477e-05
H0YB92	-15.1896	2.63822e-06	7.00477e-05
Q5SW79	-15.1896	2.63822e-06	7.00477e-05
Q5SW79-2	-15.1896	2.63822e-06	7.00477e-05
Q5SW79-3	-15.1896	2.63822e-06	7.00477e-05
A0A2R8Y7C0	-15.2125	1.30751e-07	2.0173e-05
P69905	-15.2125	1.30751e-07	2.0173e-05
H7C1G6	-15.5842	6.08208e-07	3.16869e-05
A0A2R8YDP2	-15.589	1.04525e-07	2.0143e-05
A0A2R8YFU2	-15.589	1.04525e-07	2.0143e-05
A0A3B3IRZ4	-15.9342	1.11707e-06	4.40841e-05
F6V107	-15.9342	1.11707e-06	4.40841e-05
H7C3Z6	-15.9342	1.11707e-06	4.40841e-05
Q9NRD5-2	-15.9342	1.11707e-06	4.40841e-05
K7EQ37	-16.0329	8.61298e-08	1.7949e-05
Q70J99-2	-16.0329	8.61298e-08	1.7949e-05
H7C3K7	-16.1467	1.14965e-06	4.43797e-05
A0A0A0MRX3	-16.363	8.6592e-07	3.73629e-05
K7EQ08	-16.4045	1.85613e-06	5.70593e-05
M0QZ24	-16.4758	1.21701e-07	2.0173e-05
A0A1B0GXL9	-16.4908	4.52161e-07	2.76574e-05
B0QYS6	-16.4908	4.52161e-07	2.76574e-05
B0QYS7	-16.4908	4.52161e-07	2.76574e-05
B1AKB4	-16.4908	4.52161e-07	2.76574e-05
B1AKB5	-16.4908	4.52161e-07	2.76574e-05
B7Z757	-16.4908	4.52161e-07	2.76574e-05
C9JBI8	-16.4908	4.52161e-07	2.76574e-05
O14948	-16.4908	4.52161e-07	2.76574e-05
O14948-2	-16.4908	4.52161e-07	2.76574e-05
O14948-3	-16.4908	4.52161e-07	2.76574e-05
O14948-4	-16.4908	4.52161e-07	2.76574e-05
O75030	-16.4908	4.52161e-07	2.76574e-05
O75030-10	-16.4908	4.52161e-07	2.76574e-05
O75030-11	-16.4908	4.52161e-07	2.76574e-05
O75030-12	-16.4908	4.52161e-07	2.76574e-05
O75030-2	-16.4908	4.52161e-07	2.76574e-05
O75030-3	-16.4908	4.52161e-07	2.76574e-05
O75030-4	-16.4908	4.52161e-07	2.76574e-05
O75030-5	-16.4908	4.52161e-07	2.76574e-05
O75030-6	-16.4908	4.52161e-07	2.76574e-05
O75030-7	-16.4908	4.52161e-07	2.76574e-05
O75030-8	-16.4908	4.52161e-07	2.76574e-05
O75030-9	-16.4908	4.52161e-07	2.76574e-05
P19484	-16.4908	4.52161e-07	2.76574e-05
P19484-2	-16.4908	4.52161e-07	2.76574e-05
P19532	-16.4908	4.52161e-07	2.76574e-05
C9J673	-16.8754	9.12848e-08	1.88047e-05
C9JCM7	-17.0092	1.17055e-06	4.47017e-05
H0Y5G7	-17.0092	1.17055e-06	4.47017e-05
K7EIG7	-17.224	9.86616e-08	1.97602e-05
O94832	-17.224	9.86616e-08	1.97602e-05
H0YLE5	-17.3072	1.59292e-07	2.0173e-05
Q8NCE2	-17.7883	7.83359e-08	1.7949e-05
Q8NCE2-2	-17.7883	7.83359e-08	1.7949e-05
Q8NCE2-3	-17.7883	7.83359e-08	1.7949e-05
F8VRV5	-17.8129	1.10528e-07	2.0173e-05
F8VXL2	-17.8129	1.10528e-07	2.0173e-05
Q92851-2	-17.8807	3.8256e-08	1.45206e-05
Q92851-4	-17.8807	3.8256e-08	1.45206e-05
Q92851-6	-17.8807	3.8256e-08	1.45206e-05
C9J4I3	-17.9465	3.6785e-07	2.76574e-05
P51692	-17.9465	3.6785e-07	2.76574e-05
A0A0G2JQ62	-18.1296	9.04173e-05	0.00103743
A0A0G2JRI7	-18.1296	9.04173e-05	0.00103743
A0A494C159	-18.1614	2.61984e-07	2.49749e-05
P43490	-18.1641	3.34149e-07	2.68548e-05
Q9NTJ4	-18.9866	2.5152e-07	2.46325e-05
Q9NTJ4-2	-18.9866	2.5152e-07	2.46325e-05
Q9NTJ4-3	-18.9866	2.5152e-07	2.46325e-05
Q9NTJ4-4	-18.9866	2.5152e-07	2.46325e-05
O43252	-19.1816	4.53299e-08	1.45206e-05
C9IYD3	-19.2053	4.61821e-08	1.45206e-05
C9JPY2	-19.2053	4.61821e-08	1.45206e-05
C9JQC9	-19.2053	4.61821e-08	1.45206e-05
C9JVE2	-19.4916	8.00273e-08	1.7949e-05
Q96GG9	-19.4916	8.00273e-08	1.7949e-05
Q8TDZ2	-20.3005	1.2006e-07	2.0173e-05
Q8TDZ2-4	-20.3005	1.2006e-07	2.0173e-05
K7EN81	-20.3537	3.00928e-08	1.45206e-05
Q9UKW4	-20.4098	3.60595e-07	2.76574e-05
Q9UKW4-2	-20.4098	3.60595e-07	2.76574e-05
Q9UKW4-3	-20.4098	3.60595e-07	2.76574e-05
Q9UKW4-4	-20.4098	3.60595e-07	2.76574e-05
J3QRN6	-20.4772	6.69132e-08	1.76853e-05
Q9P035	-20.5465	1.50027e-07	2.0173e-05
Q8NGD4	-20.9189	3.3155e-05	0.000422921
F8WBW1	-21.0357	3.01782e-06	7.44979e-05
F8WC41	-21.0357	3.01782e-06	7.44979e-05
A0A3B3IS23	-21.1525	2.70945e-07	2.54806e-05
A0A3B3ITX2	-21.1525	2.70945e-07	2.54806e-05
A0A2R8Y4D6	-21.3883	2.75167e-08	1.45045e-05
A0A2R8Y4H0	-21.3883	2.75167e-08	1.45045e-05
A0A2R8YEW1	-21.3883	2.75167e-08	1.45045e-05
V9GYA2	-21.3883	2.75167e-08	1.45045e-05
A0A0B4J287	-21.6096	5.00581e-08	1.52058e-05
H3BPG2	-21.6096	5.00581e-08	1.52058e-05
J3KTH7	-21.8347	2.06233e-05	0.000281716
H7C4W6	-22.2181	2.55e-08	1.45045e-05
Q9Y2G3	-22.2181	2.55e-08	1.45045e-05
Q86V21	-22.4456	6.15643e-08	1.75136e-05
Q86V21-3	-22.4456	6.15643e-08	1.75136e-05
A0A1W2PNU5	-22.5009	1.49883e-07	2.0173e-05
A0A3B3IRR1	-22.5009	1.49883e-07	2.0173e-05
A0A3B3IU34	-22.5009	1.49883e-07	2.0173e-05
A0A3B3IU56	-22.5009	1.49883e-07	2.0173e-05
A0A3F2YNY7	-22.5009	1.49883e-07	2.0173e-05
F5GY90	-22.5009	1.49883e-07	2.0173e-05
F5H0P4	-22.5009	1.49883e-07	2.0173e-05
F5H226	-22.5009	1.49883e-07	2.0173e-05
F5H345	-22.5009	1.49883e-07	2.0173e-05
P08397	-22.5009	1.49883e-07	2.0173e-05
P08397-2	-22.5009	1.49883e-07	2.0173e-05
P08397-3	-22.5009	1.49883e-07	2.0173e-05
P08397-4	-22.5009	1.49883e-07	2.0173e-05
C9IZS4	-22.9985	8.24181e-08	1.7949e-05
C9JQ02	-22.9985	8.24181e-08	1.7949e-05
C9JV99	-22.9985	8.24181e-08	1.7949e-05
A0A590UJB9	-23.6248	4.58256e-08	1.45206e-05
A0A590UK79	-23.6248	4.58256e-08	1.45206e-05
H3BPZ1	-23.8562	1.07146e-07	2.0173e-05
H3BS72	-23.8562	1.07146e-07	2.0173e-05
A0A0C4DG34	-24.8099	1.99281e-08	1.45045e-05
O95081	-24.8099	1.99281e-08	1.45045e-05
O95081-2	-24.8099	1.99281e-08	1.45045e-05
Q96GQ5-2	-24.9671	5.93929e-08	1.75136e-05
G3V4E7	-25.104	6.50976e-08	1.76853e-05
H3BPL6	-25.2265	3.6832e-06	8.47372e-05
P0DMM9-2	-25.2265	3.6832e-06	8.47372e-05
P0DMM9-3	-25.2265	3.6832e-06	8.47372e-05
P0DMN0	-25.2265	3.6832e-06	8.47372e-05
Q8TDZ2-2	-25.8666	6.95489e-08	1.76853e-05
B3KNW1	-26.0162	2.45406e-08	1.45045e-05
H7C440	-26.3147	2.49079e-08	1.45045e-05
Q8IYB7	-26.3147	2.49079e-08	1.45045e-05
H7BZC5	-26.5751	8.40306e-08	1.7949e-05
Q9NS86	-27.2939	6.36223e-08	1.76853e-05
G3V4Q2	-27.7994	1.86604e-06	5.7101e-05
G3V5X8	-27.7994	1.86604e-06	5.7101e-05
A0A0C4DFS8	-28.6217	1.85724e-07	2.0173e-05
Q13568	-28.7385	2.51283e-08	1.45045e-05
Q13568-2	-28.7385	2.51283e-08	1.45045e-05
Q13568-3	-28.7385	2.51283e-08	1.45045e-05
Q13568-4	-28.7385	2.51283e-08	1.45045e-05
Q13568-5	-28.7385	2.51283e-08	1.45045e-05
G3V3Z4	-29.0722	2.72976e-07	2.54806e-05
G3V4P5	-29.0722	2.72976e-07	2.54806e-05
A0A2R8YDY7	-29.5455	1.75836e-08	1.45045e-05
E9PKK0	-29.6379	1.03866e-06	4.23065e-05
A0A0A0MRE1	-29.8066	4.1449e-08	1.45206e-05
A0A0A0MSB8	-29.8066	4.1449e-08	1.45206e-05
B4DJ07	-29.8066	4.1449e-08	1.45206e-05
Q9UPT5	-29.8066	4.1449e-08	1.45206e-05
Q9UPT5-1	-29.8066	4.1449e-08	1.45206e-05
Q9UPT5-2	-29.8066	4.1449e-08	1.45206e-05
Q9UPT5-5	-29.8066	4.1449e-08	1.45206e-05
Q9UPT5-6	-29.8066	4.1449e-08	1.45206e-05
A0A0C4DH86	-30.1091	6.08623e-08	1.75136e-05
J3KRN5	-31.1187	3.94439e-06	8.892e-05
U3KQP4	-31.6111	2.5128e-07	2.46325e-05
B4DJ23	-31.799	1.29614e-08	1.45045e-05
A0A3B3IRL2	-32.282	1.76837e-07	2.0173e-05
O75629	-32.282	1.76837e-07	2.0173e-05
K4DI97	-32.364	1.81387e-07	2.0173e-05
H7C3V5	-37.3661	3.51232e-08	1.45206e-05
H0YL22	-37.5621	7.44123e-07	3.41953e-05
H0YNB7	-37.5621	7.44123e-07	3.41953e-05
H0YNN4	-37.5621	7.44123e-07	3.41953e-05
Q9Y375	-37.5621	7.44123e-07	3.41953e-05
C9JME6	-42.1164	2.13601e-08	1.45045e-05
Q9UPT5-4	-42.1164	2.13601e-08	1.45045e-05
H7C059	-46.5032	1.13523e-08	1.45045e-05
A0A2R8Y3W6	-47.3083	9.33444e-09	1.45045e-05
A0A2R8Y797	-47.3083	9.33444e-09	1.45045e-05
A0A2R8Y7T1	-47.3083	9.33444e-09	1.45045e-05
A0A2R8YCK2	-47.3083	9.33444e-09	1.45045e-05
A0A2R8YEL7	-47.3083	9.33444e-09	1.45045e-05
A0A2R8YF47	-47.3083	9.33444e-09	1.45045e-05
V9GY80	-47.3083	9.33444e-09	1.45045e-05
O96011	-49.5138	2.93772e-08	1.45206e-05
Q8IYB7-2	-52.3501	3.09699e-08	1.45206e-05
Q8IYB7-3	-52.3501	3.09699e-08	1.45206e-05
B4DH23	-52.9256	2.18078e-07	2.22068e-05
H3BQH9	-52.9256	2.18078e-07	2.22068e-05
H3BRI3	-52.9256	2.18078e-07	2.22068e-05
O75864	-56.5395	3.55908e-08	1.45206e-05
Q5T196	-65.3822	1.74011e-06	5.5197e-05
Q8NFF5	-65.3822	1.74011e-06	5.5197e-05
Q8NFF5-2	-65.3822	1.74011e-06	5.5197e-05
Q8NFF5-3	-65.3822	1.74011e-06	5.5197e-05
Q8NFF5-4	-65.3822	1.74011e-06	5.5197e-05
Q8NFF5-5	-65.3822	1.74011e-06	5.5197e-05
O96011-2	-68.9729	1.01501e-08	1.45045e-05
O95486	-72.5721	1.43077e-07	2.0173e-05
A6NIZ0	-73.4892	1.86705e-06	5.7101e-05
C9JKC2	-81.5195	1.72615e-08	1.45045e-05
P23409	-110.717	1.72315e-07	2.0173e-05
A0A2R8YCC9	-144.412	1.16002e-07	2.0173e-05
H3BSE5	-168.961	7.38627e-07	3.41953e-05
A0A3B3ISV4	-207.87	4.89735e-09	1.45045e-05
Q8N0U8	-207.87	4.89735e-09	1.45045e-05
Q8N0U8-2	-207.87	4.89735e-09	1.45045e-05
